# Supplementary material for: Multiple gene movements into and out of haploid sex chromosomes
Source: Genome Biol. 2017 Jun 8;18:104. doi: 10.1186/s13059-017-1201-7 (PMC5463336; doi:10.1186/s13059-017-1201-7)
Supplement: Supplementary file 1 — Table S1. Genes present in the male and female sex-specific region of the Ectocarpus sp. sex chromosome. Table S2. Strains used in this study, sequencing statistics and accession numbers. Table S3. Synonymous nucleotide substitutions (dS) for gametologue pairs in the brown algae included in this study. Table S4. Molecular evolutionary features and transcript levels of Ectocarpus sp. and S. japonica sex-linked genes. Table S5. PAML codeml analysis for evidence of positive selection acting on SDR genes using sequences from three Ectocarpus species and S. lomentaria. Table S6. Sex-linked genes and their autosomal homologues in Ectocarpus sp. (Esp), S. lomentaria (Slom), S. japonica (Sjap), M. pyrifera (Mpyr) and U. pinnatifida (Upin). Table S7. Orphan retrogenes in S. japonica for which the parental copy homologue is still present in Ectocarpus sp. genome. Table S8. Nucleotide and protein sequence of the orthologs of the Ectocarpus sp. male and female SDR genes recovered from E. siliculosus, E. fasciculatus, S. lomentaria, S. japonica, M. pyrifera and U. pinnatifida. Table S9. Strains of S. japonica used in this study to correlate phenotypic and genotypic sex. Table S10. Primers used to determine sex linkage in S. japonica. Table S11 Assessment of phenotypic and genotypic sex in S. japonica individuals. (XLSX 318 kb) [file 13059_2017_1201_MOESM1_ESM.xlsx]

## Sheet: Table S1 SDR genes
Table S1. List of genes present in the male and female sex-specific region of the Ectocarpus sp. sex chromosome. Pseudogenes that are part of a gametologue pair are highlighted in italics. Sex-limited pseudogenes that have been excluded from the analysis are represented in grey and are also italicised.
Gene	Functional annotation*	SDR	Gametolog/sex limited
Ec-13_001710	GTPase activating protein	male	gametolog
Ec-sdr_f__000090	GTPase activating protein	female	gametolog
Ec-13_001750	High mobility group domain protein	male	sex-limited
Ec-13_001770	Conserved hypothetical protein	male	sex-limited
Ec-13_001800	Glycosyltransferase domain	male	gametolog
Ec-sdr_f_000060	Glycosyltransferase domain	female	gametolog
Ec-13_001810	MEMO-like domain protein	male	gametolog
Ec-sdr_f_000150	MEMO-like domain protein	female	gametolog
Ec-13_001830	chloroplast clp protease P	male	gametolog
Ec-sdr_f_000080	chloroplast clp protease P	female	gametolog
Ec-13-001840	Conserved hypothetical protein	male	gametolog
Ec-sdr_f_000170	Conserved hypothetical protein	female	gametolog
Ec-13_001890	Conserved hypothetical protein	male	sex-limited
Ec-13_001910	STE20-like serine/threonine kinase	male	gametolog
Ec-sdr_f_000010	STE20-like serine/threonine kinase	female	gametolog
Ec-13_001930	Putative thioesterase/thiol ester dehydrase-isomerase	male	sex-limited
Ec-13_001950	Homoaconitate hydratase	male	gametolog
Ec-sdr_f_000030	Homoaconitate hydratase	female	gametolog
Ec-13_001980	Ubiquitin C-terminal hydrolase	male	sex-limited
Ec-13_001990	Casein kinase	male	gametolog
Ec-sdr_f_000040	Casein kinase	female	gametolog
Ec-13_002030	Conserved hypothetical protein	male	sex-limited
Ec-13_002040	Conserved hypothetical protein	male	gametolog
Ec-sdr_f_000110	Conserved hypothetical protein	female	gametolog
Ec-13_002060	Protein phosphatase 2C	male	gametolog
Ec-sdr_f_000200	Pseudogene	female	gametolog
Ec-13_002070	RING-type Zinc finger domain protein	male	gametolog
Ec-sdr_f_000070	Pseudogene	female	gametolog
Ec-sdr_f_000050	Hypothetical protein	female	sex-limited
Ec-sdr_f_000120	Hypothetical protein	female	sex-limited
Ec-sdr_f_000100	Hypothetical protein	female	sex-limited
Ec-sdr_f_000140	Hypothetical protein	female	sex-limited
Ec-sdr_f_000160	Hypothetical protein	female	sex-limited
Ec-sdr_f_000220	Hypothetical protein	female	sex-limited
Ec-sdr_f_000190	Pseudogene	female	sex-limited
Ec-sdr_f_000020	Pseudogene	female	sex-limited
Ec-sdr_f_000210	Pseudogene	female	sex-limited
Ec-sdr_f_000180	Pseudogene	female	sex-limited
Ec-sdr_f_000130	Pseudogene	female	sex-limited
Ec-13_002080	Pseudogene	male	sex-limited
Ec-13_001850	Pseudogene	male	sex-limited
*Orcae website (http://bioinformatics.psb.ugent.be/orcae/annotation/EctsiV2)

## Sheet: Table S2 strains
Table S2. Strains used in this study and their DNA and RNA sequencing data statistics.
Species	Strain	Sample details for RNA-seq analysis	DNA-seq or RNA-seq	Library reference	Number of raw reads	Accession number	Reference
S. lomentaria (Lyngbye) Link	Slom1	na	DNA	GPO-53	59094294	SRR5026349	this study
S. lomentaria (Lyngbye) Link	Slom2	na	DNA	GPO-54	77803198	SRR5026350	this study
S. lomentaria (Lyngbye) Link	Meiotic progeny of Sl6	Female gametophyte, replicate 1	RNA	GPO-15	75229308	SRR5026364	Lipinska et al., 2015
S. lomentaria (Lyngbye) Link	Meiotic progeny of Sl6	Female gametophyte, replicate 2	RNA	GPO-16	93124633	SRR5026365	Lipinska et al., 2015
S. lomentaria (Lyngbye) Link	Meiotic progeny of Sl6	Male gametophyte, replicate 1	RNA	GPO-17	106655704	SRR5026634	Lipinska et al., 2015
S. lomentaria (Lyngbye) Link	Meiotic progeny of Sl6	Male gametophyte, replicate 2	RNA	GPO-18	69382687	SRR5026635	Lipinska et al., 2015
E. siliculosus (Dillwyn) Lyngbye	Rb1	na	DNA	GPO-44	36003088	SRR5026351	this study
E. siliculosus (Dillwyn) Lyngbye	EA1	na	DNA	GPO-45	33941068	SRR5026352	this study
E. fasciculatus Harvey	191 A9	na	DNA	GPO-28	48684834	SRR5026353	this study
E. fasciculatus Harvey	191 B4	na	DNA	GPO-29	43541106	SRR5026354	this study
M. pyrifera (L.) C.Agardh)	P11 B4 and P11 D6	Male gametophyte, replicate 1	RNA	GPO-38	32288626	SRR5026366	this study
M. pyrifera (L.) C.Agardh)	P11 B4 and P11 D6	Male gametophyte, replicate 2	RNA	GPO-39	37796328	SRR5026588	this study
M. pyrifera (L.) C.Agardh)	P11 B4 and P11 D6	Male gametophyte, replicate 3	RNA	GPO-40	43967360	SRR5026590	this study
M. pyrifera (L.) C.Agardh)	P11 D3 and P11 A2	Female gametophyte, replicate 1	RNA	GPO-41	34843828	SRR5026591	this study
M. pyrifera (L.) C.Agardh)	P11 D3 and P11 A2	Female gametophyte, replicate 2	RNA	GPO-42	39761814	SRR5026593	this study
M. pyrifera (L.) C.Agardh)	P11 D3 and P11 A2	Female gametophyte, replicate 3	RNA	GPO-43	38281794	SRR5026594	this study
M. pyrifera (L.) C.Agardh)	P11 A2	na	DNA	GPO-21	48613806	SRR5026355	this study
M. pyrifera (L.) C.Agardh)	P11 B1	na	DNA	GPO-22	50717548	SRR5026357	this study
M. pyrifera (L.) C.Agardh)	P11 A1	na	DNA	GPO-23	51298128	SRR5026360	this study
M. pyrifera (L.) C.Agardh)	P11 D6	na	DNA	GPO-24	51459286	SRR5026361	this study
M. pyrifera (L.) C.Agardh)	P11 A4	na	DNA	GPO-25	58065022	SRR5026362	this study
M. pyrifera (L.) C.Agardh)	P11 B4	na	DNA	GPO-26	59451984	SRR5026363	this study
Ectocarpus sp.	Ec603	Immature male gametophyte, replicate 1	RNA	GBP-24	80602259	SRR1660829	Lipinska et al., 2015
Ectocarpus sp.	Ec603	Immature male gametophyte, replicate 2	RNA	GBP-25	85541801	SRR1660830	Lipinska et al., 2015
Ectocarpus sp.	Ec603	Mature male gametophyte, replicate 1	RNA	GPO-1	25119067	SRR1166429	Lipinska et al., 2015
Ectocarpus sp.	Ec603	Mature male gametophyte, replicate 2	RNA	GPO-2	26873490	SRR1166430	Lipinska et al., 2015
Ectocarpus sp.	Ec602	Immature female gametophyte, replicate 1	RNA	GBP-22	75827247	SRR1166427	Lipinska et al., 2015
Ectocarpus sp.	Ec602	Immature female gametophyte, replicate 2	RNA	GBP-23	93562945	SRR1166428	Lipinska et al., 2015
Ectocarpus sp.	Ec602	Mature female gametophyte, replicate 1	RNA	GPO-3	21005896	SRR1166441	Lipinska et al., 2015
Ectocarpus sp.	Ec602	Mature female gametophyte, replicate 2	RNA	GPO-4	32150185	SRR1166452	Lipinska et al., 2015
Ectocarpus sp.	Ec32	Base of partheno-sporophyte, replicate 1	RNA	GBP-16	35017809	SRR3108632	Cormier et al., 2016
Ectocarpus sp.	Ec32	Base of partheno-sporophyte, replicate 2	RNA	GBP-17	32818363	SRR3108633	Cormier et al., 2016
Ectocarpus sp.	Ec32	Upright filaments of partheno-sporophyte, replicate 1	RNA	GBP-18	32080985	SRR3108626	Cormier et al., 2016
Ectocarpus sp.	Ec32	Upright filaments of partheno-sporophyte, replicate 2	RNA	GBP-19	34753366	SRR3108627	Cormier et al., 2016
Ectocarpus sp.	Ec17	Heterozygous diploid sporophyte, replicate 1	RNA	GPO-34	50015364	SRR4446494	This study
Ectocarpus sp.	Ec17	Heterozygous diploid sporophyte, replicate 2	RNA	GPO-35	40230402	SRR4446495	This study
S.japonica (Areschoug) C.E.Lane, C.Mayes, Druehl & G.W.Saunders	sporophyte	na	DNA	na	157566200	SRS947874	Ye et al., 2015
S.japonica (Areschoug) C.E.Lane, C.Mayes, Druehl & G.W.Saunders	sporophyte	na	DNA	na	158892558	SRS947873	Ye et al., 2015
S.japonica (Areschoug) C.E.Lane, C.Mayes, Druehl & G.W.Saunders	sporophyte	na	DNA	na	166419490	SRS947868	Ye et al., 2015
S.japonica (Areschoug) C.E.Lane, C.Mayes, Druehl & G.W.Saunders	sporophyte	na	DNA	na	206223678	SRS947867	Ye et al., 2015
S.japonica (Areschoug) C.E.Lane, C.Mayes, Druehl & G.W.Saunders	gametophyte	na	DNA	na	82773558	SRS947885	Ye et al., 2015
S.japonica (Areschoug) C.E.Lane, C.Mayes, Druehl & G.W.Saunders	gametophyte	na	DNA	na	71700190	SRS947883	Ye et al., 2015
S.japonica (Areschoug) C.E.Lane, C.Mayes, Druehl & G.W.Saunders	sporophyte	na	RNA	na	25315304	GSM838019	Deng et al., 2012
S.japonica (Areschoug) C.E.Lane, C.Mayes, Druehl & G.W.Saunders	sporophyte	na	RNA	na	23963660	GSM838020	Deng et al., 2012
S.japonica (Areschoug) C.E.Lane, C.Mayes, Druehl & G.W.Saunders	spores	Spores	RNA	na	61105956	SRR2064654	Ye et al., 2015
S.japonica (Areschoug) C.E.Lane, C.Mayes, Druehl & G.W.Saunders	male gametophyte	Male gametophyte	RNA	na	130107642	SRR2064656	Ye et al., 2015
Undaria pinnatifida	sporophyte	na	DNA	na	19494036	SRR2976377
Undaria pinnatifida	gametophyte	Female gametophyte, vegetative growth	RNA	na	62219130	SRR1265059	Shan et al., 2015
Undaria pinnatifida	gametophyte	Female gametophyte, fertile	RNA	na	98711188	SRR1533002	Shan et al., 2015
Undaria pinnatifida	gametophyte	Male gametophyte, vegetative growth	RNA	na	76742026	SRR1533919	Shan et al., 2015
Undaria pinnatifida	gametophyte	Male gametophyte, fertile	RNA	na	83670206	SRR1533920	Shan et al., 2015

## Sheet: Table S3 dS
Table S3. Synonymous nucleotide substitutions per site (dS) for gametologue pairs in the brown algae included in this study. Pairs with pseudogenes were excluded.
Gametolog pair	E. sp	E. fas	E. sil	S. lom	S. jap	M. pyr	U. pin
Ec-13_001710/Ec-sdr_f_000090	1.3577	2.0973	0.6986			5.7383	56.9175
Ec-13_001800/Ec-sdr_f_000060	1.722	2.0808	1.6063	1.7717
Ec-13_001810/Ec-sdr_f_000150	1.5163		1.0684	3.8646			2.2693
Ec-13_001830/Ec-sdr_f_000080	0.6126
Ec-13_001840/Ec-sdr_f_000170	11.8025	6.0729	19.6381	48.0471	9.4936	16.4348	12.9653
Ec-13_001910/Ec-sdr_f_000010	0.7547	0.5925	0.1442	2.5219	2.3923	6.5655
Ec-13_001950/Ec-sdr_f_000030	1.9021		2.1086	3.1431	2.4963	70.6054
Ec-13_001990/Ec-sdr_f_000040	2.465	2.4102	47.0298	4.1017			50.4816
Ec-13_002040/Ec-sdr_f_000110	2.3629	2.3349	1.7134	2.3424
Ec-13_001410m/Ec-13_001410f				1.7569	1.5861	1.5593	0.9695
Ec-13_001980m/Ec-13_001980f				46.61

## Sheet: Table S4 characteristics
Table S4. Molecular evolutionary features and transcript levels of Ectocarpus sp. and S. japonica sex-linked genes. Sex-linked genes are marked in bold. Sex-limited pseudogenes have been excluded from this analysis. Names of pseudogenes that belong to a gametolog pair are in italics. Values significantly above and below the genome average are shown in green and red, respectively. Pairwise compari…
	Ectocarpus sp.		Ectocarpus	Ectocarpus					S. japonica	Saccharina	Saccharina	Saccharina	Saccharina	Saccharina	Saccharina
Gene E. sp	GC	GC3	CAI	max log2TPM	dS	dN	dNdS	Gene S.jap	GC	GC3	CAI	max log2TPM	dS	dN	dNdS
Ec-13_001710	0.513937	0.62963	0.502	5.77011	0.1	0.0001	0.001	SJ15874	0.475174	0.69727	0.57	4.2671	0.3684	0.0684	0.1858
Ec-sdr_f_000090	0.49774	0.601885	0.491	6.45036	0.6796	0.3031	0.446
Ec-13_001800	0.520745	0.549937	0.439	5.78351	0.1461	0.1194	0.8171	SJ18945	0.494566	0.592021	0.444	5.10066	0.3237	0.2674	0.8261
Ec-sdr_f_000060	0.492293	0.571429	0.472	5.62691	0.2038	0.0826	0.4054
Ec-13_001810	0.50304	0.60061	0.517	6.09922				SJ13722	0.110164	0.753289	0.657	4.66339	0.4849	0.0359	0.074
Ec-sdr_f_000150	0.32138	0.636735	0.543	4.74878	0.2116	0.0305	0.1444
Ec-13_001830	0.50476	0.603774	0.465	7.60627
Ec-sdr_f_000080	0.586013	0.573585	0.457	9.38522
Ec-13_001840	0.501795	0.526212	0.436	5.4334	0.1337	0.0244	0.1826
Ec-sdr_f_000170	0.483177	0.562637	0.446	3.27265	0.1202	0.0561	0.4667
Ec-13_001910	0.499781	0.643836	0.544	6.43362	0.057	0.0047	0.0829	SJ00948	0.504187	0.655329	0.518	6.7563	0.2865	0.0362	0.1265
Ec-sdr_f_000010	0.390673	0.684086	0.545	6.76015	0.1697	0.0043	0.0255
Ec-13_001950	0.508263	0.646098	0.555	8.76917	0	0.3011	0.0032	SJ10505	0.509798	0.705314	0.57	7.40636	0.1966	0.012	0.0612
Ec-sdr_f_000030	0.485996	0.650246	0.562	8.72781
Ec-13_001990	0.504497	0.563559	0.476	5.02144	0.1992	0.0185	0.0929	SJ09422	0.624738	0.779874	0.71	0
Ec-sdr_f_000040	0.278429	0.587762	0.5	2.53985
Ec-13_002040	0.5	0.589041	0.523	5.52984	0.1244	0.0115	0.0921
Ec-sdr_f_000110	0.449184	0.633423	0.477	3.46106	0.1082	0.0532	0.4918
Ec-13_002060	0.491616	0.556338	0.485	6.35416
Ec-sdr_f_000200	0.289254	0.677966	0.548	5.33366
Ec-13_002070	0.514959	0.485549	0.447	5.24838				SJ15797	0.540402	0.548387	0.398	5.69017
Ec-sdr_f_000070	0.362588	0.617647	0.469	5.07923
Ec-13_001750	0.516846	0.550308	0.455	5.61322	0.2682	0.0624	0.2328	SJ05808	0.463309	0.568093	0.456	6.05238	0.2336	0.0858	0.3671
Ec-13_001770	0.509059	0.551346	0.449	5.26853	0.1013	0.0598	0.59	SJ05597	0.538616	0.580128	0.469	0	0.2237	0.0725	0.3242
Ec-13_001890	0.491303	0.62585	0.494	7.11346
Ec-13_001930	0.511979	0.760479	0.599	4.32164
Ec-13_001980	0.508404	0.643243	0.544	6.04623	0.116	0.0368	0.3174
Ec-13_002030	0.482014	0.760417	0.631	3.98087
Ec-13_001410	0.540566	0.665924	0.781	4.21765				SJ21771_SJ04462*	0.542961	0.592071	0.494	4.45226	0.30915	0.2052	0.66265
Ec-13_002450	0.513566	0.789773	0.815	4.97487				SJ00352	0.467919	0.73384	0.631	4.06766	0.6253	0.0325	0.0521
Ec-sdr_f_000050	0.499373	0.648936	0.555	3.24812
Ec-sdr_f_000100	0.544726	0.529412	0.468	2.64337	3.0195	0.164	0.0543
Ec-sdr_f_000120	0.478351	0.794326	0.64	2.50723
Ec-sdr_f_000140	0.390407	0.581242	0.49	4.13247
Ec-sdr_f_000160	0.514661	0.483333	0.371	1.93409	1.0557	0.1375	0.1302
Ec-sdr_f_000220	0.502871	0.598425	0.48	3.0997	0.2626	0.0513	0.1955
Genome Average (95% CI)	0.5358364 (0.53583, 0.53584)	0.722289 (0.722278, 0.722299)	0.6031 (0.6029, 0.6033)	5.265098 (5.2648, 5.2654)	0.3932222 (0.3190415, 0.4674029)	0.08010526 (0.07078558, 0.08942495)	0.2511579 (0.227684, 0.2746318)	Genome Average (95% CI)	0.5293276 (0.52932, 0.52933)	0.7153012 (0.715293, 0.71531)	0.6060 (0.6059, 0.6062)	4.231802 (4.2315, 4.2321)	0.3631381 (0.3517517, 0.3745245)	0.0441619 (0.04134239, 0.04698141)	0.1399952 (0.1285057, 0.1514847)
*The two gene models in Saccharina were fused based on RNA-Seq evidence and homology to Ec-13_001410

## Sheet: Table S5 PAML
Table S5. PAML codeml analysis for evidence of positive selection acting on SDR genes using sequences from tree Ectocarpus species and S. lomentaria. Pseudogenes were excluded from this analysis.
			lnL				LRT
Gene	kappa (ts/tv)	omega (dN/dS)*	M1	M2	M7	M8	M1-M2	M7-M8
Ec-13_001710	1.91104	0.07984	-403.101	-402.85	-403.217	-402.852	0.50247	0.729754
Ec-sdr_f__000090	1.68609	0.1521	-699.176	-699.176	-699.18	-699.18	4.8e-05	-4.4e-05
Ec-13_001800	2.58862	0.45259	-2130.11	-2128.7	-2130.65	-2128.84	2.81886	3.6211
Ec-sdr_f_000060	2.17303	0.32768	-2230.83	-2230.83	-2231.21	-2230.83	0	0.749498
Ec-sdr_f_000150	2.40827	0.14203	-1065.52	-1064.9	-1066.06	-1064.85	1.23022	2.42425
Ec-13-001840	2.29808	0.15741	-1510.64	-1510.64	-1510.07	-1510.07	0	-1.6e-05
Ec-sdr_f_000170	2.58228	0.19877	-1607.88	-1607.88	-1607.19	-1607.19	0	-8e-06
Ec-13_001910	3.18288	0.01854	-631.444	-631.444	-630.614	-630.614	0	-0.000576
Ec-sdr_f_000010	3.44566	0.02437	-579.665	-579.665	-579.275	-579.275	0	-0.000136
Ec-13_001950	1.77201	0.03979	-2569.58	-2569.58	-2542.76	-2542.18	0	1.16179
Ec-sdr_f_000030	2.24433	0.01837	-2218.12	-2217.29	-2220.08	-2217.39	1.67232	5.3813
Ec-13_001990	2.07669	0.02666	-315.867	-315.625	-316.297	-315.626	0.48497	1.34299
Ec-13_002040	3.70846	0.29418	-331.509	-331.509	-331.347	-331.347	0	-1.8e-05
Ec-sdr_f_000110	1.73863	0.32938	-414.765	-414.765	-414.775	-414.769	0	0.011712
Ec-13_001750	2.20492	0.30807	-3099.97	-3099.97	-3101.17	-3099.21	0	3.91542
Ec-13_001770	2.67711	0.43548	-659.513	-659.513	-659.344	-657.637	0	3.41498
Ec-13_001980	1.53665	0.11499	-661.73	-661.73	-661.025	-660.82	0	0.409406
Ec-sdr_f_000100	2.16133	3.76214	-226.857	-224.376	-226.857	-224.376	4.962	4.96201
Ec-sdr_f_000140	2.39581	0.27265	-2174.11	-2174.11	-2173.83	-2173.83	0	2e-06
Ec-sdr_f_000160	2.86415	0.99438	-1079.33	-1079.24	-1079.35	-1079.24	0.167524	0.210202
Ec-sdr_f_000220	2.23691	0.25595	-1402.66	-1402.64	-1403.37	-1402.65	0.047558	1.44441
*dN/dS as calculated by model M0.

## Sheet: Table S6 autos. hom
Table S6: List of sex-linked genes and their autosomal homologues in Ectocarpus sp. (E. sp), S. lomentaria (Slom), S. japonica (Sjap), M. pyrifera (Mpyr) and U. pinnatifida (Upin). Search for homologs was based on blastx on the V2 proteome of E. sp (http://bioinformatics.psb.ugent.be/orcae/overview/EctsiV2). E. sp pseudogenes are highlighted in italic. Sex-limited pseudogenes have been excluded.
E. sp. female SDR gene	% identity between gametologues (% matched region)	E. sp. male SDR gene	% identity (% matched region) between SDR gene and non-SDR homologue	E. sp. non-SDR homologue	Slom non-SDR homologue	Sjap non-SDR homologue	Mpyr non-SDR homologue	Upin non-SDR homologue
		Ec-13_001750	28% (26%)	Ec-11_005660	Yes	Yes	Yes	Yes
		Ec-13_001770	24% (60%)	Ec-18_004380	Yes	Yes	Yes	Yes
		Ec-13_001890	41% (76%)	Ec-27_001150	No	Yes	Yes	Yes
		Ec-13_001930	99% (100%)	Ec-13_001490*	Yes	Yes	Yes	Yes
		Ec-13_001980	28% (68%)	Ec-14_003970	Yes	Yes	Yes	Yes
		Ec-13_002030	98% (49%)	Ec-11_001380	Yes	No	No	No
Ec-sdr_f_000090	62% (70%)	Ec-13_001710	34% (22%)	Ec-16_000800	Yes	Yes	Yes	Yes
Ec-sdr_f_000060	52% (93%)	Ec-13_001800	31% (15%)	Ec-22_000100	Yes	No	No	No
Ec-sdr_f_000150	68% (74%)	Ec-13_001810		no hit
Ec-sdr_f_000080	94% (100%)	Ec-13_001830	83% (72%)	Ec-07_005420	Yes	Yes	Yes	Yes
Ec-sdr_f_000170	30% (83%)	Ec-13_001840		no hit
Ec-sdr_f_000010	91% (90%)	Ec-13_001910	32% (84%)	Ec-20_002080	Yes	Yes	Yes	Yes
Ec-sdr_f_000030	95% (74%)	Ec-13_001950	27% (84%)	Ec-16_001000	Yes	Yes	Yes	Yes
Ec-sdr_f_000110	71% (89%)	Ec-13_002040	59% (79%)	Ec-02_005150	Yes	Yes	Yes	Yes
Ec-sdr_f_000200	49% (87%)	Ec-13_002060	49% (86%)	Ec-11_001300	Yes	Yes	Yes	Yes
Ec-sdr_f_000070	84% (16%)	Ec-13_002070	41% (23%)	Ec-27_006210	Yes	Yes	Yes	Yes
Ec-sdr_f_000040	55% (50%)	Ec-13_001990	53% (70%)	Ec-23_000950	Yes	Yes	Yes	Yes
Ec-sdr_f_000100			42% (42%)	Ec-06_004540	Yes	Yes	Yes	Yes
Ec-sdr_f_000140			20% (47%)	Ec-03_002500	Yes	No	No	No
Ec-sdr_f_000220			26% (69%)	Ec-24_003300	Yes	No	No	No
Ec-sdr_f_000050			87% (94%)	Ec-02_002530	No	No	No	No
Ec-sdr_f_000120			100% (43%)	Ec-13_003010*	No	No	No	No
Ec-sdr_f_000160				no hit
*Gene located in the pseudoautosomal region of the sex chromosome

## Sheet: Table S7 retrogenes
Table S7. List of Saccharina japonica retrogenes where the parental copy has been lost but is still present in the Ectocarpus sp. genome (orphan retrogenes). Mean expression level is based on four different libraries (SRR2064651, SRR2064652, SRR2064654SP, SRR2064656) corresponding to sporophytes conditioned under either dark or blue light, spores and gametophytes, respectively. In bold, retrogene…
Retrogene (Sjap)	Ectocarpus orthologue of parent (E.sp)	Chromosome (E. sp)	% ident	Alignment length	E value	Length (aa) Sjap	Length (aa) E.sp	No introns Sjap	No introns E.sp	Mean expression in Sjap (log2TPM )	SE
SJ05810	Ec-01_008790	chrom 01	54.21	642	0	609	822	0	3	3.56889	0.270248
SJ07688	Ec-08_000580	chrom 08	58.92	482	6e-170	532	516	0	2	1.40854	0.525307
SJ11982	Ec-12_000370	chrom 08	52.45	347	2e-110	354	343	0	2	3.63698	0.52014
SJ12356	Ec-09_000990	chrom 09	71.47	382	0	494	451	0	3	3.72035	0.316945
SJ13722	Ec-sdr_f_000150	chrom 13	71.56	225	9e-122	303	244	0	8	3.44423	0.745624
SJ15100	Ec-27_001390	chrom 27	72.3	148	3e-48	143	208	0	3	0.03	0
SJ15380	Ec-24_000290	chrom 24	60.87	276	2e-93	283	376	0	4	0	0
SJ16346	Ec-13_002100	chrom 13	79.44	676	0	677	641	0	13	5.34851	0.529824
SJ16454	Ec-23_002570	chrom 23	71.74	506	0	533	536	0	3	1.54306	0.805352
SJ16511	Ec-13_000950	chrom 13	68.95	351	5e-153	350	328	0	6	5.12086	0.386537
SJ16790	Ec-13_000850	chrom 13	59.41	441	1e-142	453	466	0	8	4.00441	0.325678
SJ19521	Ec-13_002090	chrom 13	77.07	157	2e-81	162	193	0	5	5.00152	0.191959
SJ20715	Ec-20_004650	chrom 20	76.9	394	0	416	380	0	3	0	0
SJ20744	Ec-13_000640	chrom 13	67.71	223	2e-89	283	306	0	7	6.95643	0.131407
SJ21595	Ec-16_002010	chrom 16	81.71	421	0	543	453	0	2	0	0
SJ22327	Ec-18_003960	chrom 18	76.43	157	2e-83	157	164	0	2	6.94152	0.627386
												*
SJ09422*	Ec-13_001990	chrom 13	71.6	405	0	476	707	0	14	0	0
SJ15797*	Ec-13_002070	chrom 13	71	154	3e-68	309	173	1	4	5.04897	0.307449
*These genes were excluded from the genome-wide analysis of orphan retrogenes because one is a pseudoretrogene (in italics) and the other contains an intron.

## Sheet: Table S8 Gene_sequences
Table S8 . Nucleotide and protein sequence of the orthologs of the Ectocarpus sp. male and female SDR genes recovered from E. siliculosus, E. fasciculatus, S. lomentaria, S. japonica, M. pyrifera and U. pinnatifida
	Ectocarpus siliculosus				Ectocarpus fasciculatus				Scytosiphon lomentaria				Saccharina japonica				Macrocystis pyrifera				Undaria pinnatifida
Closest Blast match in Ectocarpus sp.	Locus ID	Linkagea	Nucleotide seq.	Protein seq.	Locus ID	Linkage	Nucleotide seq.	Protein seq.	Locus ID	Linkage	Nucleotide seq.	Protein seq.	Locus ID	Linkage	Nucleotide seq.	Protein seq.	Locus ID	Linkagea	Nucleotide seq.	Protein seq.	Locus ID	Linkagea	Nucleotide seq.	Protein seq.
Ec-13_001710	Esil-13_001710	M	CTCAGGGTAAGGTGGTCGAAGGAGGACAGGCGAGCACAAAAGTGGCGAACGATCGACAATTTTGACAGTTGGAGGATGGGAAAGAAGGCCACACGATTCCGAAACAAGGGTGTGCCAGACTGCGTTCGGGGCAAAGTTTGGCAGATGCTGATGGGATCCACGGCTATGATGGAAAGGGAGCCGAACAAGTACGCAGACCTGGTGGCGAGTGATCTCCCGCCCATCGAAGAAGACATACCCCGCACGATGTACGACCATGAGCTATTCTGCCGCAAGTCGCGAGTCAATGGGAGAGATATGCTGCGGAGAGTTTTGACGGCATATGGGCGCTATGATCGAGAGGTGCAGTATTGCCAGGGCATCAACTACATAATGTCCTTGTTTCTGCTCTATATGCCG…	LRVRWSKEDRRAQKWRTIDNFDSWRMGKKATRFRNKGVPDCVRGKVWQMLMGSTAMMEREPNKYADLVASDLPPIEEDIPRTMYDHELFCRKSRVNGRDMLRRVLTAYGRYDREVQYCQGINYIMSLFLLYMPEENAFWLLVATMHRPCAPLRELFLPGMLKVQEFQFVMDSLTKKHCRKLSAQILVNDLTPAMYATQWFLTAFTQRFPYELVTRVWDMFLLEDWKVFYRVCLALFK	Efas-13_001710	M	GCCCAAGAATTCCAGTTTGTGATGGACTCACTTACGAAGAAGCACTGCGAGAAGCTCTCAAACCAGATCCTGGCACATAACCTCACTCCTGCCATGTACGCGACCCAGTGGTTCCTGACCGCATTCACCCAGCGTTTCCCGTACGACTTGGTGACCCGCGTGTGGGACATGTTCCTCCTGGAGGACTGGAAGGTGTTCTACAGAGTGTGTCTGGCGTTATTCAAG	AQEFQFVMDSLTKKHCEKLSNQILAHNLTPAMYATQWFLTAFTQRFPYDLVTRVWDMFLLEDWKVFYRVCLALFK	SL-13_001710	A?	ATGCCAGAAGGTGTGCGACGTTCAGGATCAGGGTCTGATGATGGTGCGCTCCCCGCGTCCGATGTGAACTTGGTGCGCCAACCTGCAGCTTTGCGGGTAGACCCAGCTTGCTTGTCGGAAGAGCTTGGGAAAGCTGCTGCAAGAGCAGCCGCCGGGGGAGTGACATCAGAGGGAGAGGAGCCTTCTCCGCAGGCTTCCGTTGTCGCAGGTGCAGGAATCCTATCCCGACGTGCGCTGTCTTCAGAAGAGGCGCAAACCGTACTAGCGCAGGAAGGCAATGCTAGCAAAGTTACGGATTTCCTTGGAGGCTCGGGCATGGAATCACCACGGACAACAGAGACCCGTGGGCGTGATTGTGAGAAACGTCGCGAACATGAGGGCAACAGCCTGGACACTTCG…	MPEGVRRSGSGSDDGALPASDVNLVRQPAALRVDPACLSEELGKAAARAAAGGVTSEGEEPSPQASVVAGAGILSRRALSSEEAQTVLAQEGNASKVTDFLGGSGMESPRTTETRGRDCEKRREHEGNSLDTSVSKATGFVASGAGKSTPQRQDIYPCCTDAGTPDDRNACGGGSDAESSEDERFNLSVKTDRYGFFVTSERRRLEVPTKVPRAIRSRESKRADKWRTMIDNFDDWQEGRKGARFRSRVRKGVPDCVRGKVWQMMTGSTAMMELEPNKYADLVASDLPVDGPIAEDIPRTMYDHELFCPKSRVNGREMLRRVLTAYGRYDREVQYCQGINYICSLFLLYMPEENAFWMLVATMKHPKAPLRELFLPGMMKAQEVQFVMDSLTEKYCTKL…	SJ15874	A	ATGCCCTCACCTGGAGGTTCCGTCCAGCTCAAAGTGGTTGAAGGGAGTACGCTGCTGTCGGCGAACGACGAAAATCGGGA TCCAGACCTGGCCGAAAAAGTGGGGGAGCCAGCCGAAGCTGGAGGGGGGGCACATACTCGGGACGCCGATGCGTCGTTCG ACGAACGGTTCAACTCTGCTGTAAAAACTGACCGCTACGGGTTTTTCCTGACGAGCGACCGACTGGCGTTCGATATCGAG ATCCCATCGGAGGTTGTCAAAGCAAGGCGCTCGAAGGAGGGCAAGCGGGCATACAAGTGGCGAAAAATGATCGATAATTT CGACAGCTGGCGAAAGGGACGGAAGTCTAAAGTCTTCCGGAACAGGGTGCGCAAGGGTGTGCCTGACTGCGTGAG…	MPSPGGSVQLKVVEGSTLLSANDENRDPDLAEKVGEPAEAGGGAHTRDADASFDERFNSAVKTDRYGFFLTSDRLAFDIEIPSEVVKARRSKEGKRAYKWRKMIDNFDSWRKGRKSKVFRNRVRKGVPDCVRGRVWQMMMGSMAMQDKEPNRYSELVASDLAVEGPIEEDIPRTMFDHELFCQNARVNGRDMLRRVLTAYGRYDREVQYCQGINYICSLFLIYMPEENAFWMLVASMNRPTAPLRELFLPGMVKAQEFQFVVDSLAAKYCSKLSAQILANNLTPAMYATQWFLTAFTQRFPYDLVTRVWDMFLLEDWKVFYRVCLALFKSVEEKATNLDLEDLNLLLRNMPLKVDAEQILEISAGIPLKHRHIKKRVDLFYADVAVGGGGGGRNGAART…	MP-13_001710	M	ATGAATCATTCCTCGGAAGCGAACGTGGTTAAGAGTGCCCGTGATCGCCGGCGAGAACTGATCGCACTAGCTAGCAAACGATTGTTCGAGAGTATGGACTATGACGAGGACAACGATGGAAGTGGTGACACAAAGGATAGCAGCACGGACTACTTGGGGGACACTCCGTTTCGCCGTTCTCCGTCTGTGGGATCTGGTGGCAAAAATGTTGGAGCTTTCTACCCCTTGACGCGTGTGACCAAGAATGCAGCAGCTTGTGCGTCTACATCCCTTGCTCGCAAGCAGGCCATATCAACCGATTGCAAAGGAGGAGACACGACGAATGGAGCCGGGGCGACTAGTAGTGAAAGCTTTTCCACAGATTGTGCGCCAGGGGCTTGGCTGCCCTCCCGATCGTCG…	MNHSSEANVVKSARDRRRELIALASKRLFESMDYDEDNDGSGDTKDSSTDYLGDTPFRRSPSVGSGGKNVGAFYPLTRVTKNAAACASTSLARKQAISTDCKGGDTTNGAGATSSESFSTDCAPGAWLPSRSSTTFLGTPEGTLDVDEGGSGSSREQPQPSDSKSINHGSTSFESLSSTEEAVKSYTESIFKASTGLASDAQFTVADMQSRRQDGDWGGTETPCPVLASAGAVPTALAEGDAAVSRSRINPKDDQKQEHARAITMQSEKLQRRYFEKEGRVVHSSPFDARSYSLNANIGQAGGGRREVRVCNGEPNISADTIATRAATSAVKRGQGCFCFDDDQRVCIQHPATSHGIYSVSSAEDDAMNEHTSKLIPEVASLPFDVVSGGDADPKTGEM…	UP-13_001710	M	CGGGTCCAGATAACAGAACAGGTTCACCGACAAGTGGGAAGCAGCATGGTCAAGATCGCCCGTGATCGGCGGCGGGAACTTATTGCACTGGCCAGCAAGCGATTGTTCGAGAGTATCGATTACGACGAGGTGAATGATGGAGGTGGTGAAGGAGTGGACGACAGAGCGAACCCCGTGAGGGAAACACCGTTTCGCGATGCGCCGTCGGTGGTGGTTGGTGGACAAAAAGTTGGGGCTTCGAACACCTTGAGACGTGTGATGAACGATGCAGCAGTGGATGTAGCGACATCCCATGCCGATAGGAAGGCCATAACAACCTCGCTTGGCGAAAAAATGAGAGGAGACATAACGGAGGGAATCCGGGCGACTGGCCGTGACAACGATTGCACAGCTTGTGCG…	RVQITEQVHRQVGSSMVKIARDRRRELIALASKRLFESIDYDEVNDGGGEGVDDRANPVRETPFRDAPSVVVGGQKVGASNTLRRVMNDAAVDVATSHADRKAITTSLGEKMRGDITEGIRATGRDNDCTACAPGACLQSRPSTPLLGALDGTVDVGEGDNGSIQEQPHPNEFKPTNDGIIGINDGSTSFEGLSSTEEARTPYLESVLQASTEAFAGAHFAVSRMQSGVCAAGGPAVAVPTALTEEAAGADVAVSGSRVVNLRDNGKHEGARAITVHPEKLQRRYFEEEGRFSHSVLFGARSHNLKSSVAKTSGGKRKVRVCHTDKNINAGAIATMPATSPVESGQGCHSPDGDKSVPKGHAGVPHGLHSASSAECDPTQACTSRLISGGSSPSSPFHV…
Ec-sdr_f_000090	Esil-f_000090	F	GCCGAAGCCAGGCGCTTGAAGGAGCACAAGCGAACAGAAAAGTGGCGCATGATGGGCAACTTTGACAACTGGCGAAGTGGACGAAAAGCTAGTCGCCTCCGCAGTAAGGGTATCCCGGACTGTGTTCGTGGAAAGGTCTGGCAGATGATGATGGGATCAACGGCGATGATGGACAAGGAGCCGGACAGGTATGCAGATCTCGTGGCGAGCGACCTCCCGCCAATCGAGGAAGACATTCCCCGGACAATGTACGACCATGAACTGTTCTGCCGCAAGTCACGAGTTAACGGGAGAGAAATGCTGCGAAGGGTTTTGACAGCATACGGACGTTATGACAGAGAGGTGCAGTATTGCCAGGGCATCAACTACATATGTGCCTTGTTTCTGCTCTATATGCCG…	AEARRLKEHKRTEKWRMMGNFDNWRSGRKASRLRSKGIPDCVRGKVWQMMMGSTAMMDKEPDRYADLVASDLPPIEEDIPRTMYDHELFCRKSRVNGREMLRRVLTAYGRYDREVQYCQGINYICALFLLYMPEENAFWLLVASMHRPCAPLRELFLPGMVKVQEFQFVVDSLTEKHCRKLSAQILVNDLTPAMYATQWFLTAFTQRFPYELVTRVWDMFLLEDWKVFYRVCLALFKSVEEEATHLDLEKMNLLLRDMPAKVDAHK	Efas-f_000090	F	GCATCGAATAGGACTCGTTTGTCGCCAACAAAGGCAATGAAGCTTGGAAATGTCCAGTCGTTCGAACCGCACAAAACTCACCAACAAAGGTCAATCGAAAGTGATGGGGGCATTAGTGACACGAGCTCGGAACGGGATGCTGCCAGGATGGGCGTTTGTTCCGTGGAGAGCACCGCGAACCCGAAAAACTCCTCTTCGAAGGACGGTAGTAACATGCCTCCCATGGAGGACGTGATACAATCAACATCAGCAGACGCGAAGGTGTTATACAGGAACCCAGATGTGTGCGCGGAGACAGCATTAGGATACGCTTCCTCTGAGGATGAGCGCTACAACCCGTCGGTGCAGTATTGCCAGGGCATCAACTACATTTGTGCCTTGTTTCTGCTCTACATGCCG…	ASNRTRLSPTKAMKLGNVQSFEPHKTHQQRSIESDGGISDTSSERDAARMGVCSVESTANPKNSSSKDGSNMPPMEDVIQSTSADAKVLYRNPDVCAETALGYASSEDERYNPSVQYCQGINYICALFLLYMPEENAFWLLVASMHRPCAPLRELFLPGMVKAQEFQFVVDSLTEKHCRKLSAQILVNDLTPAMYATQWFLTAFTQRFPYELVTRVWDMFLLEDWKVFYRVCLALFKSVEEEATHLDLERMNLLLRDMPAKVDPHM									MP-f_000090	F	CCATCTTCCTCTTTTCTTTCCTCTCCTCCCTCTTCCCCTTCTTTTTCCCATCCCTCTTCTCCTTCTTCCTCTTCTTCCTCTTCTTCTTCCTCTTCTTCCTCTTCYTCWTCGCAGAATGGCGAGAAAAGAGGAGGTACGGGAGCAGGAGGGATGTTAGGGGGAGGGAGAGCTTTGCCACAGGGAACAAGTAAACAGTCTGCTATTAATGATGCTGTTATGGCTTGGAGTGGAGACAACAAAATTGAAGACAAAAAGAAGAAGAAACCGATCTTAACCAAGAAAGAAAAGGACAAAGGAAAGTGGCCTTTGCGTGCCCCCTCCCCGATAAGAAAAAAGAGCGGAGACGGGAGGTTGTTGGGGTTACTGACTGGTAGTGGATCTGCTGGGTTTGCGAGACCA…	PSSSFLSSPPSSPSFSHPSSPSSSSSSSSSSSSSSSSQNGEKRGGTGAGGMLGGGRALPQGTSKQSAINDAVMAWSGDNKIEDKKKKKPILTKKEKDKGKWPLRAPSPIRKKSGDGRLLGLLTGSGSAGFARPNQGRLTISPSSPELGSMGSDKPYVDKWGFVHDNPPLTPEPNQLQRSAEAEIELKWLKLTRKWKGQDHYSPKVHKKILKQCQLGIPMSVRGHVWKMLCNVDEYKRNYTGKYYQLLEDKENEDIATIEQIERDLNRTFPTHIRFREENGLGQQALGRVLKAYALYNPKLGYCQGMGFIAALFLMMMEEEDAFWCLVKMCLPGNGTYLDTQSLTRGYGMQGLFGDDLPMVWECVFVFEKLLKLYLPRLNAHLSAEDVVAGTYVPQYFIT…	UP-f_000090	F*	GTTGTTGGGGAGGCTGATGCGAGGGAACCGGTCGAGGAGTCCCAAATGGAGGAGGAGGAGCGTCAGAGCAGCGCCACCGTTTCCTCCCTTGGCATGCCGCGGGACGACAACGAGCCAACAGTGCCATCGACGAGCTGGGGCTTATTCACAGCGCCTAAGCGGGCCAAGGTCTCCAAGAGGGATTTGATGGAGATGCAGCCAGCGGTCACGGACCACCCGGGCTGCATCGAGCTGGATCCTTGCAGCGAGGAGGATTTGTGGCTCTGGCGAGCCAAGGAGACGCGCGACGATAGCGAGTTCAACGAATTCGATAAAGACTTGACCCGGCTGCTGGGCCTGTATTTCACGACTCAGGAGCTAAAGGAGGTCGGGATCAATCTGATAGAGGCCAGCGCGGCC…	VVGEADAREPVEESQMEEEERQSSATVSSLGMPRDDNEPTVPSTSWGLFTAPKRAKVSKRDLMEMQPAVTDHPGCIELDPCSEEDLWLWRAKETRDDSEFNEFDKDLTRLLGLYFTTQELKEVGINLIEASAAAKELFYRHVANNWSVFTISHTWTLVLAIRQGICETHRAAIWQLVVGSKSRQARYSNLYSKLRDSISNNEKAIVRDMHRTFPGDPYFAEKEGPGQKALYHVLNAYASFDHKVGYAQGMAFVVGFLLRYMEEESAFWVFVSLMQEEMYQLRLLYGPGIGGFHLMIYQVGRLVDRFMPEVNVHLNKEQFGPDVYVPPFIPSLFVGRVQQEVGARILDVFLAEGICVLPRLFLAILSINREQVLEQAPECVLGTLNTFCDELRDDEKLQR…
Ec-13_001800	Esil-13_001800	M	ATGTATGGTTGTCTTGAAGGCAAGCGGTGCTGGGCTGGGGTATATGTGGACATGGCAACAAACGAGATATGGCATCTCGAAACCGGGGGGCGCGTGTATCTCTCTCCTGGCACAGCTGCAGCTGATCCTCTACGCGGATGCTTGAGATGGTGGGCGGAGGAAGACCTACTGCACATGGCCGCTTGCAGTGAGAAGGTGTTCACTCGGTTTGACGTGGCCAGTGAAATTCGGCGCGATCCAGCACAAGCTGGAACACTTGCTGGGTTTACTGCGGAAGTCAGCTCAACAATCAATGCGGTGCGCGGAGATGGTTCTGCACCCGCCAACTCAGGTGGCATCGGCAAAATACGTCTCGTTCGCGACCCTTTCGGGTTTGTGTTTCCCGGCTGTATGTACGTG…	MYGCLEGKRCWAGVYVDMATNEIWHLETGGRVYLSPGTAAADPLRGCLRWWAEEDLLHMAACSEKVFTRFDVASEIRRDPAQAGTLAGFTAEVSSTINAVRGDGSAPANSGGIGKIRLVRDPFGFVFPGCMYVLSMQSGSSRKMANSDGVSVVLNGDGTVTSTAGGERVARWFFPWTKSLAGTNDELWASGNEVLLRFNTDFGQVGLTATAWEVGGSRDVTLSSSDGGRTWLPVSQCNSQSKLEKDCDDSRIILSLVTPVTLSMFPLTAAVSPLVHYLNEDNNFYQEMAPPIATLGNNLQPLVEVFEAQPIRLDGDHGGAPKNIEAIIVISRAVPRPTKXSTARVKAKEATVYITFEDKRFSVDFSFLHAPAPRHVRLGWPATESFGAVTRGFSQKAVG…	Efas-13_001800	M	GCAGCTGATCCTCTACGCGGGTGCTTGAGGTGGTGGGCAGAGGAAGACCTACTGCAAATGGCCGATTGCAATGAGAAGGTTTTCACTTGGTTTGGCGTGACCAGTGAAATGCGGCGTGATCCAGCGCAAGCTGGAACACTTGGTGGGTTTACTGCGGAAGTCAACTCAACACTCGTTCGCGACCCTTTCGGGTTTGTGTTTCCCGACTGTATGTACGCGCTGTCAATGTCGAGATCACCGCGCAAGGCGGCGAACAGCGACGATCTTCGTGTGGTACTCAATCGGGATGGAACAGTCACAAGTACGGCTGGTGGAGAGCGCGTTGCCAGGTGGTTTTTCCCTTGGAAAGAGCCTCTCGCCGGCACGAGTGATGATTCCTGGGCTTCGGGGAATGAAATA…	AADPLRGCLRWWAEEDLLQMADCNEKVFTWFGVTSEMRRDPAQAGTLGGFTAEVNSTLVRDPFGFVFPDCMYALSMSRSPRKAANSDDLRVVLNRDGTVTSTAGGERVARWFFPWKEPLAGTSDDSWASGNEILLRFNTDFDLLLSSSDGGRTWLLVERSSQSRLEDDRDDSRIVLSLVAPSTLSMFPLTAAVSPLVHYLNGDNNLQPLVEVFEAQPIRLDGGHAPKNIEAIILISRAVPRPT	SL-13_001800	M	CTGTGTTTGACTAATGGAGTCATGAAGTATGTGGACTTCAAATGGATTGCAACGGTCGCTACCCTCACATGCTTCGCGATCGGGGTCAAAGTGCGTTTGGAGGGGAATTCCAGGCGAAACGGAGGCGAGGTAGCCGCGACTTGCTGCAGGTCGCGACATCTGGGTCTTATTCCAGATCAAGTTGGCTGCATTCCAGGCACAAGCTGTTGGGCAGGGGTGTATGTGGACTGGACGAAGAACGAGGTACTGCACCTTGAACCTGGCGGGCGTGCATTCATCGATCCCGGCACAAGCACCGACTCTGGACGCGGGTGCCTGTGGTGGTGGGCACAGGAAAAATCACTGCACGTCGACGAGTGCAACGGCAAGTCCATCTCATGGCTTGGTGCGTCCGGCGAA…	LCLTNGVMKYVDFKWIATVATLTCFAIGVKVRLEGNSRRNGGEVAATCCRSRHLGLIPDQVGCIPGTSCWAGVYVDWTKNEVLHLEPGGRAFIDPGTSTDSGRGCLWWWAQEKSLHVDECNGKSISWLGASGEFQRASVQAGKLTGFEFSTRKGGARRQEMPKDDGIIVSKSRLTRDPFGFLFPGCLYALFMDSRPSRPGGKTEQALVVINRDGTVTNAASQESIASWAFVESGPITSTRDYSWVSGDSVFLLFKTDQSQPESRGASTAAKGETNAQLKLSSRDGGRTWLLVSRQGHEGLRTSDDVHSRIVLSLLAPTATSMFPLTPAVVPLVSYLSGSRPPDSGEEVVKPMPVLGDKVQPLLEVFEALPTRIGNNEGGSPQLFEAIIVISRAVPRPKR…	SJ18945	A	ATGAGATTTTCGCCTCCGGCGCACCTCCGGGGATCCTCCGAGGGCTCTCCGGGGCCCCCTGCGGGGGGCGCGCCTCGCCTCCGGCGCGTGGTGCGCGACGTGGTGCGCGTAGCGCACCACGCTGCACGGCAGAGCCCGCGACTTTCTCCACCAGACGATGACTGGAGCTCCCTTCAGGCACTGGAAGACAACTGCTGGGCAGGTGTTTATATAGATTCTGCAACGCACGAGTTATTGCACCTTGGAGTTGGAGGTCGTGCGTTTCGCTCCCCAGGATCAACAACTGTTGGCAGTCCCCAGCAGTGCTTGCGTTGGCGGGCAAAGGAGCGCTTCTTACATATTGCCGATTGCAACGATGCGAATTTCAGATGGCCTGGTACAGCGGGTGATCTGCGGCAA…	MRFSPPAHLRGSSEGSPGPPAGGAPRLRRVVRDVVRVAHHAARQSPRLSPPDDDWSSLQALEDNCWAGVYIDSATHELLHLGVGGRAFRSPGSTTVGSPQQCLRWRAKERFLHIADCNDANFRWPGTAGDLRQNPGHAGQLVGFGAEAKTNLVRDPMGFLFPGSMYTLSLTGDSRWRGGTHEMHVVINADGTVMSVASGLPIATWSFAETESLSGDTVDECWPAGDTVVLLVDAGYDENTHDGAAAGVVGAVHRFELSSADGGRTWIPMHRHSQARVLRRSDVRAHFSGGGSSGAVLSLMTPSAASIFPITPAVAPVVTYLRENKTQDFSPEDQSVMAAGDIKLQPIIEVFEAQPFRIGTVADGEHVSQDLEAIIVISRAVPRPTERRGDLSCVMNGAI…	MP-13_001800	A	TTGTCGATGCCTCGGACTCAAAGGGAAGGCGCCAGTAGGACATCTGCGAGCTCTTGTTTGAAGGTCGTGGCGTCCCTCATATCAACGGTGGCTCTGATAGCCATTCCGGTCAAGACTGGCTATTGGACACGAAATGGAAGACGTCCGGATCGGTTTGATGGACAGCAGACTGGAAGTCCAGGGCAGAGCGTGCGACTGTGTCTGCCAGCCAACGAGTCTGACTGCGTCCAAGAACAACAGACGAGAAGTTGGGCCGGCGTGTACGTAGATTCCGCAACGCAGGAAGTACTTCATCTCCAAACAGGTGGCGGCGCATCCCTTTCTCCAGGTGCATCAGATGACAGTCGCTCGGAATGCTTGCGGTGGAGGGCAGAGGAAGGTGCACTGCATTTATTTAAT…	LSMPRTQREGASRTSASSCLKVVASLISTVALIAIPVKTGYWTRNGRRPDRFDGQQTGSPGQSVRLCLPANESDCVQEQQTRSWAGVYVDSATQEVLHLQTGGGASLSPGASDDSRSECLRWRAEEGALHLFNCHGQTFTWPRAGGDVWRDSMQAGSGVGFGAEATTDGDEVFGDGQAHLVRDPFGFVFPGCAYLFSMHQWSPRNAVHEVRVVINHDGSVTDARSGGNIASWSFGGTDPVPGPGVESWATGDVVVLVIDTFYGQSQGLAAPGDGKEDLEFAVFTSDGGRTWLPVCGEIRPSLTNLAEEHISLRQEMCSFVTLALVAPTAVSLFPLTAATLSVTTYLHEGGPQRVLLDDQDSVGTGINKLPAIYEVLEVQPFRLSGRDGGDGDTPQDLEA…	UP-13_001800	A	TTGAACATGCATCGGACTCAGAGAAACAGCACCACTAGGACACCTGCCAGCGACTGCTTCAAGGTCGTGGCCTTTCTTTTTTCAATGCTGGTCCTGATAACCATTCAGGCCAAGACCGGATATTGGGCACGGAAGGAAAGACATCCGAATCGATGTGATGGACAGCGCAATGGAAGCCCGCTAGCCAGGGAGCCTGACTGCGTCCAAGAACAACTGGCGAAAAGCTGGGCTGGAGTGTACGTTGATTCCGCAGCGAACGAAGTACTTTATCTTGAAGCAAATGGCGGCGCATTTGTCTCTCCAGGTTCAGCGGCAAGAGACACTTGTTGGGATGGCTTGCGATGGAGAGAAGAGGAAGGTGTACTGCATTTAGTTGATTGCCACGGACGCCCTCTCACG…	LNMHRTQRNSTTRTPASDCFKVVAFLFSMLVLITIQAKTGYWARKERHPNRCDGQRNGSPLAREPDCVQEQLAKSWAGVYVDSAANEVLYLEANGGAFVSPGSAARDTCWDGLRWREEEGVLHLVDCHGRPLTWPGVNRNVWRESTHAGKFVGFDAEAITNEDEIPGNAQTHLVRDPFGFVFPGCVYLLSVRQRPPRKTVHEVRVVINRDGSVTEAEGGGKIGSWSFAGAEPLPCRGDESWATGDAVVLLIDNFYRQSQGFAAPADGEEDIEFALFTSDGGRTWLPVGGQSQAGTNMFSEEQHRFRQEKSSCVTLALVTPTAVSLLPLTSAMLPLTTYLQEGEAGGLLVLDQDSAATISNKLQPVFKVLEVQPFSLSGHNGGDGGTSQSLEAVIVISKA…
Ec-sdr_f_000060	Esil-f_000060	F	TGCATGTCAACCAACGTGGCAGTCATTGCTTGACTCTCTTCCGCAGTGTGCGGCAGGACGTCCGACTGTCTGCGCCAAGCGAGGAGTTTGGCTGCGTCAGCCAGAAGTGTTGGGCCGGAGTGTACGTTGATTCTACGTCGAAGTCGGTGTTGCACCTGGCAAAGGGAGGCGGAGCTTTCTTCTCTCCTGGCACAGCCGCTGGCTCCCATGGGAACGAATTGCGGTGGAAGGCGAAGGAAGATTTCCTATACATTATCGATAGCGATAACAATCCATTTTCGTGGCCTGGTGCTGCGTCTTACCTGCGGCGCCATCCTGCGCAAGCGGGGAAGCTGGCTGGTTTCCGTGTGGGAGTCGGAACAAGTAACGGCACAGGACTTGTTAAAAGTGCGCATCTGA…	LTLFRSVRQDVRLSAPSEEFGCVSQKCWAGVYVDSTSKSVLHLAKGGGAFFSPGTAAGSHGNELRWKAKEDFLYIIDSDNNPFSWPGAASYLRRHPAQAGKLAGFRVGVGTSNGTGLVKSAHLNRDSLGFLYPGCTYVLSWRPGLPFRAGNARENRVVVNRDGTITDAENGRRVARWSFPKAPPVVDGVDDTWATGDEVVLLLDGEYLQFEGAGSADGRSNRKFELSSPDGGRTWVPPLTRFQTQVKPVPDICDHPGRPEGCVALALVLPADVSMLPLTSAMQPIARYLSGRDAQERVEDKEMTASGGDILQPIVSIFDAQPYRSGSGHEDMPQQFEALIVISRAVPRPTKANEDLSCVVNGIPSRASWLSWSMILCSTAHIKRETTLYIAFRGRPFSL…	Efas-f_000060	F	CAGAGGTGTTGGGCGGGCGTGTACGTTGATTCTGCGTCCAAGTCGGTGTTGCACCTGGCAAGGGGGGGCGGCGCTTTCTTCTCTCCCGGCACAGCCGCTGGCTCTCACGGGAACAAATTGCGGTGGAAGGCGAAGAAAGATTTCCTGTACATGGTCGATAGCGATAATAAGCCATTTTCGTGGCCTGGTGCCGCGTCTTACCTGCGTCGTGATCCTGTGCAAGCGGGGAAACTGGCTGGTTTCGGTGTGGAAGTCGAAACAAGTCTTAGTCGGGATTCCTTGGGCATTGTATATCCTGGTTGCACTTACGTGCTATCGTGGCCTGGACAACCATTCAGGGCTGAAGATGCCCGCGAAAATCGCGTAGTGGTTAACCGAGATGGGACGATCACGGATGCA…	QRCWAGVYVDSASKSVLHLARGGGAFFSPGTAAGSHGNKLRWKAKKDFLYMVDSDNKPFSWPGAASYLRRDPVQAGKLAGFGVEVETSLSRDSLGIVYPGCTYVLSWPGQPFRAEDARENRVVVNRDGTITDAEDGRQVARWSFPEPTPVVDIGDNSWATGDEVVLLLDGDYKFKLSSPDGGRTWVPLHCQTRVKPIPDCDPARVVLALVLPADVSMFPLTSAMQPIASYLNGAEALQPIVSIFETQPYRSGSGDMPEQLEALIVICRAVPRPTKTNEDLSCVINGIPSRASWLSWSMILCSTTHIKPKTTLYIAFRGRPFSWEATFR	SL-f_000060	F	GATCACTTGCAGCGCGATATTGCGCATGCTGGCAAACTCTCCGGATTTGACGGAAGAGAAAAAACCAGTGACCGTGGAAGATACGGAGACGATGGTGATCTTCTTCGCGACCCCCTGGGGTTTATGTTTCCTGGCTGCACCTATTTGCTGACGGTGAAACCTGATCAGCCATGTACGGTTGGCATTGGCCATGAGTATCGCGTCGTGGTCGACAGAGATGGGACTGTCATCGACACCGCGAACGGAGGGATGGTCGCTCGATGGTACTTCCCGGGAATGCCACCTCTTTCCGGCGCTGGCGACAAGTTGTGGCCGACTGGTGATGAAATCTTGCTGCTGTTCGAGAAAAGTCACCACCAGCTCCGGTCAGTGGTTTCAGCTCCGGGAGGCGACGCTGCT…	DHLQRDIAHAGKLSGFDGREKTSDRGRYGDDGDLLRDPLGFMFPGCTYLLTVKPDQPCTVGIGHEYRVVVDRDGTVIDTANGGMVARWYFPGMPPLSGAGDKLWPTGDEILLLFEKSHHQLRSVVSAPGGDAACEFKLSSLDGGRTWRPVTTYGQAEEKVVHGVDDLILLTLVIPSAVSMFPLTSALRPLERYLNGGRARKFSLEENETFSPDERKIEPIVQIFEAQPFRYGGNDGGTAEFQAVIVISRAVPRPERKEDLACVVNGIVTRAVWLSWSMVLCSSAHVMEEEATLSMTFRSERFSSEVTFRRAPPPRHVRLAWPPVETFDLLPRGDIQMQSRHRALLPLRNATNSGPEIRPFRTTIALCTMFKNEARYLGEWLRYHKRLGVSKVYMYDNGS…
Ec-13_001810	Esil-13_001810	M	ACCAGGTACGCTGTAAAGGAGTCGACCCTTTTGTCATTCCCACAGGTCGAAATGCCCCGATTCGGTGACCAAGACTCAAAACCCTACAGGCGCCGGGCGTCTCATGCTGGCACATGGTACTCCGATAGTGGGCCTCTATTAGGGCAGCAACTGACCGATTGGCTCGGATCTTCGGCGCAGACGACTAAGCCCGGGAGTGCTGTTCGCGCCATCATCGCTCCGCATGCAGGGTTCAGTTACTCGGCACAGACCGCTGCTTCTGCCTACGCGCATATGGATCCTTCCAAGTTGGCTAGGGTTTTTGTTCTCGGACCTTCTCATCATGTTCACATGCGAAGATGCGCCGTGTCCACTGCATCTCGTCTGGAGACTCCAATAGGCGACCTCGCAATCGACCAG…	TRYAVKESTLLSFPQVEMPRFGDQDSKPYRRRASHAGTWYSDSGPLLGQQLTDWLGSSAQTTKPGSAVRAIIAPHAGFSYSAQTAASAYAHMDPSKLARVFVLGPSHHVHMRRCAVSTASRLETPIGDLAIDQDVTRQLLASGQFEAMTQHIDEEEHSIEMHLPFIKKVMEGRPCTVVAIMIGALSAELEQHYGRILAPYLEDLTNFFVISTDFCHWGSRFRYQPLGAAHSAIHEHISWLDHEGMKLIQSQDAVGFRRYLAEHGNTICGRHPIATFINAMEASTVCICVAWVKYAQSSKVISPQDSSVSYASAVLTQNKCS	Efas-13_001810	M	CTGCAGGTCGAAATGCCCCGATTCGGTGACCCAGACTCAAAGCCCTACAGACGCCGGGCTTCTCATGCGGGCACATGGTACTCCGATAGTGGACCTCTGCTAGGGCAGCAACTG	LQVEMPRFGDPDSKPYRRRASHAGTWYSDSGPLLGQQL	SL-13_001810	M	GTCGCCGACTTCATCAGCTGGGAACCAGAGTCAGGAACGTTGAACAGCCCATCAGATCAACCAGGTCCAATGGCCCGACGCGGCAATCCCCACCCTCAGCCCTACAGACGCCGCGCTTCCCATGCTGGCAGCTGGTACTCAGAAAACGGCGTTCTTCTAGGGCGGCAACTTTCAGGTTGGCTTGGAGACTCAGCAAGCGGGGTTGTGCCAGGGCCTGCTGCTCGCGCCATCATCGCGCCCCACGCAGGATTCAGCTATTCCGCACAGACGGCCGCTGCGGCTTACGCGCACATGGACCCTTCCAAGTTGGCAAGGGTGTTCATTCTTGGCCCGTCTCATCATGTGCACATCAGAAGGTGCGCCGTGTCAACGGCAACTTGTCTGGAGACGCCCATCGGC…	VADFISWEPESGTLNSPSDQPGPMARRGNPHPQPYRRRASHAGSWYSENGVLLGRQLSGWLGDSASGVVPGPAARAIIAPHAGFSYSAQTAAAAYAHMDPSKLARVFILGPSHHVHIRRCAVSTATCLETPIGDLTIDQDVNRQLLDTGHFDVMTSRMDEDEHSIEMHLPFIRKVMEGRECKIVAIMVGALSARLEQQYGRILAPYLEDSANFFIISSDFCHWGSRFRYQPLNAAHGAIHEHISWLDHEGMGLIQSQDAARFQQYLEEHANTICGRHPIAVFLNAIEVSPTRFRVTWVKYAQSSKVISLEDSSVSYASAIVTQDFCA	SJ13722	A	ATGACACGGCTTGCCAGTGCTTCGGGAGAAGCGGGCTGCACTTACCGACGCCGAGCATCACACTCCGGTTCCTGGTACACGGACGATGGGCAGCTCTTGGATCGGCAGCTGGCAGGCTGGCTCGCAGCTGCGTCTCCAGGAGCCGTGCCGGGAACCGTTCGCGCCGTAATCGCTCCGCACGCTGGTTTCAGCTACTCAGCCGAGACTGCAGCGTTCGCGTACTGCCACATGGACCCGGCGAGGATACGGACAGTGTTCGTACTGGGGCCTTCTCACCACGTCCACCTCCGGGGCTGCGCAGTTTCAACGGCCTCGTGCATGGAGACTCCCGTTGGCGACCTCGCCATCAATCAGGAGGTGACTCGGGCGCTGCTTTCGTCCGGGCAGTTTGACGCAATG…	MTRLASASGEAGCTYRRRASHSGSWYTDDGQLLDRQLAGWLAAASPGAVPGTVRAVIAPHAGFSYSAETAAFAYCHMDPARIRTVFVLGPSHHVHLRGCAVSTASCMETPVGDLAINQEVTRALLSSGQFDAMTQRVDEDEHSIEMHLPFIKKVMEGRRCNVVAIMVGALTEATEESCGRVLAPYLDDPANFFVVSSDFCHWGSRFRYQPRDPARGPIHEYIRWLDHQGMTCIQSQDIKGFGRYLAEHANTICGRHPIGAFMNAMKFSSAGFSVAWVKYAQSSKATSSQDSSVSYASAVVTLA	MP-13_001810	A	GAAGCTGGCGGTGGACATCTGACTGATAACATCTATACTATTATTGTTGTGAGGATTGAGGCTGGAGGGAGTGACAGAAAGCTTCTGAGGAACTATTGCTCCTCATTTTTGAGCACTTCCTTCTTGTGTACGTCAGCAAAACATCATATTCGAGTACCTGGTACTGCTGCTGGCGACATCTCAATGACCCGGCATGCCAGGGCTTCGGGAGAAGGGGGCCGTACTTACCGACGCCGAGCATCACACTCCGGTTCCTGGTATACAGACGATGGGCATCTCTTGGATCGGCAACTGGCAGGTTGGCTCAGGGCTGCATCTCCGGGGGCCGTGCCGGGGACCGTTCGCGCCGTAATCGCTCCGCACGCTGGTTTCAGCTACTCTGCCGAGACCGCAGCCTTC…	EAGGGHLTDNIYTIIVVRIEAGGSDRKLLRNYCSSFLSTSFLCTSAKHHIRVPGTAAGDISMTRHARASGEGGRTYRRRASHSGSWYTDDGHLLDRQLAGWLRAASPGAVPGTVRAVIAPHAGFSYSAETAAFAYCHMDPTRVRTVFVLGPSHHVHLRGCAVSTASCMETPVGDLAINQDVTRALLSSGHFDAMTQRVDEDEHSIEMHLPFIKKVMEGRSCNVVAIMVGALAETTEASCGRVLAPYLDDPANFFVVSSDFCHWGSRFRYQPCDPAHGPVHEYIRWLDHQGMTLIQSQDIKGFGRYLAEHANTICGRHPIAAFMNAMKCSSAGFSVAWVKYAQSSKATSPQDSSVSYASAVVTLA	UP-13_001810	M	TTTCAGGAGTGTGGCAAAGGCGGGCTGAGAAGGCAAGATCGGGCAAGGCCACCATTGGGACCGAGATACCCCACCGAGGTGCACCATTACCAGCAGGATCTTCTACGAGGAATTATGTCTGGTACCATGGAACAGCACAGCGGGTCAGCGCCGCAGGTGTATGCTGGCTATCGACGCCGGGCATCCCATTCTGGCACGTGGTACTCTGACGACAGCCAGCGATTGCGTCAGCAACTTGCAGGTTGGCTTGGACTCGAAGCCCGGAGGACCGTGCCGGGAACTACCCGGGCCGTCATCGCCCCTCACGCGGGGTTCAGCTTCTCCGCACAGACTGCTGCCTCTGCGTATGGTCACATGGATCCAGCCAACGTGGCAAGGGTTTTTGTTCTCGGGCCATCT…	FQECGKGGLRRQDRARPPLGPRYPTEVHHYQQDLLRGIMSGTMEQHSGSAPQVYAGYRRRASHSGTWYSDDSQRLRQQLAGWLGLEARRTVPGTTRAVIAPHAGFSFSAQTAASAYGHMDPANVARVFVLGPSHHVPMRGCAVSTASRLETPIGDLIVDQDITSQLLETGHFEEMTPRMDEEEHSIEMHLPFIRKVMEGRACEVVAIMVGELSSQLEQQYGRILAPFLGDASNFFVISSDFCHWGSRFGYQPRNPSHGDVHEYIRWLDHEGMTLIESQDAAGFGQYLARHSNTICGRHPISLFLHAMKASTTSFSISWVDYAQSSRVTSLQDSSVSYASAVITQEEDA
Ec-sdr_f_000150	Esil-f_000150	F	GATCCGGCGGGGATCGCGACGATATTTGTTCTTGGGCCGTCGCACCATGTTCACCTCCGGGGCTGCGCCGTGTCGAAAGCCTCCTGCCTCGAGACGCCACTTGGTGACCTACCTGTCAATCATGACGTCACACAAGCGTTGCTTGCCTCTGGGCAGTTTGAAGCAATGACACAACACATCGACGAGGAGGAGCACTCCATCGAGATGCATTTGCCCTTTATTAAGAAGGTTATGGAACAGCGAGCTGTCAGCGTTGTGCCCATTCTGGTCGGGGCTCTTTCTGAGCGGAGGGAGGAGTTCTACGGCAGGGTTCTGGCCCCGTACATGGATGACTCTTCCAACTTCTTCGTAATCAGCTCGGACTTTTGCCACTGGGGATCACGTTTTCGTTTCCAGGCG…	DPAGIATIFVLGPSHHVHLRGCAVSKASCLETPLGDLPVNHDVTQALLASGQFEAMTQHIDEEEHSIEMHLPFIKKVMEQRAVSVVPILVGALSERREEFYGRVLAPYMDDSSNFFVISSDFCHWGSRFRFQAHDPTHGAIHDHIHWLDHQGMMLIQAQNAVGFGQYLAEHGNTICGRHPIAVFMNAINMSSTNFSVAWVKYAQSSKVISPQESSVSYASAVVTDFVSSQHVSKSPQPEPASI	Efas-f_000150	F	ATGGATGCGGCGGAGATAACGACAATATTTGTTCTTGGGCCGTCTCACCATGTTCACCTACGGGGCTGTGCCGTGTCAAGAGCCTCCTGTCTCGAGACGCCACTTGGTGATCTACCTGTCAATCATGACATCACACAAGCGTTGCTTGCCTCGGGGCAGTTTGAAGCAATGACACAACACATCGACGAGGAGGAGCACTCCATCGAAATGCATTTGCCATTTATTATGAAGGTTATGGAACAGCGAGATGTCAGCGTCGTGCCCATACTGGTGGGGGCTCTTTCAGAACGGAGGGAGGAGTTCTATGGCAGGGTTCTGGCCCCGTACATGGACGACTCTTCCAACTTCTTCATAATCAGCTCGGACTTTTGCCACTGGGGATCACGTTTCCGTTTCCAG…	MDAAEITTIFVLGPSHHVHLRGCAVSRASCLETPLGDLPVNHDITQALLASGQFEAMTQHIDEEEHSIEMHLPFIMKVMEQRDVSVVPILVGALSERREEFYGRVLAPYMDDSSNFFIISSDFCHWGSRFRFQAHDPTHGAIHDHIHWLDHQ	SL-f_000150	F	TTAGGCACCGAAGCCCCGATCTTCGGTCCCTCTCGTCTCCACGTTTTTCGTGCGGAGCAACCAACAACACCAGCTCTCGGAATGGCACACCAGCTTCATCACACAGCAGGCGAAGCTGGCATCTACCGCCGCCGGGCATCGCATTCAGGCTCTTGGTATACAGGCGATGGGCATCTGTTGGATCGTCAACTCACAGACTGGCTCCAACATGCATCTCGGCAAACGGTGCGCGGAACGGCTCGAGCTGTTATTGCTCCTCATGCTGGCTTCAGTTACTCCGGGGAGACAGCAGCCTTCGCATATTCCCACATGGACCCAGCAAAGGTTGCGACGGTCTTTGTTCTCGGGCCATCTCACCATCTTCACCTGCGGGGCTGTGCGGTGTCAACAGCCTCTTCT…	LGTEAPIFGPSRLHVFRAEQPTTPALGMAHQLHHTAGEAGIYRRRASHSGSWYTGDGHLLDRQLTDWLQHASRQTVRGTARAVIAPHAGFSYSGETAAFAYSHMDPAKVATVFVLGPSHHLHLRGCAVSTASSLETPIGDLPINHEVTQALLATGHFEAMTPGVDEDEHSIEMHLPFIKKVMGQRTCNVVAIMVGALSERREGFYGRILSPYLDDPSNFFVVSSDFCHWGSRFRFQSHNPSHGAIHEHIHWLDQKGMAIIKSQDVEGFGQYLAEHKNTICGRHPISVFMNALTDSATNFGVTWVKYAQSSKVISPQDSSVSYASAVVTQDCQPI									UP-f_000150	F	CGCTCAGGAACTCGAACATTCCGTATCACCGCCTTCTGGATTAGATCGATTTTGCTGCATCATCTTCTTGTGCTGGTGGTTCTCACGCAGTACGCGGCATTGGCCATCCCGCACAAATTGTTCTCCGACATTCTTCGACTTCAAGCTACCTGTTGGGCTTTCTCGATGACACAGCTTACTTTTGACAGTGCTTCGGGAGAGGCAGGCTGGACTTACCGACGACGAGCGTCACACTCCGGGTCCTGGTACACGGACGATGGGCATCTCTTGGATCAGCAACTCACAGGTTGGCTCGGAGCTGCATCTCCTGGGGCCGTGGCTGGGACCGTTCGCGCCGTGATCGCTCCGCACGCTGGTTTCAGCTACTCTGCCGAGACCGCAGCCTTCGCTTACAGCCAC…	RSGTRTFRITAFWIRSILLHHLLVLVVLTQYAALAIPHKLFSDILRLQATCWAFSMTQLTFDSASGEAGWTYRRRASHSGSWYTDDGHLLDQQLTGWLGAASPGAVAGTVRAVIAPHAGFSYSAETAAFAYSHMDPARVGTVFVLGPSHHVHLRGCAVSTASCMETPIGDLAINQDVTRALLLSGQFDAMTPRMDEDEHSIEMHLPFIKKVMGGRCCNVVAIMVGALTETAEESCGRVLAPYLDDPSNFFVVSSDFCHWGSRFRYQPCDPTHGPIHDHIRWLDHQGMSLIQSQDVKGFGTYLAEHANTICGRHPIAAFMNAMKLSSTGFSVAWVKYAQSSKATSPQDSSVSYASAVVTEERFL
Ec-13_001830	Esil-13_001830	M	ATGAAGCGAACGTTATTTTATATGCTGGGCGCATGCATAGGTCCGCATGCATCCGCCTTCGTACCAGCGGCAGCACTAAGTCGGAGAGCAATAGTGCAACAACGCTGCCTCCAACATGCGCTGTCTATGCCAACGGAGCCCCAGCCTGAGCCCCAACCGGACCAACCAGTCCCACCTCGTCGGACGCCGGTGCCGATGCCCACTGTTGGAGAAGGAAGTGAGCAAATGGACGTTATGTCAAGGTTATTGAAGGATCGCATTCTTCTTCTTGGGCAAGAGGTGAACGACGAAGTGGGGAACGTGTTGGTTGCTCAGCTACTGTATCTGGCGAACGACGATCCGGAGAAGGACATCACACTCTACATCAATTCTCCGGGAGGTTCTGTGTCGGCGGGCCTG…	MKRTLFYMLGACIGPHASAFVPAAALSRRAIVQQRCLQHALSMPTEPQPEPQPDQPVPPRRTPVPMPTVGEGSEQMDVMSRLLKDRILLLGQEVNDEVGNVLVAQLLYLANDDPEKDITLYINSPGGSVSAGLAIYDTMHAVHPM	Efas-13_001830	M	TTGGTACCGATGGTGATCGAGAAGTCCGGACGCGGCGAACGCGCCTACGACATCTTCTCCCGCCTGCTCAAAGACCGGATCATCTTCATGAACGGCCCGGTCACCGACACAATGACCTCCCTGGTCACCGCCCAGCTCCTGTTCCTCTCCAACGAGGACTCGGAGTCCGACATCCACTGCTACATCAACTCGCCCGGCGGCAGCGTCTCGGCGGGACTGGCGATCTACGACACCATGCAGTTCGTCCGCCCGCAGATCGCGACCTACTGCATCGGCATGGCCGCGTCGATGGGCTCGATCCTGCTGATGGGCGGAAACGCCGGCAAACGCTACGTCCTGCCCAACTCCAAGGTCCTGTTGCACCAGCCCCTGCTCGGCCGCCAGGGTCAGGCCACCGAC…	LVPMVIEKSGRGERAYDIFSRLLKDRIIFMNGPVTDTMTSLVTAQLLFLSNEDSESDIHCYINSPGGSVSAGLAIYDTMQFVRPQIATYCIGMAASMGSILLMGGNAGKRYVLPNSKVLLHQPLLGRQGQATDLAIEAKEMLKTRDRLYKIIQQHTGQGYDKIKEDCERDYWLDAEEAVEYGCADQVLKHLPE	SL-13_001830	M	CACCGGCCAATGCCCTATCGGAGATCTCGTGTACTAAAGACAGAGACAGACCATAATTCAGGGGGTGGAAACTCAGGGATAATTTCTTATCCTCCCCTTGTTTATCACGTGCTCGATGTGCGCGGTTGGATTTCACCCTCTCACGCGCACATCCTCTCGTGTGTCACTGCCCTCATCTCGCAGCAGGCAGCAGTTTATATCTTCATGAGAGGGAGCGGCAGGATGCACGGGCGTGCCCTTATCGCTGCCTTGGTGATGGCGTCGTTTGGGCTTCAAGCCTCCTCGTTCATTCCTGCGGTGCCATATCGGAGAACGGGTGTGTCACGGTTCGGATCCATGTCAGACCCTTCGCCTGACACGCAGCCAGATCAGTCGCCCCCACCTCCCCGACGCATTGCT…	HRPMPYRRSRVLKTETDHNSGGGNSGIISYPPLVYHVLDVRGWISPSHAHILSCVTALISQQAAVYIFMRGSGRMHGRALIAALVMASFGLQASSFIPAVPYRRTGVSRFGSMSDPSPDTQPDQSPPPPRRIAVPMPTVGEGRDQMDVLSRLLKDRILLLGQEVNDEVGNVLVAQLLYLANDDPERDITLYINSPGGSVSAGLAIYDTMQFIPCDVATVCFGMAASMGAFLLGAGSPGKRKSLPNSRIMIHQPLGGAAGQAADIEIQAKEILFTKRLLNGYMSEYTDQPADKIEEDTDRDFFMTPYEAMDYGLIDEVIRTKTSDLPLPTMPSLG	NA				NA				NA
Ec-sdr_f_000080	Esil-f_000080	F	ATGAAGCGAACGTTATTTTATATGCTGGGCGCATGCATAGGTCCGCATGCATCCGCCTTCGTACCAGCGGCAGCACTAAGTCGGAGAGCNNNNNNNNNNNNNNNNNNNNNNNNNNNNNNNNNNNNNNNNNNNNNNNNNNNNNNNNNNNNNNNNNNNNNNNNNNNNNNNNNNNNNNNNNNNNNNNNNNNNNNNNNNNNNNNNNNNNNNNNNNNNNNNNNNNNNNNNNNNNNNNNNNNNNNNNNNNNNNNNNNNNNNNNNNNNNNNNNNNNTGGGCAAGAGGTGAACGACGAAGTGGGGAACGTGTTGGTTGCTCAGCTACTGTATCTGGCGAACGACGATCCGGAGAAGGACATCACACTCTACATCAATTCTCCGGGAGGTTCTGTGTCGGCGGGCCTG…	MKRTLFYMLGACIGPHASAFVPAAALSRRAXXXXXXXXXXXXXXXXXXXXXXXXXXXXXXXXXXXXXXXXXXXXXXXXXXXXXXXXXXXXGQEVNDEVGNVLVAQLLYLANDDPEKDITLYINSPGGSVSAGLAIYDTMQ	Efas-f_000080	F	CTTGTTCCCGTCGTTATTGAGCAATCCAACCGCGGAGAGCGTAGCTTTGACATTTTCTCACGGTTGCTGCGGGAGCGCATTGTTTTCGTAACTGGGCCGGTAGAGGATGGGATGGCTTCGATCATTACAGCGCAATTGCTGTTTCTGGAGTCGGAAAATCCGAAGAAAGACATTTATCTCTACATCAACTCCCCCGGCGGAGTCGTAACTGCTGGCATGGCGATCCACGATACTATGCAATATATCCGACCTCGCGTTGGTACGGTCTGTGTTGGTCAGGCTGCTTCTATGGGCAGTTTCCTGCTAGCATCCGGTGAACCGGGCATGCGTATGGCTACAACCAATGCCCGCATCATGGTGCATCAACCTTCTGGTGGCGCACAAGGCATGGCATCTGAT…	LVPVVIEQSNRGERSFDIFSRLLRERIVFVTGPVEDGMASIITAQLLFLESENPKKDIYLYINSPGGVVTAGMAIHDTMQYIRPRVGTVCVGQAASMGSFLLASGEPGMRMATTNARIMVHQPSGGAQGMASDIEIQAKEILRIRSRMNELYAKYTGKPIKEIEKAMDRDTFLEADEAKAFGLVDEVYDKRPK	SL-f_000080	F	TCCAAAGGCTAGCCAAAAAGCGGAAGGGAACGTGGGCAGGCCAAGCCAGAAGCACTTTGCCCTCACAATATGAAGTGTAGTATGTTGCATCTACTATTGGGGACGGCCCTTTCGTCTGCATCCGCGTTTATACCTGCGTTGCCAAGTTCTCGGATGGTGGTTACCCAACCACGCTGCCGGGCACGCTCATTATCGATGCCTGCAGAACCACAGCCGGAGACCCAACCAGACCAACCAGCCCCAGCTCGGCGCACCCCGGTTCCGATGCCCACCGTTGGGGAAGGAAGAGAACAGATGGACGTCATGTCGAAGCTGCTGAAGGACCGCATCTTACTCTTGGGACAGGAAGTCAACGACGAGATCGGGAACGTGTTGGTGGCGCAGCTGCTGTACCTTGCG…	PKSGRERGQAKPEALCPHNMKCSMLHLLLGTALSSASAFIPALPSSRMVVTQPRCRARSLSMPAEPQPETQPDQPAPARRTPVPMPTVGEGREQMDVMSKLLKDRILLLGQEVNDEIGNVLVAQLLYLANDDPEKEITLYINSPGGSVSAGLAIYDTMQFIPCDVATVCFGMAASMGAFLLGAGCPGKRKSLPNSRIMIHQPLGGAAGQAADIEIQAKEILFTKRLLNGFMSEYTDQPAEKIEEDTDRDFFMTPHEALEYGLIDEVIKTKTSHLPLPQMPFLV	SJ-f_000080	F	ATGCCCACCGTGGGGGAAGGACGAGAACAGATGGATGTAATGTCGAGGTTGCTGAAAGACCGCATTCTACTGCTGGGACAAGATGTTAACGACGAGGTCGGAAATTTCATTCCGTGTGACGTTGCCACAGTCTGTTTCGGCATGGCAGCGTCTATGGGAGCCTTTTTGTTGGGAGCAGGAAGCCCCGGCAAGCGCAAGTCTCTCCCGAATTCCCGAATAATGATTCATCAACCGCTGGGTGGAGCGGCTGGTCAGGCAGCAGACATCGAAATCCAG	MPTVGEGREQMDVMSRLLKDRILLLGQDVNDEVGNFIPCDVATVCFGMAASMGAFLLGAGSPGKRKSLPNSRIMIHQPLGGAAGQAADIEIQ	MP-f_000080	F	ATGGTTATCGAGCAGACTGCGCGGGGAGAGCGTTCTTTTGATATCTATTCGCGCTTGCTGAAGGAGCGTGTAATTTTTCTAGTTGGTCAAGTCGAAGATCACATGGCGAATCTGGTTGTTGCCCAATTGTTGTTTTTGGAGTCAGAGAACCCAGATAAAGATATCCATCTGTATATCAATTCTCCTGGTGGTTCGGTTACGGCAGGTATGTCGATTTACGATACTATGCAGTTCATCAAGCCAGATGTTTCGACGCTTTGTATTGGTCAGGCATGTAGCATGGGCGCATTATTGTTGACTGGTGGCGCGAAAGGGAAGCGTCATTGCTTGCCGCACTCTCGAATGATGATTCATCAGCCTCTTGGTGGTTATCAGGGTCAAGCGACAGATATAGAGATA…	MVIEQTARGERSFDIYSRLLKERVIFLVGQVEDHMANLVVAQLLFLESENPDKDIHLYINSPGGSVTAGMSIYDTMQFIKPDVSTLCIGQACSMGALLLTGGAKGKRHCLPHSRMMIHQPLGGYQGQATDIEIHTKEILTIRDKLNNIMADHTGQDIKTISKDTDRDNFMDGSEAVEYGLIDSMLDKRSGDD	UP-f_000080	F*	ACTGCGGGATTAGCCATATACGACACTATGCAGTTTGTACAATGCGATGTTGCTACATATTGTATTGGGCAAGCAGCAAGTATGGGAGCTATTCTTCTTGCAGGAGGAACTGCAGGCAAACGCCATGCATTGCCACATGCTCGCATCATGATTCACCAACCATGGGGTGGAGCAAAAGGAACAGCAAAAGATATCTTGATCAATGCAGAAGAAATACTAAGATTAAAAGATAAACTATATGGTATTTTATCTGATCACTCAGGCCAATCTCAAGAAAAGATTAACAGGGATTCCGACAGAGACTTTTATATGTCTTCCATACAAGCTAAAGATTATGGTTTAGTTGACCAAGTTGTTGGAACTTTAAAAGGCGATCAAAAATAA	TAGLAIYDTMQFVQCDVATYCIGQAASMGAILLAGGTAGKRHALPHARIMIHQPWGGAKGTAKDILINAEEILRLKDKLYGILSDHSGQSQEKINRDSDRDFYMSSIQAKDYGLVDQVVGTLKGDQK
Ec-13_001840	Esil-13_001840	M	ACTGCACGAGCATATACGCTCTTAGCATATATTCTTGGTGGTACATGCCAGATCAATGCTGCTGTTCTGATCCAGTACGAGTTCTCCCAAGAGGAATGCCGCCGCGGCGTCGTTGCCGATGTGTCCGGAGGAAACCGATTCTTCGGTGATCTTTCGCTTGACAATTCGACAGCATTATGCTTGCCAGGCGTAGGCATAGAGCGGACTTCGGCCTCACCAGGATCACCAGGTGCCTCATCTATTGGAAATACAACACTACTGCGGGAAGAGCTGCTCAACGATGATTCTTCTCCAGGTCATTTCTCGCTGGAGTTATGGCTGAGTGTTCCAGAGATGCCGGCATGCGATGGTTTTTGCACCACTCCCATCGTGACCATCGGGGAGAGCGATACTAGCCTC…	TARAYTLLAYILGGTCQINAAVLIQYEFSQEECRRGVVADVSGGNRFFGDLSLDNSTALCLPGVGIERTSASPGSPGASSIGNTTLLREELLNDDSSPGHFSLELWLSVPEMPACDGFCTTPIVTIGESDTSLDDDCQQNLGMMITYWTETGDFGARFMSIDDECERLWSGAIQPSESMGYALHLVLTIDSIVFFGQPYAYFRWYINGTRVARDLSKDVPPETMMTLWDSDFNLQLLDWSRQIPSSFYTEGPGIKIFYLAIHDETLGVTEILSRYSARITNSTPVVSDTTIGVAEDGEEGDHYEDPQSYLQVFPVSELQMVPLDVYDSDNDPATPNCDNSTSPRVFVNTLPFPGSLVNSSGDDISSVPFEVLGDAGAFAVRYRPILNDFSTNDSVVYAN…	Efas-13_001840	M	GCTACGAAGATACTCTCAAGATATTCTGCTCGTATCACCAATAGTACTCCAGTGGTTAGCGATACAACCATTGGTGTTGCTGAAGACGGTGAAGAGGGGGATCACTATGAAGACCCTCAGTCCTACCTTCAGGTATTTCCGGTGTCGGAGCTCCAGATGGTTCCCCTCGACGTTTATGACTCAGACAACGATCCTGCAACGCCCAACTACGACAGCACGAGCCCGAGGGTATTCGTGTCCACACTGCCATTTCCGGGCTCCCTTGTGAATTCGTCGGGTTATGATATCAGCTCCGTACCGTTCGAAGTTCTCGGAGATGCTGGGGTGTTCGCCGTGAGATACCGGCCCATTTTGAACGACTTCTCCACCAACGATTCGGTCGTGTACGCCAATTTTTCG…	ATKILSRYSARITNSTPVVSDTTIGVAEDGEEGDHYEDPQSYLQVFPVSELQMVPLDVYDSDNDPATPNYDSTSPRVFVSTLPFPGSLVNSSGYDISSVPFEVLGDAGVFAVRYRPILNDFSTNDSVVYANFSFYATDGESGTRSHTNATVSMYVFSKNDPPEAFNASHGVYAGSRQNIIPLHGTDMDAFDDVHGAAIVEPPARGTLFQV	SL-13_001840	M	AAACCACGCCATGACGTAACGTCGCCTCTGCCAACAGATATGATTCCAGGAATGTTTACGATCCTAGTGCTGCACGTTCTGCACTTTGTTTGCGATGCAAATGCCGCTGCAATAATTCGTTATGATTTTTCCCAAGTTGAATGTGGACAGTCCAAAGTCGAAGACGTTGTTGGCGGTGACCGATATTTTGGTGACCTGGTGCTTGACACTTCAACAACATCCTGCCTGTCAGGTATAGGCATAGAACGGACTTCAGAATCACCAGGATCTCCAGGTGCGTCTTCTTTTGGAAATATAACTTCATTGCGCGAGGACCTGCTCAATGATTCTTCGTCGCCGGGTCACTTCTCGTTGGAGCTTTGGCTGAGCATTGAGAGCATGCCTTCATGCGATAACAAC…	KPRHDVTSPLPTDMIPGMFTILVLHVLHFVCDANAAAIIRYDFSQVECGQSKVEDVVGGDRYFGDLVLDTSTTSCLSGIGIERTSESPGSPGASSFGNITSLREDLLNDSSSPGHFSLELWLSIESMPSCDNNNCAAPILTIGERGVSLDDDCEENMGMMLTYWTETGDFGARFQSAEDECEVLWSGAMQSSSNMGYALHLVLTLDRIEFYGDPYAYFEWFLNGTRVARDVNKFVPPETMMTSWDPDFNLQLLDSSRQVPSSIFSEAPGIKIFYLALHDETLDATAVSSRYATRIHNSTPVVHDAIVGVAEDGENGDHYGEPETYLQEFPVSELQLVPLWFYDSDNDPATPHHDSTNPRVFVNTLPFQGSLVHASGDDIISAPFEVLEDEGAFAVRYRP…	SJ-13_001840	M	AAAGCAACGGTGCTCTCGAGATATACTGCTGGAATAACGAATAGTACGCCCAATGTGTATAGTTCAACAGTATACATAGCTGAGGACGGCGAGGACGGGAACCACTACGGAGAACCCGAAATCTACCTCGACGTATTCCCGGAATCCGAGCTGCAGCAGATTGTCCTGGATGTCTACGACTCGGACACTGACGTAGCATCCCCAAACTTTTATGTCGACAGCAACCCAAGGGTCTTTGTGGACACATTACCTTTCACAGGCTTCCTTGTGAATACCACGGGCGGTAACGTTGTTTCTACACCGTTTGAAGTATTTCACACCAGCGGGGGATTCACTGTCAGATATCGGCCCCTTTTCAACGAGTTTTCTACAGCAAACGACACGGCTTACGCAAATTTT…	KATVLSRYTAGITNSTPNVYSSTVYIAEDGEDGNHYGEPEIYLDVFPESELQQIVLDVYDSDTDVASPNFYVDSNPRVFVDTLPFTGFLVNTTGGNVVSTPFEVFHTSGGFTVRYRPLFNEFSTANDTAYANFSFHAVDILSGVRSYSNASLQIYVYSKNDPPVAGNASYEVNVGTRQNIIPLNGTDIDAHDYIQAAGIVETPAKGSLFQV	MP-13_001840	M	ATGGGTTTGCGATCTTTCGTTTTTTTAGAGATTGCGAAAGAGCGACACAGCAGTTCGAGTTGCGCAATGGCCCTGAAACTAGCGATCTCAGCTTGCCTTACATGGTGCGTGCATCAAGCCAATACGGAGCCAATTATTCAGTATGATTTTACTCAAGCGGGCTGCAGGGACGGTTTAATCAAAGATACTGCGGGTGCCGGGGAATTCTTCGGTGACTTGTTTCTGAACACGTCGTCCTCGTCCTGCATAGGTGGAGTTGGCATTGAAGGAAGTGCCGACTATCCTGGGTGGCCTGGCGCCTACTCTCTAGGGAACACAACAAAATTGCGCCGCACATTGCAAGAACCTGATGTTTATCCAGGATTCTCCCTTGAACTCTGGCTCAATATTGCTGACATT…	MGLRSFVFLEIAKERHSSSSCAMALKLAISACLTWCVHQANTEPIIQYDFTQAGCRDGLIKDTAGAGEFFGDLFLNTSSSSCIGGVGIEGSADYPGWPGAYSLGNTTKLRRTLQEPDVYPGFSLELWLNIADIISCPEDTNLCLTPILTINYPSIIEGTESCIDTVNMQLAYHIPTNYLRISTPSQWGTHCNDFPIYADVLPDETKGYSFHVVFTIEELTLNGRVYSYFSWYINGTRVDYELDQDPATTLGLWEDGHNLQLLDYTRWADSASWFKPTGIRIYRVVMHNETLDRATVLSRYTAGITNSTPSVYSSTVYVAEDGEDGNHYGEPESYLEVFPESELLQIVLDVYDSDTDVASPNLYIDSNPRVFVDTLPLTGFLVNTTGGDVTSTPFEVFPT…	UP-13_001840	M	TGGCCAGCGGCCTATTCTGTAGGAAACGCCACTGCATTGCGCCGCGCTTTGCGAGAACCGGATATTTATCCAGGGTTCTCGCTTGAACTCTGGCTCAATATTCCTGACATCCCATCTTGCCCTGAGGATACCAACACCTGTCTGAGTCCTATTCTTACGATTAACCACCCCGCTACAATAGAGACAACGGAATCTTGTATAGACACGGTGAATATGCAGTTGGCGTACCATATTCCTGCTAATTACATCCGCATCTCCAACCCGAGCATATGGGGCACCCATTGTAATGACTACCCGACGTACACAGATTTTGTGCCAGATGAATCAAAGGGGTATGCCTTCCATTTGGTGCTTACTGAAGAAATAATAAGTTTCCCGGAGCGGGACTACAGCTATTTT…	WPAAYSVGNATALRRALREPDIYPGFSLELWLNIPDIPSCPEDTNTCLSPILTINHPATIETTESCIDTVNMQLAYHIPANYIRISNPSIWGTHCNDYPTYTDFVPDESKGYAFHLVLTEEIISFPERDYSYFRWYVNGTRVDYDLAQDPVVTLGLWEDGHNLQLLDFARWADSSRWFKPAGTKIYFVAMHNETMPKATVLSRYTAGIRNSTPSVYSSTVYIAEDGEAGDHYGEPESYLEVFPESELWQIALDVYDSDTDVASPNLYVTSNPKVFVDTLPITGFLVNSTGGNVVSTPFEVVHVSGEFPVRYRPLFNDFSAVNDTAYANITFYAIDILSGNRSYTNATLDIYVYAKNDPPVAVYASHEVNVGTRQNIIPLNGTDIDADDYIRAAGIVETP…
Ec-sdr_f_000170	Esil-f_000170	F	CACTCGATAGGGAGAAGCGTGGTAACTGCTAGTTTTTTTCTATCGGCAACCTCGGAGACGCCACCGCGGAGAATCGGAGATTATTCTTTCGAATACATCTTCCGTCGCTCCGAATGCCTACAAGGATACGCCAGCGATTCTAACAACGAAGGTTTATTTGGCGATCTGGTGATCAATACTTCGTCGGTAACTTGCAAGGGTTTGGGTATCGAAGCCAAGCCGAACAATCGAGTCGACGAACGCGTTGTATCGGCTTTGGATTCCTCCCGGTTCGTGGCAGAGATGGACAAAGGGAATGGCTTCACGTTCGAGATCTGGGCAACCTTCCAGGATTTTTCTGAGTGCCCAATGTGCCACAGCAGACATGTTGCATCCATCGGAAGCACAAACGAGAACTTG…	HSIGRSVVTASFFLSATSETPPRRIGDYSFEYIFRRSECLQGYASDSNNEGLFGDLVINTSSVTCKGLGIEAKPNNRVDERVVSALDSSRFVAEMDKGNGFTFEIWATFQDFSECPMCHSRHVASIGSTNENLVGDACSTTSDVLFLQTNQSVAMKERTSLPDFTCNTLESWPSAVEWGFPVHAVFTTNATSRGVLTSTSEEDFRTACWYMNGMLAGCDVVIEPASQWHNEFYLQVLNDAVAVRSLDTTYAAPAGVVFLLAMYNRVLDHSEIMNNYDAGLQNSPPVAEDVVATINEDGELGDHYDTPALYLQNPMVSPLNLSIIYLLATDIDQQDGFPGFDVAERVLSAVYIASLPSRGTLYDVDGYLIDHVPHLVPYDGGYPVRYRPEKDDFSGPLDL…	Efas-f_000170	F	GATAGCGAAATTGTGAACAACTACGACGCTGGTCTTGAAAATAGTCCTCCTGTCGCCGAAGATATCGTAGTTACGATCAACGAGGATGGGGAAATAGGTGACCACTATGACACCCCGGCGTTGTATCTGCGAAACCCCATGGTGTCCACGTTAAACTTGTCCATCATATATCTGCTTGCAACAGATATTGATCAGCAAGATGGGTTCCCTGGGTTTGATGCCGCAGAACGAATGCTATCTGATGTTTATATTGCCAGCCTACCATCAAGGGGCACACTCCACGGCGTCGATGGGTACGTCATCGACCACGTCCCCCACTTCGTCCCTTATGATGGCGGGTATCCTGTAAGATACCGCCCTGAAAACGACGAGTTTTCCGGGCCTTTAGATCTGTACACC…	DSEIVNNYDAGLENSPPVAEDIVVTINEDGEIGDHYDTPALYLRNPMVSTLNLSIIYLLATDIDQQDGFPGFDAAERMLSDVYIASLPSRGTLHGVDGYVIDHVPHFVPYDGGYPVRYRPENDEFSGPLDLYTSFSYNAVDGVTGETSVVPGVVEIHVLPKNDPPVPGNFSARIQTGETLIVLSGTDVDSAGGDAIVGFLVVELPRHGVLYQV	SL-f_000170	F	GGGAGGGCGATGTCGGCAACCTCGGGGAGGGTGACAAACTCGTCTTTCGAGTACGTCTTCCGTCGGGCTGAGTGTCTAGCAGGTTACGCTCGCGATAGCAACGACGCAGATTTTTTCGGCGATCTTCAGATCAATACATCATCTGTCACGTGCAGGGGTTTGGGCGTGCAAGCCAAGTCCAACATACGGGACAGCGAAAGAATCACATCGGCTCTAGATGCATCCCGTTTCGTGGACATGATTAACCGCAAGGCAGGGTGGACCTTCGAGGTTTGGGCAACCTTCCAGAATTTTTCCGAGTGCCCTTTTTGTGAAAGCAGGCACATGGCATCAATTGGAAGCATAAACGAGGAGGCGATTGGAGAGCAATGCTCGGCTACTTCTAATCTGATGTTTCTA…	GRAMSATSGRVTNSSFEYVFRRAECLAGYARDSNDADFFGDLQINTSSVTCRGLGVQAKSNIRDSERITSALDASRFVDMINRKAGWTFEVWATFQNFSECPFCESRHMASIGSINEEAIGEQCSATSNLMFLQRNILDQPVAMRVRSTSPDQGCNTMNPVSSSVGWGIPVHAIFTSENLSLSSSETSDPPLRTTCWYINGLYIDCEVVADDALQWEGDDFYLQMMNDAVAVRSLNGTSYAAPAGTFFLIAMYNRPLSENEIIQNFDAGLENSPPVAEDMVVTINEDGEIGDHYETPALYLGNPMVLALNLSIIYLIATDADATDADQQEGFPGFDPGEQLVQPDVYVHTLPSRGTLYNLEGEAIERVPHFVAYHGGFPVRYRPAKDESSGPDDVYTFF…	SJ-f_000170	F	GACCGGGACCTGTGTGCCTGTGACCGCGCTGGTCTTGAGGATAGCCCCCCGGTCGCTGAAGATATCACAGTCACCATCAATGAGGACGGTGAGATAGGGGACCACTACGATACTCCTGGATTTTACGTACGAAACCCAACTGTACCTGTGCTCAGTTTACCAATTATATATCTGCAGGTGACAGATGTCGACCAGCAGGAGGGGTTCCCTGGGTTTAGTGCCGAGCAGGAGCAAGTGTTTCCCGATGTATTTATCAACAGTCTACCTCATGGCGCGCTATTTGACATCGACGGTCAGATGATTACGAAGGTTCCCCACTATGTCACGTTCAGTGGCAGTTATGCGGTAAGATATCGTCCTGAAAAAGACGAGTATTCGGGGCCTAGCGACATATATGCG…	DRDLCACDRAGLEDSPPVAEDITVTINEDGEIGDHYDTPGFYVRNPTVPVLSLPIIYLQVTDVDQQEGFPGFSAEQEQVFPDVFINSLPHGALFDIDGQMITKVPHYVTFSGSYAVRYRPEKDEYSGPSDIYASFTYAAADSVTGEISVAHGVVDIIVLPKNDPPVSNNVTVMVSTGETNIFLNGTDVDSPNGDAIQGALIARLPTHGVLYQV	MP-f_000170	F	AAAGTGTTAGGAGATGATGGTTGGACCTTCGAGATGNNNNNNNNNNNNNCAAATTTTTCTGATTGCCCTTCATGTGAAAGGCGTCACATGGCACACATTGGCACAAACGACACCTTCGAGGGAGACTCATGTTTGCCAAATGCAAATTTCTTTTTTCTGCAACAGAACTCAGATATGTATATGGCCATGGAAGGCAGAAAGGTTGACGCCTCGTGCTACAGCATTCCAGCTGCATCAGCGATTGATTGGGGAGTACCAGTCCATGTTGTATTCACAAGTACGACGTGGGTGTTCGGTAGAAGTAGCACTTCCGACGACAGTTTCTTGACGACTCGCTGGTTTTTCAACGGGGTCCTCGTCCGTGTTGACGACGGCCAGCGGAGTATGGTGAAAGAATGG…	KVLGDDGWTFEMXXXXXNFSDCPSCERRHMAHIGTNDTFEGDSCLPNANFFFLQQNSDMYMAMEGRKVDASCYSIPAASAIDWGVPVHVVFTSTTWVFGRSSTSDDSFLTTRWFFNGVLVRVDDGQRSMVKEWQDGFYLQMLNDAGIDGTIAAKYASPRGTTFLVAMYNWPLNDSQVMQNFNAGLEDSPQQEGFPGVSAEQDQVFPDVFINSLPRGALFDIDGQVITKVPHYVTFNGGYAVRYRPEKDEFSGASDIYAGEISIVAGVVDIXXXXXXXXXMSNNVTATVSMGETNIYLNGTDVDSPYGDAIQGSLIARLPTHGVLYQNTAPRASPAPSRVSVDAGR	UP-f_000170	F	GCTGCTGTTGTTGCTGCTGCTGGAAGCAGCCAAAGGCTGGCTGGTTCCCTTTTTGAGTACACCTTCCGTAAAACGGAATGCTTGTCAGGTTACGCCAAGGATTCAGACACTGGCGCCGCTGTGTTCGGCGATCTCAACATCGACACATCCGCCGTCACGTGCAAGGGCTTGGGCGTGGAAGCTAAGCCTGGCGCAAGTGTGAGTCGTCCAATAATTTCATCTCTAGATTCTTCTCGCTTTGTGGAGGGAATCGGTTCAGGACGTGATGGTTGGAGCTTCGAGACGTGGGTAAAATTCGCAAATTTTTCTGATTGCCCTTCTTGTCAAAGGCGTCACATCGCACACATCGGCGCAAACGATACCTTCGTAGGCGACGCATGTTTGACGAACGCCAATTTA…	AAVVAAAGSSQRLAGSLFEYTFRKTECLSGYAKDSDTGAAVFGDLNIDTSAVTCKGLGVEAKPGASVSRPIISSLDSSRFVEGIGSGRDGWSFETWVKFANFSDCPSCQRRHIAHIGANDTFVGDACLTNANLFFLQQNSEKSVAMEGENVDDSCFNIPAESVIDWGVPVHIVFTSTTCVFGRSSTTDDSFLTTRWFFNGLLVRVDYQKNVAQQWQDGFYLQMLNDARIDGTMTASYASPGGTAFLVAMYNWPLNDSEVMQNFNAGLENSAPVAEDIKVTINEDGEIGGYYDTPGFHQQNHTVSVFSLPIIYLQVTDVDQQEGFPGFDTEEERLLPDVFINSLPRGTLFDVDAQMITKVPHYVTYNDGYPVRYRPEKDESSGPSDIYSSFTYAASDGVT…
Ec-13_001910	Esil-13_001910	M	GAGGGCGTGCCGTGGCCGACTGGGGCAGACGGCTACAAGCTGGACAAAATCATTGGCAAAGGGGCATTTGCGACGGTATGGAAAGCGTTTTGTGGGGCGCGGGAGGTACATGTCGCGGTAAAGGTGATGGACCTCGAGAACGTCACGCACAGCTTCGAGGATATTCGTCAAGAGGTGCCAAAGGAGCGGCCCAACTGCGCCAGTCTTCTGAGCAAGAAGTTCTTCAAGCGAGATCTTCAACCCGGTGGCATCGTCAACGAGCTGTTGGTGCACGTCCCTGTGGTGGGAGAAGGAGACGGGGGACTTGAACGGAAGGAACATGGG	EGVPWPTGADGYKLDKIIGKGAFATVWKAFCGAREVHVAVKVMDLENVTHSFEDIRQEVPKERPNCASLLSKKFFKRDLQPGGIVNELLVHVPVVGEGDGGLERKEHG	Efas-13_001910	M	GAGGGCGTGCCGTGGCCAACCGGGGCAGATGGCTACAAACTGGACAAGATTATTGGGAAAGGAGCGTTCGCGACGGTATGGAAAGCGTTTTGCGAAGCGCGCGAGGTACATGTCGCGGTAAAGGTGATGGACCTCGAGAATGTCACCCACAGCTTCGAAGATATTCGTCAAGAGGTGCCAAAGGAGCGGCCCAACTGCGCAAGTCTTCTGAGCAAGAAGTTCTTCAAGCGAGATTTGCAGCCCGATGCTATCGTCAACGAGCTGTTGGTGCACGTCCCTGTGGTGGGAGAAGGAGACGGGGGACTTGAACGGAGGGAGCAAGGG	EGVPWPTGADGYKLDKIIGKGAFATVWKAFCEAREVHVAVKVMDLENVTHSFEDIRQEVPKERPNCASLLSKKFFKRDLQPDAIVNELLVHVPVVGEGDGGL	SL-13_001910	M	GGACCAGGTGCAAACGAGAGCTGGGCCCAAACAGGCGGCGTGTGTCTCTTCCCGGACGTCGTGTCTGCTACAGAAGGGTGCACTTGCTGCACTTGGGACAAAAGTGTCTGGTTTGTAGGTTGCCGTTCTGCTGTCGTTCAACCCAAGTGGGCGAAGCTAGGCATGTCTGCTTCAGCCAGCTGTGGCCCCGGAGACCCGATGGCGGGCGGAGTGGGCGGCGGAGGAGAGGGCGTCCCATGGCCAACCGGAGCAGACGGCTACAAGCTCGACAAGATAATAGGGAAAGGGGCCTTCGCGACCGTGTGGAAAGCTTTTTGTGGGGCGCGAGAGGTGCATGTGGCTGTAAAGGTAATGGACCTCGAGAACGTCACGCATAGCTTCGAAGACATTCGTCAAGAG…	GPGANESWAQTGGVCLFPDVVSATEGCTCCTWDKSVWFVGCRSAVVQPKWAKLGMSASASCGPGDPMAGGVGGGGEGVPWPTGADGYKLDKIIGKGAFATVWKAFCGAREVHVAVKVMDLENVTHSFEDIRQEVAVMRMCDHPNVLSCYASFVHENELWLVMEFMSKGSCLHVMNVAKKEGKGDGMKEECIAYVLKQTLQGLKYFHDQGQIHRDIKAGNILLGEDGRVKLADFGVAGWLVGYGNRRNVAKTFVGTPCWMAPEVMEQVDGYNQKADIWSVGITALELAKGHAPYARLEPMKVLMQTIEREPPSLKSYPDDRQPGGDVFGRNFKEVVRFCLQKNPKERPNCSSLLSKKFFKRDLQPDAIVNELLVHVPVVGEGDGGLDRSEQGVSAAVSVA…	SJ00948	M	ATGTCCATCTCCGCCGGCGGTGTCGCTGCCGACCAGAAGAAGGTTGGGGCAGGAGATGGGGCGGAAGGGGTGCCGTGGCCCACCGGTGCGGATGGTTACAAGCTGGACAAGATGATCGGGAAAGGAGCGTTCGCAACGGTATGGAAAGCATTTTGTGTAGCGAGGGAGGTGCACGTGGCGGTCAAGGTGATGGACCTCGAGAACGTTACGCATAGCTTCGAGGACATCCGTCAAGAGGTGGCGGTTATGCGCATGTGCGACCACCCGAATGTGCTGAGCTGCTACGCATCGTTCGTTCATGAGAATGAGCTGTGGCTTGTCATGGAGTTCATGAGCAAGGGGTCCTGCTTGCACGTCATGAACGTCGCCAAGAAAGAGGGGAAAGGAGACGGGATGAAG…	MSISAGGVAADQKKVGAGDGAEGVPWPTGADGYKLDKMIGKGAFATVWKAFCVAREVHVAVKVMDLENVTHSFEDIRQEVAVMRMCDHPNVLSCYASFVHENELWLVMEFMSKGSCLHVMNVAKKEGKGDGMKEEWIAYVLKQTLQGLKYFHDQGQIHRDIKAGNILLGEDGRVKLADFGVAGWLVGYGNRRNVAKTFVGTPCWMAPEVLEQVDGYNQKADIWSFGITALELAKGHAPYARLEPMKALMQTLEGEPPSLKSYPDDRQPGGDVFGRNFKEVVRFCLQKNSKERPNCASLLSKKFFKRDLQPDAIVNDLLVHVPVVGEGDVGLVRREAGASRSVLMEEQMTLNAKTGEHPNPAKTFSGREERECYGRPKVAPPDHPAGTTWVWDDGSGVVL…	MP-13_001910	M	GGGAAAGGAGACGGGATGAAGGAAGAGTGGATTGCATACGTCTTGAAGCAGACTCTGCAGGGTCTCAAATACTTTCATGATCAGGGACAGATTCACAGAGACATCAAGGCCGGGAACATTCTCCTGGGAGAAGATGGACGAGTGAAGCTAGCTGATTTTGGCGTGGCGGGATGGCTCGTGGGGTACGGCAATCGCCGGAACGTAGCGAAGACTTTCGTCGGTACGCCATGTTGGATGGCACCGGAAGTGATGGAACAGGTATGA	GKGDGMKEEWIAYVLKQTLQGLKYFHDQGQIHRDIKAGNILLGEDGRVKLADFGVAGWLVGYGNRRNVAKTFVGTPCWMAPEVMEQV	UP-13_001910	Mb	CTGCAGGTGTTGATGCAGACGATTGAGCGAGAACCACGTCGCTGAAATCCTATCCTGAAGGACCGACAACCAGGAGGA	LQVLMQTIEREPRR*NPILKDRQPGG
Ec-sdr_f_000010	Esil-f_000010	F	GAGGGCGTGCCGTGGCCGACTGGGGCAGACGGCTACAAGCTGGACAAAATCATTGGCAAAGGGGCATTTGCGACGGTATGGAAAGCGTTTTGTGGGGCGCGGGAGGTACATGTCGCGGTAAAGGTGATGGACCTCGAGAACGTCACGCACAGCTTCGAGGATATTCGTCAAGAGGTGCCGAAGGAGCGGCCCAACTGCGCCAGTCTTCTGAGCAAGAAGTTCTTCAAGCGAGATCTTCAACCCGGTGGCATTGTCAACGAGCTGTTAGTAAACGTACCTGTGGTGGGCGAGGGGGACGGAGCGCTTGAACAGAGGGAGCCTGGG	EGVPWPTGADGYKLDKIIGKGAFATVWKAFCGAREVHVAVKVMDLENVTHSFEDIRQEVPKERPNCASLLSKKFFKRDLQPGGIVNELLVNVPVVGEGDGALEQREPG	Efas-f_000010	F	GAGGGCGTGCCGTGGCCGACAGGGGCGGACGGCTACAAGCTGGACAAAATCATTGGGAAAGGGGCATTTGCGACGGTATGGAAAGCGTTCTGTGGGGCGCGGGAGGTGCATGTCGCGGTAAAGGTGATGGACCTCGAGAACGTCACGCACAGCTTCGAGGATATTCGTCAAGAGGTGCCAAAGGAGCGGCCCAACTGCGCAAGTCTTCTGAGCAAGAAGTTCTTCAAGCGAGATCTTCAACCCAGTGGCATTGTCAACGAGCTGTTAGTGAACGTACCTGTGGTGGGCGAGGGGGACGGAGCGCTTGAACAGAGGGAGCCCGGG	EGVPWPTGADGYKLDKIIGKGAFATVWKAFCGAREVHVAVKVMDLENVTHSFEDIRQEVPKERPNCASLLSKKFFKRDLQPSGIVNELLVNVPVVGEGDGAL	SL-f_000010	F	CGTGGGCTTAACAGCGCATTTGAGCGCTGCTCAGCGATGTCCGCTGCAGGAGTGAGCTTCACGGAAAGCATGGGTGGCGGGGCTGGCGGCGGAGAAGGAGTGCCATGGCCCACCGGAGCGGACGGCTACAAGCTTGACAAGATAATTGGAAAAGGGGCATTTGCGACGGTGTGGAAAGCGTTTTGCGCAGCTCGGGAAGTACACGTGGCGGTGAAGGTGATGGATCTCGAGAACGTCACGCACAGCTTCGAGGACATTCGTCAAGAGGTGGCGGTCATGCGCATGTGTGACCATCCAAATGTGCTGAGCTGTTACGCGTCTTTCGTGCACGAAAATGAGCTATGGCTGGTGATGGAGTTCATGAGCAAAGGGTCCTGCTTGCACGTGATGAACGTCGCC…	RGLNSAFERCSAMSAAGVSFTESMGGGAGGGEGVPWPTGADGYKLDKIIGKGAFATVWKAFCAAREVHVAVKVMDLENVTHSFEDIRQEVAVMRMCDHPNVLSCYASFVHENELWLVMEFMSKGSCLHVMNVAKKEGKGDGMKEEWIAYILKQTLQGLKYFHDQGQIHRDIKAGNILLGEDGRVKLADFGVAGWLVGYGNRRNVAKTFVGTPCWMAPEVMEQVDGYNQKADIWSIGITALELAKGHAPYARLEPMKVLMQTIEREPPSLKSYPDDRQPGGDVFGRNFKEVVRFCLQKNPKERPNCASLLSKKFFKRDLQADGIVKELLVNVPVVGEGDGSLERDSGIPAAVLMEEQMTLDMKIGVQPKPTASTSAARDEDGHGRRKVAPPDHPAGTTWV…	SJ-f_000010	F	GAGGGGGTGCCATGGCCCACGGGAGCGGATGGTTACAAGCTTGACAAGATTATCGGGAAGGGGGCTTTCGCGACAGTATGGAAAGCGTATTGTGCGACGAGAGGAGTGCATGTTGCGGTGAAGGTGATGGATCTGGAGAACGTGACTCATAGCTTCGAGGACATCCGGCAAGAGGTTCCGAAGGAGCGGCCAAACTGCGCCAGCCTTCTTAGCAAGAAGTTCTTCAAGCGAGATCTGCAACCAGATGGCATTGTCAAGGAACTTCTAGTGCACGTGCCCGTGGTGGGCGAGGGGGAAGGAGGAGCCGAACGGAGGGATCTCGGA	EGVPWPTGADGYKLDKIIGKGAFATVWKAYCATRGVHVAVKVMDLENVTHSFEDIRQEVPKERPNCASLLSKKFFKRDLQPDGIVKELLVHVPVVGEGEGGAERRDLG	MP-f_000010	F	CTTCGATTGGTATACTTCATAAACCAGAGGGGGGAAAGAAAGGGAGGGGGTACGCCGGAACTAACTACGTTGACGCCGCTATACGGGATAAGGATTGGATCCAAGGCCTACGAGGGCAGCAACAACCCTGTTTCAAGGACCAAGCCTGTTGATCATATCTGCAAGGGAAGGCGAGTGAAGTGTGGCATACTCATGTCCGCTCTAGGCGGTAGTGGCTCTTCGGACTATAAAGGAGCCGGTGGTGGGGGAGAGGGGGTGCCATGGCCCACGGGAGCGGATGGCTACAAGCTTGATAAGATGATCGGGAAGGGGGCTTTCGCGACAGTATGGAAAGCGTACTGTGCGACGAGAGGGGTGCATGTGGCGGTGAAGGTGATGGATCTCGAGAACGTGACTCAT…	LRLVYFINQRGERKGGGTPELTTLTPLYGIRIGSKAYEGSNNPVSRTKPVDHICKGRRVKCGILMSALGGSGSSDYKGAGGGGEGVPWPTGADGYKLDKMIGKGAFATVWKAYCATRGVHVAVKVMDLENVTHSFEDIRQEVAVMRMCDHPNVLSCYASFVHENELWLVMEFMSKGSCLHVMNVARKEGKGNGMKEEWIAYVLKQTLQGLKYFHDQGQIHRDIKAGNILLGEDGRVKLADFGVAGWLVGYGNRRNVAKTFVGTPCWMAPEVMEQVDGYNQKADIWSVGITALELAKGHAPYARLEPMKVLMQTIEREPPSLKSYPDDRQPGGEVFGRNFKEVVRFCLQKNPKERPNCASLLSKKFFKRDLQPDGIIKELLVHVPVVGEGEGAERRELGS…	UP-f_000010	Fb	CCACGGACGGTGCTTCTGTACGTGCGCGCTTCTGTATGTGCAACATCAACCCCGATTAACAAATCAAGGCACCTGATCATACCTGCGAGAGACGGCGAGTGTGACATACTCATGTCCGCACTAGGAGGTAGTGGTTCTTCGGACGTTAAGGGAGCCGGCGGTGGGGGGGAGGGGGTACCATGGCCCACGGGAGCGGATGGCTACAAGCTGGACAAGATGATCGGGAAGGGGGCGTTCGCGACGGTATGGAAAGCGTTTTGTGCGACGAGAGGAGTGCACGTAGCGGTGAAGGTGATGGATCTCGAGAATGTGACTCATAGCTTCGAGGACATCCGTCAAGAGGTGGCAGTGATGCGCATGTGCGACCACCCGAATGTGCTTAGCTGCTATGCGTCGTTC…	PRTVLLYVRASVCATSTPINKSRHLIIPARDGECDILMSALGGSGSSDVKGAGGGGEGVPWPTGADGYKLDKMIGKGAFATVWKAFCATRGVHVAVKVMDLENVTHSFEDIRQEVAVMRMCDHPNVLSCYASFVHENELWLVMEFMSKGSCLHVMNVAKKEGKGNGMKEEWIAYVLKQTLQGLKYFHDQGQIHRDIKAGNILLGEDGRVKLADFGVAGWLVGYGNRRNVAKTFVGTPCWMAPEVMEQVDGYNQKADIWSVGITALELAKGHAPYARLEPMKVLMQTIEREPPSLKSYPDDRQPGGEVFGRNFKEVVRFCLQKNPKERPNCASLLSKKFLKRDLQPDGIVKELLVHVPVVGEGEGGVERREFGLPAAVLLEEQMTLDVKTGAKSRAAKAT…
Ec-13_001950	Esil-13_001950	M	ATGGCGCGAAAGGGAAGGAAATGTGTCCCCAGCTACATTGGCGTGGCTTATGCATCGCTTGGAGCACTCAGCTTGTGCGGAACGACAACATCCTTCGTTTTGCGACAAAGCCTAAGGGTGACACCCACGGCAGGGCGGTACCTGCATGCTTGCCCGCCTGTGGGACGACAGCGCCGAGAAGGCGAACCAAATGAGGCGACAAGGAAGGGCTCGGCAACCATGGCCACCTCCGTAAAGCAGGTTTCTGAGCCGATGACTCTAACTGAAAAGATCATCGCGAAAGCGTGCGATCGGCAAAGCGTGGCACCGAACGACAACGTGTGGGTCAAAACGGACGTGTTGATGACACACGACGTCTGCGGCCCGGGCACCATCGGGAACTTCTACAAAGAGTTTGGT…	MARKGRKCVPSYIGVAYASLGALSLCGTTTSFVLRQSLRVTPTAGRYLHACPPVGRQRREGEPNEATRKGSATMATSVKQVSEPMTLTEKIIAKACDRQSVAPNDNVWVKTDVLMTHDVCGPGTIGNFYKEFGPKAKVPDKVLFGTDSHTCNAGAFGQFATGIGNTDASFVMGTGKLLIKSPASMQFALEGEIPDHLLAKXPKAKYFSKKRYDMSNLEPVVARPHSPDNKALAKDCRDTKIDRVYIGSCTGGKTEDFAAAARILQNQKEIGGRTLGSIFREAGCLEPASPSCAACLGGPADTYARMNEPFQCVSTTNRNFPGRMGHKDAGIYLASPYTAAASAITGYVTDPREVFEFDQDKRWAIEDILTDSARVEGQEMHLA	Efas-13_001950	M	ATGACGATGACCGAGAAAATCCTCGCCGCACACGCCGGCAAGAGCGAAGTTGCCCCCGGCGACAACGCATGGGTCAACGTTGACGTATTGATGACGCACGACGTCTGCGGCCCCGGGACCATCGGCATCTTCAAGAAAGAGTTTGGCGAAGATGCCAAGGTCTGGGACAACACGCGCATCCCCATCATCCCTGACCACTACATCTTCACCGCCGATGGCAAGTGCCACCGCAACGTCCAGATCCTCCGCGATTTTGTCAAAGAACAGAACATCAAGTATTACTACGACCCCGACTTCCTCGACACCGATGAGGCCTCGACCAGTTACAAAGGCGTCTGCCACAAGGCCCTGCCCGAAGAGGGCCACTGCCGCCCCGGCGAGATCCTCCTGGGTACCGAC…	MTMTEKILAAHAGKSEVAPGDNAWVNVDVLMTHDVCGPGTIGIFKKEFGEDAKVWDNTRIPIIPDHYIFTADGKCHRNVQILRDFVKEQNIKYYYDPDFLDTDEASTSYKGVCHKALPEEGHCRPGEILLGTDSHTCTAGAFGQFASGVGNTDAAFTMGTGKTWLKVPPTMRFNFHGEIPPFLTAKDLILAVIGDIGFAGATYKSMYFAGDGIGSLSLEDRMTLTNMAIEAGGKNGICDVDEKTLAYVRARNRPDWTVYSEDDGATYDYEQTWDLGNFEPLVAAPHSPDNTKTAHELMKAGTKLDRAYIGSCTGGKITDMLFAANILFGQEVRIPTFVVPGSTEVHADMLNLNLYGEPLDRQRIDPSLTQLGGTKPQAEGASAPGPDAQDPRATTSIYQ…	SL-13_001950	M	CAGCTCATGGCTCGAACGGAGAAGAGGGCCGTCCTCAGCCTCTGGGCAGTGGTTCGAGCTTCTATGGGGGCACTTTGCTTGTTCGATACGGCGACGTCCTTCGTTTGGGGCCAACGGCTAGGGGTGACAAGTCGCACACGTGGGTGCATGCGCGCATTTGTGAGCTCGCGAGGAAGTACAGTTCAGCTTCCTCCCCTTCGAGAGCGTCAAGGTCGCGTAGTAAAGGCAGCTTCCCGTCCACAGACTCCATCGATGGTCACTTCTGTCAAGGTTTCCGAGCCGATGACCGTTACGGAGAAGATCATCGCAAAGGCTTGCGGCCGATCGAGCGTCGCGCCCAACGACAACGTGTGGGTTCGAACGGACGTTTTGATGACACACGACGTCTGCGGCCCAGGC…	QLMARTEKRAVLSLWAVVRASMGALCLFDTATSFVWGQRLGVTSRTRGCMRAFVSSRGSTVQLPPLRERQGRVVKAASRPQTPSMVTSVKVSEPMTVTEKIIAKACGRSSVAPNDNVWVRTDVLMTHDVCGPGTIGNFYKEFGPKAKVWDPEGVVIIPDHYIFTADPRANRNVDILRDFVNQQDIKYFYDITDRGNFKVNPDYKGVCHVALAQEGHTRPGEVLFGTDSHTCNAGAFGQFATGIGNTDASFVMGTGKLLIKSPASMQFALEGEMPDHLLAKDIILQIIGDIGVAGATYRSMEFAGSALGQLSMEERQTLCNMAIEAGGKNGVIPADHVTTAYVDARNAGNKPYEIFNADQNAKYFSKQRYDVGNLEPVVAKPHSPDNKALARDCRDTKID…	SJ10505	M	GCCAAGTACTTCTCGAAGCAAACGTACGACCTGAGTAACCTTGAGCCGGTTGTCGCCAAGCCTCATTCTCCGGACAACAAGGCACTGGCGAAGGACTGCCGCGACACGAGGATCGACCGCGTATACATCGGTTCCTGCACGGGAGGGAAGACGGAAGACTTCGCGGCTGCCGCCCGCATCCTCCAGAATAAGAAGGCATATTCCACAGCGGTGCGAGTGCCGACGTTCTTGGTTCCCGCCACCCAAAAGGTTTACAACGACATCCAGACCTTGAAGATCGAAGGGCGCACGCTGGCTTCAATTTTTCGCGAGGCTGGCTGCTTAGAACCTGCATCTCCGTCGTGCGCTGCGTGCCTTGGAGGGCCGGCCGATACGTACGCACGCATGAACGAACCGTTT…	AKYFSKQTYDLSNLEPVVAKPHSPDNKALAKDCRDTRIDRVYIGSCTGGKTEDFAAAARILQNKKAYSTAVRVPTFLVPATQKVYNDIQTLKIEGRTLASIFREAGCLEPASPSCAACLGGPADTYARMNEPFQCVSTTNRNFPGRMGHKDAGIYLASPYTAAASAVTGFVTDPREVFDFDKGKRWATEDLLTEGAKDVVAGQKSC	MP-13_001950	M	TGCCGGGGTGGACTAGATTCCGTTCAATCCTACCTACACAGAGAAAACCTTCGTCTGCAACGAGGACGGTATTACACGCACGTTGAAAGGGTGCTACTTGCTTGTCGACAATGGCTACAGCAAGTTGGTTTTTCTCATGGAGCCCAGCAAATACCCGATACTCGAAGGCGACATTACCTTCTCCAAGACGCTAGAGAGCGTGCCCATGGACATGGAGTGTTTTTCGGCATCCTAAAGGGCCGCTTTAGAATCCTGAAGCTCGTCATGACCTACCACAAGCAGGAGCGCATCGACAACGTGTTCTTCACGTGCTTTATTCTGCACAACATGCTCCACACCTTTGACAACATGGGCCAGATGGAGGACAACCACACCTGGGTTGGTAGTGCCGGACCCCAT…	CRGGLDSVQSYLHRENLRLQRGRYYTHVERVLLACRQWLQQVGFSHGAQQIPDTRRRHYLLQDARERAHGHGVFFGILKGRFRILKLVMTYHKQERIDNVFFTCFILHNMLHTFDNMGQMEDNHTWVGSAGPHDSWEHDPTTDRSSVGAKDHQLKRKVEAGHALRKKQLSTSFMYRKKSRRTLDGVPENPGVCDGVVTPVWDQDGVVIIPDHYIFTADPRANRNIDILRDFVNQQSIKYFYDITDRGNFKVNPNYKGVCHVALAQEGHTRPGEVLFGTDSHTCNAGAFGQFATGIGNTDASFVMGTGKLLIKSPSSMQFSLDGEIPDHLLAKDIILQIIGDIGVAGATYRSMEFSGSALGQLSMEERQTLCNMAIEAGGKNGVIPADDITTDYVNARNA…	UP-13_001950	A	GGGACGGGATCTCGAGCGGGCCTGCTAGTGTCTGGTATATACGTGGAAACATCCAGTTGCGCCCACTGGACAACACCTCAGCTGCCGGCGGAGAAGAGAATGACGGCCACACAAGAGGCACGGAGACGCCCATTCTTGCGCGGTTCTGTTGCGTGCGCCTACATAGCAGCGTTTGGGTGTGAGGGCTTGGCAACTGCGTCAACTGTTCAGCATGGATCAAGAGTCGTGCCGCTGCCGGACCAATCCATCTCTGCTTTCGTTGGTTCTTTGTCGAATTTGTACCCTGTTGGGTGGCGGCAGCGACGTGGACACAGTAAGAGGGGTGCTCCCGGGTGTTCTCCGAGCATGGTGGCGTCTGTCAAGGTTGACACGCCGATGACCCTGACGGAGAAGATCATC…	GTGSRAGLLVSGIYVETSSCAHWTTPQLPAEKRMTATQEARRRPFLRGSVACAYIAAFGCEGLATASTVQHGSRVVPLPDQSISAFVGSLSNLYPVGWRQRRGHSKRGAPGCSPSMVASVKVDTPMTLTEKIIAKACDRPSVAPNDNVWVKTDVLMTHDVCGPGTIGNFYKEFGLQAKVWDQDGVVIIPDHYIFTADPRANRNVDILRDFVNQQGIKYFYDITDRGNFKVNADYKGVCHVALAQEGHTRPGEVLFGTDSHTCNAGAFGQFATGIGNTDASFVMGTGKLLIKSPASMLFSLDGDMPDHLLAKDIILQIIGDIGVAGATYRSMEFSGSALGQLSMEERQTLCNMAIEAGGKNGVIPADAITTAYVDARNAGSKPYEVFRADSNAKYFSKHS…
Ec-sdr_f_000030	Esil-f_000030	F	ATGACCCTGACGGAAAAGATTATCGCTAAGGCATGCGATCGCCCCAGTGTCTCTCCGAACGACAACGTTTGGGTGAAAACGGACGTCCTCATGACTCATGATGTCTGCGGTCCCGGTACGATTGGAAACTTCTACAAGGAGTTCGGGCCCAAGGCCAAGGTGTGGGACTCGGAAGGTGTCGTGATTATTCCTGACCACTACATCTTCACGGCGGACCCTCGGGCAAACCGTAACGTCGATATTTTGCGGGATTTTGTCAACCAGCAGGACATCAAGTACTTTTACGACATCACCGACCGTGGCAACTTCAAGGTGAATCCGGACTACAAGGGCGTCTGCCACGTCGCGCTCGCGCAGGAGGGTCACACGAGACCTGGAGAGGTGTTGTTCGGGACAGAC…	MTLTEKIIAKACDRPSVSPNDNVWVKTDVLMTHDVCGPGTIGNFYKEFGPKAKVWDSEGVVIIPDHYIFTADPRANRNVDILRDFVNQQDIKYFYDITDRGNFKVNPDYKGVCHVALAQEGHTRPGEVLFGTDSHTCNAGAFGQFATGIGNTDASFVMGTGKLLIKSPASMQFSLEGEIPDHLLAKDIILQIIGDIGVAGATYRSMEFAGSALGQLSMEERQTLCNMAIEAGGKNGVIPADDVTKAYVDSRNAGNKPYEVFNADPNAKYFSKQSYDLGLLEPVVARPHSPDNKALAKDCRDTKIDRVYIGSCTGGKTEDFAAAARILQNKKVRVPTFLVPATQKVYNDIQTLKIEGRTLASIFREAGCLEPASPSCAACLGGPADTYARMNEPFQCVST…	Efas-f_000030	F	ATGACCCTGACGGAGAAGATTATCGCGAAGGCATGCGACCGCCCCAGTGTCTCTCCGAACGACAATGTTTGGGTGAAAACGGACGTGCTCATGACTCACGATGTCTGCGGTCCCGGTACGATTGGAAACTTCTACAAGGAGTTCGGGCCCAAGGCTAAGGTGTGGGACTCGGAAGGTGTCGTGATTATTCCTGACCACTACATCTTCACGGCGGACCCTCGGGCAAACCGTAACGTCGATATATTGCGGGATTTTGTCAACCAGCAGGACATCAAGTACTTTTACGACATCACCGACCGTGGCAACTTCAAGGTAAATCCAGACTACAAGGGCGTCTGCCACGTCGCACTCGCGCAGGAGGGTCACACAAGACCTGGAGAGGTGTTGTTCGGGACAGAC…	MTLTEKIIAKACDRPSVSPNDNVWVKTDVLMTHDVCGPGTIGNFYKEFGPKAKVWDSEGVVIIPDHYIFTADPRANRNVDILRDFVNQQDIKYFYDITDRGNFKVNPDYKGVCHVALAQEGHTRPGEVLFGTDSHTCNAGAFGQFATGIGNTDASFVMGTGKLLIKSPASMQFSLEGEIPDHLLAKNDVARRCNMAIEAGGKNGVIPADDVTKAYVDSRNAGNKPYEIFNADPNAKYFSKQSYNVGLLEPVVARPHSPDNKALAKDCRDTKIDRVYIGSCTGGKTEDFAAAARILQNKKIDGRTLASIFREAGCLEPASPSCAACLGGPADTYARMNEPFQCVSTTNRNFPGRMGHKVR	SL-f_000030	F	GTTACAACGAAGAGGTCTCTCCCGAGCAACGGAATCTTTCGCGCAGGAATAGCTGTCGCTCTGTTGTCGCTGACACTTCTCTCGACGTTTCCGACATCTTTCGTCTGGCGACCTGCAGACATGAGCGCAAAACTTGTGTATGCCTTATTGGGGGCGCTCACGATCACGCGCGGTGCTACTGCGTTTGTAATGGGAGGGAGAGCAGATCTGAGGTCATCTAGGCCTTCACGGGAGTGTCTGTACGCGGGGCGGCATCGGGGAGAACGATACATGCCTATGATGGTGGCATCAGTGAAGGTTTCCGCGCCGATGACACTGACGGAGAAAATCATTGCGAAGGCATGCGATCGCCCCAGTGTTTCTCCGAATGACAATGTGTGGGTCAATACGGACGTACTC…	VTTKRSLPSNGIFRAGIAVALLSLTLLSTFPTSFVWRPADMSAKLVYALLGALTITRGATAFVMGGRADLRSSRPSRECLYAGRHRGERYMPMMVASVKVSAPMTLTEKIIAKACDRPSVSPNDNVWVNTDVLMTHDVCGPGTIGNFYKEFGPTAKVWDPEGVVIIPDHYIFTADPRANRNVDILRDFVTQQDIKYFYDITDRGNFKVNPDYKGVCHVALAQEGHTRPGEVLFGTDSHTCNAGAFGQFATGIGNTDASFVMGTGKLLIKSPASMQFSLEGEMPDHLLAKDIILQIIGDIGVAGATYRSMEFAGSALGQLSMEERQTLCNMAIEAGGKNGVIPADEITTSYVDARNAGDKPYEIFNADPNAKYYSKQSYDLGSLEPVVARPHSPDNKALA…	SJ-f_000030	F	GTGTTGTTCGGAACGGACTCGCACACTTGCAACGCGGGTGCTTTCGGTCAGTTTGCAACGGGGATTGGAAACACGGATGCTTCTTTCGTCATGGGCACGGGCAAGCTTTTGATCAAAAGCCCGGCGTCCATGCAGTTTGCGCTCGAGGGGGAAATGCCAGACCACCTGTTGGCGAAGGCAAGATACTACTCTAAGCAGAGCTACAACCTCGGCAACCTCGAGCCGGTTGTGGCTAAGCCCCACTCGCCAGACAACAAGGCCCTGGCCAAGGACTGCCGTGATACCAAGATTGACCGCGTCTATATCGGCTCTTGCACTGGAGGAAAGACGGAGGATTTTGCGGCTGCGGCCCGTATCTTGCAAAACGAGAAGGTTCGGGTGCCGACGTTCTTGGTTCCT…	VLFGTDSHTCNAGAFGQFATGIGNTDASFVMGTGKLLIKSPASMQFALEGEMPDHLLAKARYYSKQSYNLGNLEPVVAKPHSPDNKALAKDCRDTKIDRVYIGSCTGGKTEDFAAAARILQNEKVRVPTFLVPATQKVYNDLQTLKIGGRTLASIFREAGCLEPASPSCAACLGGPADTYARMNEPFQCVSTTNRNFPGRMGHKVSARLVYMVS	MP-f_000030	F	ATGGGCAGGCGGTTGTTGTCGGCGACGAGTCGGCGGACGTCGGTGTCTTCGATCTGCAACAGCGCGACCGCCATCTCCGGGCGGCGCTGCAGGCCGGTCGTCACTTCGTCGAGCCGACTGATGGAGATTTCGCCGTCGGCCGGGAGGTCGGACGGGACGAGGAGCTGTTCGCCGACGACGGGCAGGTCCGCGTCGTTGATGAGACGCTTGAGCTGGTCGGAGAGGTCGCGGACGCTGCGCTGGGCGCGGAGGACATCGGCCCGCCGTTGGCCGACGCGGGCGTTGACCTCGTTGAGGTCGGCCTGCAGGAGGTCAAACCCGACGCGGGGCTCGAGCTTGTCGCGCATCGCGGTCGTGCGTTCGAGCAGACTCTGCTGGATCAGGAGCACCTGCTGCGCC…	MGRRLLSATSRRTSVSSICNSATAISGRRCRPVVTSSSRLMEISPSAGRSDGTRSCSPTTGRSASLMRRLSWSERSRTLRWARRTSARRWPTRALTSLRSACRRSNPTRGSSLSRIAVVRSSRLCWIRSTCCACASCQYVCSTATARPPMPRKMTMTEKILAAHAGKDSVTPGDNVWVDVDILLTHDVCGPGTLGIFEEEFGKDAKVWDNERLVIIPDHYIFTADEKCHRNVQILRDFVVKQKIKYYYDPDFLNTEFGSGFPSAYRDPKNTTYKGVCHKALPEEGHCRPGEILLGTDSHTCTAGAFGQFATGVGNTDAAFTLGTGKTWLKVPPTMRFDFHGDIPPYLTAKDLILAVIGDIGFAGATYKSMYFAGSGIGSLSLEDRMTLTNMAIEAGGKN…
Ec-13_001990	Esil-13_001990	M	TGTGGTAGTTTTGGCGACATCTACCTAGGTGTTGGTCAAAATGGCGAACAGGTGGCGGTCAAGTTTGAGAAGCATAGCACAAGATGCCCGCAACTGCGACACGAGTACAAGGTCTACCGCGAGCTACAGAACTGCACTGGGTTCGGGAGGGTGTACTACTACGGAACATACAACAGCTATAACGCGATGGTGATGGACCTGCTCGGCCCTTCTTTGGAAGACCTCTTCACCAAATGCGGTCGTAGGTTTTCGCTCAGAACCGTGCTCCAGGTTGCCGACCAGCTACTGGACAGGATGGAGACGATGCACTCTAGGCATCTTATTCACCGAGATGTGAAACCGGCGAACTTCGTGCTCGGGCCTGGTCGCGGATGCCAGACTATATTTTGCATCGATTTC…	CGSFGDIYLGVGQNGEQVAVKFEKHSTRCPQLRHEYKVYRELQNCTGFGRVYYYGTYNSYNAMVMDLLGPSLEDLFTKCGRRFSLRTVLQVADQLLDRMETMHSRHLIHRDVKPANFVLGPGRGCQTIFCIDFGLSTRYRHPRTLQHIPYRDGRSLTGTPRYSSXVYFLKGSLPWQGLKARNAKRKYKIIMERKQAISIQQLCQGLLRELYKVQGHSPSGTPEWDWSKFEGGSGRGGVENVSGEAIATSDKPGETQVPGVWQAVPAEVKATTKANMIPVVRSTNGENHVGNPGVGREHDRPGAQPVAKRSTTEIKNAIRTARVTGCQLQPQNGENDNQATEFTDNSRGRCAGGRNATRRSRGHSPVHGTAGWSMWNLRPKTSGTFWGRGVQETTPTEAG…	Efas-13_001990	M	GGCTGCGGTAGCTTTGGCGACATCTACCTAGGTGTTGGCCAAAACGGCGAACAGGTGGCGGTCAAGTTTGAGAAGCATAGCACAAGATGTCCGCAATTGCGACACGAGTACAAGGTCTACCGCGAGCTACAGAACTGCGCTGGGTTTGGGAGGGTG	GCGSFGDIYLGVGQNGEQVAVKFEKHSTRCPQLRHEYKVYRELQNCAGFGRV	SL-13_001990	M	GATATGAGTGCCAGCACGGGGGCGAGCAGCCAAGGGCGCAAATTCCACGCACTCATGAACGAGCAGTACAGAATCACCAAGCGGCTCGGGGGTGGAAGTTTCGGCGACATCTACTTAGGTGTAGGTCAAAACGGGGAACAGGTGGCCGTCAAGTTCGAAAAACACAGCACAAGATGCCCCCAACTTCGACACGAGTACAAGGTCTACCGAGAGCTCCAGAATTGCGTCGGTTTCGGCATGGTCTATTACTATGGCTCATACAACAGCTACAATGCGATGGTGATGGACCTCCTCGGGCCATCTTTGGAAGATCTGTTCACGAAGTGTGGGCGCCGATTTTCGCTCAGGACCGTGCTGCAGATTGCCGATCAGCTGCTGGAGAGAATGGAGACGATGCAC…	DMSASTGASSQGRKFHALMNEQYRITKRLGGGSFGDIYLGVGQNGEQVAVKFEKHSTRCPQLRHEYKVYRELQNCVGFGMVYYYGSYNSYNAMVMDLLGPSLEDLFTKCGRRFSLRTVLQIADQLLERMETMHSRHLIHRDVKPANFVLGPGRGCQTIFCIDFGLSTRYRHPRTLQHIPFRDGRSLTGTPRYASINNHLGLEQSRRDDLESIGFVLVYFLKGSLPWQGLKARNAKRKYKIIMERKQAISIQQLCQGLPQQFAEYLAYCRSLKFEAKPNVPYLQGLLRELDKIRGHLPTNTTEWDWSKLEVQSGSNEVQHTVGEKLSEAVKLGETSQKPNDCDTIPAEAEVTAITHKKLLEEGRQERNVDAQGLGSEPAGLRTQPTAKWALDGDNKKGMA…	SJ09422	A	ATGAATGCCAGCACGGCAACACGAAGCCAGAGCCACTCCTCGGTGCTCGTCAACGAGCAGTACCGGATCGCAAAGCGGCTCGGGGGAGGAAGTTTCGGCGACATCTTCCTGGGCGTTGGTCAAAACGGTGAACAGGTGGCCGTGAAATTTGAGAAGCACAGCACGAGATGCCCGCAACTACGGCACGAGTACAAGGTTTACCGGGAACTGCAGAACTGCCCCGGCTTCGGACGCGTCTACTTCTACGGGACACACAACAACTTCAACGCCATGGTGATGGACCTCTTCGGGCCCTCGCTGGAAGACCTGTTCACCAAGTGCGGGCGACGATTCTCGCTGAAGACCGTCCTTCAGGTTGCTGACCAGCTCCTTGAACGGATGGAGACGATGCACTCTAGG…	MNASTATRSQSHSSVLVNEQYRIAKRLGGGSFGDIFLGVGQNGEQVAVKFEKHSTRCPQLRHEYKVYRELQNCPGFGRVYFYGTHNNFNAMVMDLFGPSLEDLFTKCGRRFSLKTVLQVADQLLERMETMHSRHLIHRDVKPANFVLGLGTGCQTIYCIDFGLSTRYRHPRTLQHIPYRRGRSLTGTPRYASVNNHLGLEQSRRDDLESIGFVLVYFLKGSLPWQGLTARNAKRKYKLIMERKQATSIQQLCQNLPQQFAEYLAYCRSLKFEAKPNVPYLQGLLRDLYKVQGYASSATTEWDWGKFESPSSVLRVGDTTTAGDTRPSTGCAIVPSTAHDRIPTAGDRADSSHGGKPSIGNSRHDNKAGTALCLKWDARKRTSSATNNRNDVETPPCTRD…	MP-13_001990	A	ATGGATGCCAGCACGGCAACAAGAAGCCAGGGCCATTCCTCGGTGCTCGTCAATGGGCAGTACCGGATTGCAAAGCGACTCGGAGGAGGAAGTTTCGGCGACATCTTCCTAGGTGTTGGTCAAAACGGTGAACAGGTGGCTGTAAAATTCGAAAAGCACAGCACGAGATGCCCGCAACTGCGGCACGAGTACAAGGTTTATCGTGAACTACAGAACTGCCCTGGCTTCGGACGGGTGTACTTCTACGGGACACACAACAACTTCAATGCAATGGTGATGGACCTTTTTGGGCCTTCGTTAGAAGACCTGTTCACCAAATGCGGGCGAAGATTTTCGCTGAAGACTGTCTTGCGAGTCGCCGACCAACTTCTCGAACGGATGGACACAATGCACTCTCGG…	MDASTATRSQGHSSVLVNGQYRIAKRLGGGSFGDIFLGVGQNGEQVAVKFEKHSTRCPQLRHEYKVYRELQNCPGFGRVYFYGTHNNFNAMVMDLFGPSLEDLFTKCGRRFSLKTVLRVADQLLERMDTMHSRHLIHRDVKPANFVVGPGSGCQTIFCIDFGLSTRYRHPRTLQHIPYRRGRSLTGTPRYASVNNHLGVEQSRRDDLESIGFVLVYFLKGSLPWQGLKARNAKQKYKIIMERKQAISIQQLCQGLPQQFAEYLAYCRSLKFEAKPNVPYLQGLLRDLFKVQGHTSSATTEWDWEKFESPYVSGVGDNTAGETRPTTGCAIVPTVHDKVPTAGDNNDISHGGEPSIGISRHDKAGTATALCSKWGARKHTSSDTSNNRNDLETPPCSRDY…	UP-13_001990	M	CCCAAATGGCTCCGGGCACAACCAGCCTCAACGGATCTGCGTCTCAACGAGGAAGGAGGAATGAACGCCAGTACGGCAACAAGAATCCAGGATCACACGTCGGTACTCGTCAATGACCAGTACCGAATTGCAAAACGACTCGGTGGAGGAAGTTTCGGCGACATCTTCCTAGGTGTTGGGCAAAACGGTGAGCAGGTGGCTGTCAAATTTGAGAAGCACAGCGCAAGATGCCCGCAGCTTCGGCACGAGTACAAGGTTTATCGTGAACTACAGAACTGCCCTGGCTTCGGACGGGTGTACTACTACGGGACACACAACAACTTCAATGCAATGGTGATGGACCTTTTTGGACCTTCGTTAGAAGACCTGTTCACCAAATGTGGAAGACGCTTTTCGCTC…	PKWLRAQPASTDLRLNEEGGMNASTATRIQDHTSVLVNDQYRIAKRLGGGSFGDIFLGVGQNGEQVAVKFEKHSARCPQLRHEYKVYRELQNCPGFGRVYYYGTHNNFNAMVMDLFGPSLEDLFTKCGRRFSLKTVLQIADQLLERMETMHSRHLIHRDVKPANFVLGPGSGCQTIFCIDFGLSTRFRHPRTLQHIPYRRGRSLTGTPRYASINNHLGLEQSRRDDLESIGFVLVYFLKGSLPWQGLKARNAKRKYKIIMERKQSISIQHLCQGLPQQFAEYLAYCRSLTFEAKPNVLYLQGLLRELYKVQGHSSSATVEWDWGKFESPSVSGGADHTAGDVLPATGCGVIPAGQEKVPIAGNKIDYSHGGEPSLGIGRHDKAGPALYAKGDSRKCTSI…
Ec-sdr_f_000040	Esil-f_000040	F	ATGAGTGGCAGCACTGCGACGGCGGGCAGCATCAACAACACTTTTGCGCCACTTATCAACGAGCAGTATCGGATCACCAAGCGCCTGGGAGGAGGGAGCTTTGGTGACATCTACCTTGGGCTAGCCCAGAACGGAGAGCGAGTGGCTGTGAAGTTCGAAAAGCACAGCACAAGATGCCCTCAGCTGCGACACGAATACAAGGTTTATCGCGAGATGCAAAACTGCTCTGGCTTTGGGCGGGTCTATTGCTACGGGACCCACCACAGCTACAATGCCATGGTGATGGACCTTCTCGGACCGTCACTGGAGGACCAATTCACGAAATGTGGCCGGCGATTCACGTTGAAGACAGTTTTACAGATAGCCGACCAGCTGCTTGAGAGAATGGAGACAATGCAT…	MSGSTATAGSINNTFAPLINEQYRITKRLGGGSFGDIYLGLAQNGERVAVKFEKHSTRCPQLRHEYKVYREMQNCSGFGRVYCYGTHHSYNAMVMDLLGPSLEDQFTKCGRRFTLKTVLQIADQLLERMETMHSRHIIHRDVKPANFVLGPGRGCQKVFCIDFGLSTRYRHPRTLQHIPYRDGRSLTGTPRYASINNHLGLEQSRRDDLESVGYVLVYFLKGSLPWQGLKARNAKRKYNMILERKQAISIQQLCQRLPQQFAEYLAYCRSLKFDAKPNIPYLQGLLRELYKAQGHSTAGPLDWDWSKFDALLESNSECSSGDVGAVEATADTVQGFVAASTTAEGVTSRTQVAITDGKGQLPQANFSETPACDVRGSGALPARKITAANTDEEPCAEDV…	Efas-f_000040	F	GACCCGGCACGCTTTGGCGACATCTACCTCGGGTTAGCTCAGAACGGAGAGCGAGTGGCTGTGAAGTTCGAAAAGCACAGTACAAGATGCCCTCAGCTGCGACACGAATACAAGGTTTATCGCGAGATGCAAAACTGCTCTGGCTTTGGGCGGGTATATTGCTACGGGACCCACCACAGCTACAACGCCATGGTGATGGACCTTCTCGGACCGTCACTGGAGGACCAATTCACGAAATGCGGGAGACGATTCACATTGAAGACAGTTTTACAAATAGCCGACCAGCTGCTTGAGAGAATGGAGACAATGCATTCTCGGCACATTATTCACCGAGACGTCAAACCAGCCAACTTCGTGCTTGGGCCGGGTCGTGGATGCCAAAAGGTTTTCTGCATTGAT…	DPARFGDIYLGLAQNGERVAVKFEKHSTRCPQLRHEYKVYREMQNCSGFGRVYCYGTHHSYNAMVMDLLGPSLEDQFTKCGRRFTLKTVLQIADQLLERMETMHSRHIIHRDVKPANFVLGPGRGCQKVFCIDFGLSTRYRHPRTLQHIPYRDGRSLTGTPRYASINNHLGLEQSRRDDLESVGYVLVYFLKGSLPWQGLKARNAKRKYNMILERKQAISIQQLCQGLPQQFAEYLAYCRSLKFDAKPNIPYLQGLLRELYKAQGHSTAGPMDWDWS	SL-f_000040	F	TTCGAGAAGCACAGCACCAGATGCCCGCAGCTGCGACATGAATACAAGGTGTACCGTGAAATGCAGAACTGCCCTGGCTTTGGACAGGTCTACTGCTACGGGACGCATCATAGCTACAACGCCATGGTGATGGACCTTCTTGGTCCGTCGCTAGAGGATCAATTCACCAAATGTGGACGGCGTTTTACCTTGAAGACGGTTTTGCAGATAGCCGATCAGCTGCTGGAAAGGATGGACGCAATGCACTCACGCCACATAATTCACCGAGACGTGAAGCCTGCCAACTTTGTGCTCGGGCCAGGCCGTGGATGCCAAAAGGTGTTCTGTATTGATTTCGGGTTAAGCACACGCTTTCGGCACCCGCGTACTCTGCAGCACATTCCCTACAGAGACGGACGG…	FEKHSTRCPQLRHEYKVYREMQNCPGFGQVYCYGTHHSYNAMVMDLLGPSLEDQFTKCGRRFTLKTVLQIADQLLERMDAMHSRHIIHRDVKPANFVLGPGRGCQKVFCIDFGLSTRFRHPRTLQHIPYRDGRSLTGTPRYASINNHLGLEQSRRDDLESIGYVLVYFLKGSLPWQGLKARNAKRKYNMILERKQAISIQQLCQGLPQQFAEYLAYCRSLKFDAKPNVPYLQGLLRELYRAHGHSATGLMDWDWSKFDVPAGPGRSAKLAGSENVSLTGPRDVGAREVLGSAVTGPMLPSTAARGIMFRPQAEVIDTKSQTQQALSNATSAFDGTRLGAARARMGSDAEVDRRPCKDDVKAREFDDVEDAQGTESLPEADGRNDVLMGGANISGVHGQD…									UP-f_000040	F*	CAAGAGGACACGGGGATGGAGCCCGTAGTGCCCCCGCCCCAGCGGGAGCAGAGGGAGCCTGCCTTGACCGCGGGCGCCCTTGTCAAGAACCGGTGGACGGTGTCGGAGAAATTGGGGCAGGGTGCGTTTGGGGAGACCTATGCGGGGAAGGACCAGGATGGGACTGAGGTGGCCATCAAGGTGGAGCTGTGGGATAACCGGAAGATGGTGCTAAAGTTAGAGGTGATGGCACTCAAAAAGCTGCAGGCTTGTCCCTATATCGTCAAGTACATCAGCAGTGGCAGGCAGGAGGAGTTCAATTTCCTGGTGATGGAGCGGTTAGGGGAGAACCTGGCAGAACTGAGGAAGCGGGTGCCGAGCGGGAAATTCACCATGGGCACGACAGTGAGGCTGGGTATC…	QEDTGMEPVVPPPQREQREPALTAGALVKNRWTVSEKLGQGAFGETYAGKDQDGTEVAIKVELWDNRKMVLKLEVMALKKLQACPYIVKYISSGRQEEFNFLVMERLGENLAELRKRVPSGKFTMGTTVRLGIHMLNAIEGCHQLQYTHRDIKPSNFVIGLNDKCRQAFLIDFGLARKYRLANGDIRPARRQAGFRGTARYASINSHQSRELSRRDDLWSLFYVLVEFATGALPWRRLKDKDEIGKQKEKCTNADLCNAIEDGGEEFKKFMDHLNNLSFAADPDYDYLKGLLEGIRKRVGEEWDHPMDWERKGQQAVAPPLHSQVTGNRDRPVPGRHTSPPRPKPSPPPVERAEQSSEGYAEAQPENVSDEEKGEGEGEGGAHSREASPSPQE
Ec-13_002040	Esil-13_002040	M	CAAATCCGGCGACTGGCAAATCAAGCCCTGGTCGATGTGTTCAACGCGCTTGGGGGTGATCGATGGCGAAATAAAAGTGGCTGGCTCACACCTGGAACAGACGTTAAGAGATGGCACGGGGTGACCGTAAATGCGGGAAGCCTTGTGTCGCTCAACTTGATGAGCAACGACTTAGAG	QIRRLANQALVDVFNALGGDRWRNKSGWLTPGTDVKRWHGVTVNAGSLVSLNLMSNDLE	Efas-13_002040	M	GCAGACAACAAAGACTTAAGGCAAATCCGGCGACTGGCAAACCAAGCCCTGGTCGATGTGTTCAACGCGCTTGGGGGTGATCGATGGCGAAATAAAAGTGGCTGGCTCACACCTGGAACAGATGTTAAGAGGTGGCACGGGGTGACGGTAAACGCGGGA	ADNKDLRQIRRLANQALVDVFNALGGDRWRNKSGWLTPGTDVKRWHGVTVNAG	SL-13_002040	M	AGAACCTGCTCGCCTTTGATTAACGGTAACTTCAGGACGTCGATGCCTCGTGATGTTGGCAGCGGACAACATGGCCAGGCGATGGCCGAATCGCAAGAACGAGGGCGGACTCGGCGCAAGGCAGACCAAGCCTTGACCGATATGTTTCATTCACTGGCGGGATATCAATGGCGGAATAGAGATGGCTGGCTGACGCCTGGGACAGATGTGAAGACGTGGTACGGGATTACGGGGAAAGATGGGAACCTCGTGTCGCTCAACTTGATCAACAACGACTTGGAGGGGACAATACCTGATACCATCTCGAAGCTGGGCACGCTTAACGAGCTCAACCTGTCCTACAACTTTGGGGTGGTTGGGGTTCTGCCACGAGAGGTCGGCTACTTGACAAACCTGACA…	RTCSPLINGNFRTSMPRDVGSGQHGQAMAESQERGRTRRKADQALTDMFHSLAGYQWRNRDGWLTPGTDVKTWYGITGKDGNLVSLNLINNDLEGTIPDTISKLGTLNELNLSYNFGVVGVLPREVGYLTNLTMLHLYSAGLHGPIPESLSLLQHLEELWLNGNRLTGSIPDGLGYLRHLRELYLNANELVGGIPSSFGELSSLEGLNLSWNKLSGTFPASLCKMVSLKLLVLQGNEGLEELPPAEQGEELHKWLTGKRSDFGCPPRDCCLGVARAARLGQEHLSTCGGTEDGHAILSRFPSGSSFLRGPNFVRTERANLDPGSSPSLQDVLLDEAGPPFGLEALKAFAAAQLMEENIDFWIEVEHFRVVDEDDCLRAALAVCNRFIAPGTPMEINLGG…	NA				NA				NA
Ec-sdr_f_000110	Esil-f_000110	F	ATGTCATCGGCCTGGTTGCTGTGGTTGGACCGGATCAGGTTTTATATGGCTAGTTCTGCATACGACGACGACACCGGTTCCGTCTTCGCCGGCACCGAAGATCCGGTGCGCCTTCGGTCTCTGGCAAACCAAGCCTTGGTTGATATATTCAGCTCGCTCGAGGGCAACCGGTGGAGGAACAGGGACGGCTGGCTCACTCCTGGGACAGACGTGAAAATATGGCATGGAGTCATTGTGGAAGCCGGAAAACTGGTTTCCCTTAATTTAATCAGCAACGACTTGAAGGGAGCTATACCTAGCACAATCAACAACCTGGTGACGCTGGAAGAGCTCAACATGTCGTACAACTTCGGACTGGTTGGAGCTTTGCCGATGGAGGTTGGCAGTATGGTGAATCTT…	MSSAWLLWLDRIRFYMASSAYDDDTGSVFAGTEDPVRLRSLANQALVDIFSSLEGNRWRNRDGWLTPGTDVKIWHGVIVEAGKLVSLNLISNDLKGAIPSTINNLVTLEELNMSYNFGLVGALPMEVGSMVNLTVLHIYCAGIDGPIPESLSQLHRLEELWLNGNRLNGSIPDGLGLLSHLRELYLNANELAGSIPSSFSNLTSLEGLNVSWNHLSGGFPPCLGGMVSLRLLVLEGNDELEDRPPVSHGTELLEWLTSKRAAFACGYQPELDLSDLNGEPEGMFSTLEAQGQHGLSKRLCAGNQSAFDNVVPTGPCSEEKRQHVATYVNSETSPSLQDVLEGETEPPFHLEALRTFTASHLMEENIDFLLE	Efas-f_000110	F	GCCGACACCGAAGATCCGGTGCGCCTTCGGTCTCTCGCGAACCAAGCCTTGGTCGATATTTTCAGCTCGCTTGAGGGCAAGCAGTGGAGGAACAGGGACGGCTGGCTCACTCCTGGAACAGACGTGAACAGATGGCATGGAATCATTGTGGAAGCCGGA	ADTEDPVRLRSLANQALVDIFSSLEGKQWRNRDGWLTPGTDVNRWHGIIVEAG	SL-f_000110	F	CTCTTCCGATCTGCTGTACACTGCAACACACCCGGCCGCAATCTCGAACCAGAGATGGTGCGATCGACCATTGCTCCATGTGGCGACAGAACCATCACCTCCCTTCCAGGCATCCATCATCCTCTGCCGGTTCGGACATTGGAAAGCCAGTCCTTGGTCGACCTCTTCTCCTCGCTCGAGGGGGCTAGATGGAAGAATAAGGATGGATGGCTCACCCCTGGAACAAACGTGAAAAAATGGCATGGAATCACCGTTGACGCCGGAAACCTCGTTTCCCTGAATTTGATCAACAACGACTTGGAGGGAACTATACCTGGCACCATCTCCAACCTGGCGGCGCTGAGAGAACTGAACATGTCGTACAATGATGGGCTGGTTGGGACGTTGCCGATGGCAATC…	LFRSAVHCNTPGRNLEPEMVRSTIAPCGDRTITSLPGIHHPLPVRTLESQSLVDLFSSLEGARWKNKDGWLTPGTNVKKWHGITVDAGNLVSLNLINNDLEGTIPGTISNLAALRELNMSYNDGLVGTLPMAIGSMSNLTVLHIYSAGIHGSIPESISQLHWLEELWMNGNRLSGSIPEGLGYLPQLRELYLNSNELDGCIPSSFSMLTNLEGLNVSWNHLSGGFPACLGGMTSLKLLVLEGNDELQDQPPAEHGTELLQWLSSKRSAYARLSRRVLALNSGLEGRQNGPVQRKGRPSNGLSAILQEDERKTSSVGNRLPGDLDVEEFQLSTRHLKAEVHPSLQEVLQDEAGPPFNLEAFRSFTATQLMEENVEFLLEVNQFKIADSACLQHVGAALCS…	NA				NA				NA
Ec-13_002060	Esil-13_002060	M	AGCAACTACGTCATGAACGAGATGCCAAATAGATTGACGGGCCACCCACGATTGCACGACAACCCTGAGCTTGCCCTCCAGGAGACATTCGAAGAAGTAGACAAAGCACTCCGTGAAGCTGCGAAGGATAATGAGCACGTCTACAGTGGGACGACCGCTGCAGTCGTATTGTACAGAGATGATCGTGTTTGGGTAGCAAACGCTGGAGACTCCAGGGTTGTGCTAGGAACAGAGAAGAGAGCAGGTTCAGCCGACGGGAGCAGCGCGGAAGTGGAACCGTCAGGACTGGTGCCGGTAGCACTTTCAGACGATCACAACCCGGACAAGCCCGAAGAGTTGGAGCGCATCGAATCATGCGGTGGCTTCGTGAGCCCTCCTCCAGAGGAAGGACTGAGCGCC…	SNYVMNEMPNRLTGHPRLHDNPELALQETFEEVDKALREAAKDNEHVYSGTTAAVVLYRDDRVWVANAGDSRVVLGTEKRAGSADGSSAEVEPSGLVPVALSDDHNPDKPEELERIESCGGFVSPPPEEGLSARVWLDQALTRIGLQVIEIVQRGLLRGGGCEAAEACAEVIGAAATCWRRFEGAYRDDISCIVLRLPCFQAATDIDKSGSNER	NA	M			SL-13_002060	M	CCAAGAGCTTCTGTCAACTCAACGCAGGAACAGACTCCGACGGAAAGCTTGAGTCGTGGAGCTATGCCTTGGAAAGACGGTGGCCCGGATTCAAGCTCTCCACATTTGGACAGTGCAAAGCGAGACCCTTCGCAGCCGCACTCTTTCAAAGTGGCGCCACCAGCCGCTTCAGCGATGTGGGACGAAGGCAAACCATCTCTGGAGCGCGGTCAAGGGTGTCCGGTAAAGGGCGACAAGGAATTTCGACGGAGGCGATTGACATTCGCTGCTCAAGGAAGAATGTCATCCAACACGTGCCCCCCTTCGGTTCAAACCTCGCCTATCTACCGTGCGCTTGAACGAGAAGAGGAGAATGCCCACCGAGTAGCTCCCTTCCCGGCGTCCGTCTTGGGGATTTAT…	PRASVNSTQEQTPTESLSRGAMPWKDGGPDSSSPHLDSAKRDPSQPHSFKVAPPAASAMWDEGKPSLERGQGCPVKGDKEFRRRRLTFAAQGRMSSNTCPPSVQTSPIYRALEREEENAHRVAPFPASVLGIYSCHGAEPGWEEGQEDLAKINQDRACVVHPFMGSETCALFCIYDGHGERGEMVSNYAMNEVPRVLAGHPRLFDNPGLALQETFEKIDEALGEASQENEHVYSGTTALVALYRDNHLWIANAGDSRAVLGTANTEAPSKQGNHGLEYSGTVPVALSDDHNPDRPGELERIESCGGFVSPPPEEGLSARVWLDEELTRIGLAMSRSIGDHAVKDVGVIATPEIKFRDVAEGDAFLILASDGVWEFMENQEVVDLVQSCLCRGGGGEADE…	NA				NA				NA
Ec-sdr_f_000200	Esil-f_000200	F	ATGGGATCGAAGACATGTGCCTTGCTCTGCGTTTTTGACGGCCACGGCGAGCGCGGGGACATGATCAGCAACTACGTGATGAACGAGCTACCGGTAATGCTCGCAAGGCACCCCAGAGTGTTTGACGACCCTGAGCTGGCCCTGCAGGAGACGTTCGAAAAGGTAGACATGGCGCTCATTGATGCTGCGATGGAAGATGAACACGTTTACAGTGGCACGACGGCTGTTGTAGCCTTGTGCAGAGACGACTGTATCTGGGTGGCCAACGCTGGGGACTCCAGGGCCGTCCTGGGAACGGAGGAGAGAGAGGCTTCAGGCGAGCGCAGCGGCATCGACACGCGACCATCACGACTGGTGCCAGTTGCCCTATCCGATGATCATAACCCAGATCGACCCGGA…	MGSKTCALLCVFDGHGERGDMISNYVMNELPVMLARHPRVFDDPELALQETFEKVDMALIDAAMEDEHVYSGTTAVVALCRDDCIWVANAGDSRAVLGTEEREASGERSGIDTRPSRLVPVALSDDHNPDRPGERERIESCGGFVSPPPEEGLSARVWLDREMTRIGLAMARSIGDRAVKDAGVIATPEVSSISSRNSLSEEVDVKPLTHARK	Efas-f_000200	F	ATGACGAAGTGCGCCGATGGCACCCTTCCGTTTGGCACGACGGCTGTTGTAGCGTTGTGCAGAGACGACTGTATCTGGGTGGCCAACGCTGGGGACTCCAGGGCCGTACTGGGAACGGAGGAGAGAGACGCTTCAGGCGAGCGGAGCGGCATCGACATGCGACCATCACGACTGGTGCCAGTTGCCCTATCCGACGATCATAACCCAGATAGACCCGGAGAACTGGAACGGATCGAATCCTGTGGCGGTTTCGTAAGCCCTCCACCCGAAGAAGGCCTGAGTGCGAGGGTGTGGCTTGACCGCGAGATGACGAGGATCGGGCTGGCAATGGCAAGGTCAATCGGAGATCGTGCCGTCAAGGATGCGGGAGTCATCGCCACCCCAGAGGTTGTCGATCTC…	MTKCADGTLPFGTTAVVALCRDDCIWVANAGDSRAVLGTEERDASGERSGIDMRPSRLVPVALSDDHNPDRPGELERIESCGGFVSPPPEEGLSARVWLDREMTRIGLAMARSIGDRAVKDAGVIATPEVVDLVQERLERGGGREAADACAKVIAISAARWRQFEGAYRDDITCMVLRLPCFRTTAAAESCDPL	SL-f_000200	F	ACACGTCCTGTTGCCTGTACAAGCTTGGCGCGCCAGGAGGAGAAGGGGAGGAGCGAGCAAAAGCTGGTCGGTCTTCAACTACCAGCATCTATGACGTTCCAAGGCTCGGCGTCGCGCACAGGTCTGGACGAAGCTTTCCCAGAGACCGCGAAGCACAACGAGGATCATCGACGCGGAGATGAAGATGATGAAGGAACAATGATTTGCGACAAGGATCTGTCCAAAGTCAACCAAGATAGGGCGTGTGTGGTGTACCCTTTTCTGGGCTCGGACACCTGCGCCCTGCTCTGCGTCTATGACGGGCACGGCGAGCGAGGGGACATGGTCAGCAATTACGTCATGAACGAGCTCCCGGTGAGACTTGCAAGGCATCCACAACTAGCCGAGAACCCTGAGCTT…	TRPVACTSLARQEEKGRSEQKLVGLQLPASMTFQGSASRTGLDEAFPETAKHNEDHRRGDEDDEGTMICDKDLSKVNQDRACVVYPFLGSDTCALLCVYDGHGERGDMVSNYVMNELPVRLARHPQLAENPELALQETFEQVDQALADAATENEQIYSGTTAVVAFYRKDCVWVANAGDSRAVLGTKETETWTQGSSNAEEVTRMVPVALSDDHNPDRPGELERIESRGGFVSPPPEEGLSARVWLDREMTRIGLAMARSIGDHAVKDAGVIATPEVKVRSIGGSDSFLVLASDGVWEFMDNAEVVNLVQEYLQRGGGHEATEACAEIMAVAAERWRQFEGAYRDDITCMVLRLPCFRPDGATMSCDGVKSARGADLG	NA				NA				NA
Ec-13_002070	Esil-13_002070	M	AGGACAATACCCACCGAACGTGATGGTGTTCCTAGTCGGCCGGAAGCAGAACGTCCACAGGCAGCAAGACTGAGGCACGCCAACGCCTTTACAGGTGGTTTTGGTGTTGGAGGGGGAGGTGGAGCTGGCGCAACAGGCGTAGATGGTGTTGGGAATGGTGCCGTAGCCGGCGGGCATGTGCACTTCCAGGCTGGTCTTGGATTCTTCCCTTCATTGTTCGGACTTCAGTTTGTAAGTGGCACGAATTGTTTG	RTIPTERDGVPSRPEAERPQAARLRHANAFTGGFGVGGGGGAGATGVDGVGNGAVAGGHVHFQAGLGFFPSLFGLQFVSGTNCL	Efas-13_002070	M	TTGTGCGGCCCGTCTTACCCTGCCTTGTCTCCGCGCTCGGGACATGACGCATTCGTCCTGCAGTGGCTGAACACCAACCAAACGGAATGTCCGGTGTGCAAGGCCGGGGTCACAGCTAGCAACGTTATTCCCCTTTACGGCAGAGGGGCGGAAAGCGTCGATCCGAGGTGGGGTGGTAACACTGGTTATTCTTCCCGTAAATTCCTGTGA	LCGPSYPALSPRSGHDAFVLQWLNTNQTECPVCKAGVTASNVIPLYGRGAESVDPRWGGNTGYSSRKFL	SL-13_002070	M	ATCATCCCCGTTTCGATCGGGCTCGGTATAGTTTGTTGTCGACTGCCGCTGCTGTTGCTCTCTCGCGTTGCTCGGAAGATGGCGAGCCAGCGTCCCCCGGAGACGGCGAAAGCATCCGCAGCGAACGCTTCAGGAGAGGAATCGTACTTCGAGTGCAACATCTGTCTGGATGGGGTGCGGGAGCCGGTGGTAACTCGTTGTGGGCACCTCTTCTGCTGGCCGTGCCTGTACAGGTGGCTCAGCACGAACCAGACGGAGTGTCCCGTCTGCAAGGCCGGCGTCACGGCGCGGAACGTCATCCCTCTCTACGGCAGAGGCGCCGACAACATCGACCCCAGGACCAAGCCGACGGGACCAGGCAGCGTCCCCAACAGACCGGAGGCAGAGCGACCAGCGGCC…	IIPVSIGLGIVCCRLPLLLLSRVARKMASQRPPETAKASAANASGEESYFECNICLDGVREPVVTRCGHLFCWPCLYRWLSTNQTECPVCKAGVTARNVIPLYGRGADNIDPRTKPTGPGSVPNRPEAERPAAERPRPPLCGPSYPALSPRSGHDAFVLQWLNTNQTECPVCKAGVTASNVIPLYGRGAESVDPRWGGNTGYSSRKFL	SJ15797	A	ATGGCTACGCCAAGGTCCTTTGATTCGGAAGGCGCGCCGCCGTTCTGTCTGGACGAGGATGATGGACGCTTAATGGCAACAAGTCGGGACAGGGCTGTGAGCTCCCGTGTTCTTGGAGGTCGGGAAAGCAACGAAGACCATGCCGAGCCCAACACAGGGAAAGAGGCTGCAATGAAGGGAACAGCAGGAGTTCGAGCGGGATTCCAGCATTCTCCTCAGGCCAAAGACTCAGGTGAAGATTCACCCTTCGAGTGTAACATATGCCTGGACGGGGTGACGGAGCCGGTGGTCACGCGGTGTGGCCATCTATTCTGCTGGCCGTGCTTGTACCGGTGGCTCAATACGAACCAGACGGAGTGCCCGGTGTGCAAGGCTGGGGTTACGGCTACAAACGTAATT…	MATPRSFDSEGAPPFCLDEDDGRLMATSRDRAVSSRVLGGRESNEDHAEPNTGKEAAMKGTAGVRAGFQHSPQAKDSGEDSPFECNICLDGVTEPVVTRCGHLFCWPCLYRWLNTNQTECPVCKAGVTATNVIPLYGRGAANVDPRTKSSGHGNVPSRPEAERPRAERPRTPNPFSGGVGVGGGWGGLGANGTGMEAGGAGATGGHLHFQAGLGFFPSLFGLQFQSFTFLAEHGNSRSEERGRNAAMSAREEEASGTTGMGGGGAATGGRRLAAVGDERLLVAEEAQQDFLSRLLLVLGSFVVLCLVLF	MP-13_002070	M	TGTAGTCATTCGTCCGATGGCGGCGCGGCGTGCAGGAACACCAAACGTTCCGGACCTTCGTGTGAAGACTCGTACTTCGAGTGCAACATTTGCTTGGATGGAGTGCGGGAGCCCGTCGTGACCCGGTGTGGGCATCTTTTCTGCTGGCCGTGCTTATACCGGTGGCTCAACACCAACCAGACGGAGTGCCCGGTGTGCAAGGCTGGGGTCACAGCTACAAATGTCATTCCTTTGTACGGTCGCGGGCCCGATAACATCGATCCAAGGACGATGTCTACAGGGCGTAATGGTGTCCCTAGTCGACCAGATGCAGAGCAGTGGTGCTGTTGCTTTAGCGTAGTCTCCTCATTGCGTGTAGAACTCCTTTTGAATTGCCGCGCCGTATCGCGGCCGTTTCCC…	CSHSSDGGAACRNTKRSGPSCEDSYFECNICLDGVREPVVTRCGHLFCWPCLYRWLNTNQTECPVCKAGVTATNVIPLYGRGPDNIDPRTMSTGRNGVPSRPDAEQWCCCFSVVSSLRVELLLNCRAVSRPFPTPGFLDVEGPSPNLRYARGLLFWVLYPPCPRQGMLPCYRILACD	UP-13_002070	M	ACAAGCCGTGGTTTAAGTTGTCGCCCCTTCTCCACCCTGGGGAATCGATACGGCAACATGGAGAGCAAGACCTCGTCGCCAAGGCAAGGAAAGATCGAAGACGTGGAATGCCTTGCAGATGAGGAAACCGTGGATACGATGCCTACGACAGGAGCATGCCCGAGAGGAATGCGCCGACTGAACGCCTCAGGTGAAGACTCGTACTTCGAGTGCAACATTTGCTTGGATGGAGTGCGGGAGCCCGTCGTGACTCGGTGTGGACATCTTTTCTGCTGGCCTTGCTTATACCGGTGGCTAAACATCAACCAGACAGAGTGTCCCGTGTGCAAGGCCGGGGTAACCGCTACGAATGTCACACCTTTGTACGGTCGCGGGGCCGATAACGTCGATCCGAGGACT…	TSRGLSCRPFSTLGNRYGNMESKTSSPRQGKIEDVECLADEETVDTMPTTGACPRGMRRLNASGEDSYFECNICLDGVREPVVTRCGHLFCWPCLYRWLNINQTECPVCKAGVTATNVTPLYGRGADNVDPRTTPTGRDGVPHRPDAERPRAERPRPPNPFSGGLGTGGAWGGFGGGVTGMEGAGAGAFVGGQVHFQAGLGFFPSLFGLQFQSFTSLVGPTNAGESGGGYPDGGGEEGEREVVTRPDGVGTSSGGATGNVDRVSLSMTEEAQQAFLSRLLLMLGSFVVLCLIAF
Ec-sdr_f_000070	Esil-f_000070	F	TGGCTCAACACAAACCAAACGGAGTGTCCGGTGTGCAAGGCAGGAGTTACAGCCATGAACGTCATTCCTCTTTACGGGCGTGGAACAGACAACATTGATCCCAGGTGGGGAGGATTCATGGTTCGAATGCAACATCTGCCTGGAAGGAGTGAAGGAGCCTGTCGTAACGCGCTGCGGTCATCTGTTCTGCTGGCCATGCTTGTA	WLNTNQTECPVCKAGVTAMNVIPLYGRGTDNIDPRWGGFMVRMQHLPGRSEGACRNALRSSVLLAMLV	Efas-f_000070	F	GCTGGGGAATGTGCCGGGTACGTGCTCCGCCCGGTCGTATATACCTGCAGGACAAAGCGAACAGGGCAGGACAGAGTTCCCAGTCGACCAGAAGCAGAACGGCCACAGGTGGAAAGACCCAGGTCCCCGAACGCCTTTGTTCCTGGTCTAGGCGTGGGAGGGGGATGGGCAGCAGCGACGGAGGGTGGAGGAGTGGGGGGTGTCGCCGGAGGCCATGCGCAGTTCCAGGCCGGTCTGGGGTTCTTTCCTTCCTTGTTCGGCCTGCAGTTTGTGAGTGGCATGAGATGA	AGECAGYVLRPVVYTCRTKRTGQDRVPSRPEAERPQVERPRSPNAFVPGLGVGGGWAAATEGGGVGGVAGGHAQFQAGLGFFPSLFGLQFVSGMR	SL-f_000070	F	CTCAGCACGAACCAGACGGAGTGTCCCGTTTGCAAGGCCGGCGTCACGGCGCGGAACGTCATCCCTCTCTACGGCAGAGGCGCCGACAATATCGACCCC	WLSTNQTECPVCKAGVTARNVIPLYGRGADNIDP					MP-f_000070	F	ATGCGTATACTATGGTACCGCATTGTGTTATCATTACTTGCGCTAAGTGAAGATTCATCTTTCGAGTGCAATATATGCCTGGACGGGGTGACGGAGCCGGTGGTCACGCGGTGTGGTCATCTTTTCTGCTGGCCATGTTTGTACCGGTGGCTCAATACCAACCAGACGGAGTGCCCGGTGTGCAAGGCTGGGGTCACGGCTACGAACGTCATTCCCCTTTATGGCCGTGGGGCTGCAAACGTTGACCCCAGAACGAAGTCTGCAGGACATGGAAATGTACCCAGTCGACCGGAGGCAGAACGGCCACGAGCAGAGAGACCCAGGTCTCCTAACCCGTTCGCTCACGGCGCAGGGATGGGCGGAGGGTGGGCTGGGTTTGGGGCAAGTGGGACAGGGATG…	MRILWYRIVLSLLALSEDSSFECNICLDGVTEPVVTRCGHLFCWPCLYRWLNTNQTECPVCKAGVTATNVIPLYGRGAANVDPRTKSAGHGNVPSRPEAERPRAERPRSPNPFAHGAGMGGGWAGFGASGTGMEAGGVGATGGQLHFQAGLGFFPSLFGLQF	UP-f_000070	Fb	AACACCATTGACGCAGACCAGCTGGACCGAGTACTACGATCCTCCTCGCCGTCTTATTATATCCTCAACTTTGGACCGGTGCGTGTACTATTTTACACCACAGCATCCATTATGGCTACGACGAGACCCTTCGAAGCAGAGGCCGCGCCACCGCTCTGCCCTGACGAGGACGGCGAACGACGATCTTTGATGTCAAGTGGGAACAGCAGTGGTGGAAGCCCCCGCGTTCTTGGTGAACGGGAAAACTGTGAAGACACTACTGAGCGCAACACAGGTGAAGATTCGTCCTTCGAGTGCAACATATGCCTGGACGGAGTGACGGAGCCGGTGGTCACGCGGTGTGGCCATCTATTCTGCTGGCCATGTTTGTACCGGTGGCTCAATACCAACCAGACGGAG…	NTIDADQLDRVLRSSSPSYYILNFGPVRVLFYTTASIMATTRPFEAEAAPPLCPDEDGERRSLMSSGNSSGGSPRVLGERENCEDTTERNTGEDSSFECNICLDGVTEPVVTRCGHLFCWPCLYRWLNTNQTECPVCKAGVTATNVIPLYGRGAANIDPRTKPAGRENVPSRPEAERPRADRPRIPNPFTGGGWGGFGGSGAGMEAGGGG
Ec-13_001750	Esil-13_001750	M	GGAGTGTCCATCGAGCCAAGACCTGACTGGCAAGACATCCTTGATGCAGCTGCATCATCTCTCATAGGGAGTAACGCGTGCGGAGCCGTCGGCGGAATGGAACCGCTATTCAACGCGCTACCCTTGTGGGCATCTGTGGTGCATGTGGCGCCACATCGGGTTTCAGTTCACCAACGCAGCTCTGACGGCGTCACGGATGGCGTGGCTTTTCAACACTCCCTCGTGAACGGAGATGGCGGGCTTGTCTCAACGGCGAAGGAAGAAATGTACCACAACAGCGTTCAAGATGCATTCGTCATTTTCAACACCCATCCTTCCGGTTCTGCGAGGTTTGTCGAACATTCTCAAGCGTTGACGAGCGGACACACCCGTTCTTCCGAAGCACGCCGCATGGTGCCC…	GVSIEPRPDWQDILDAAASSLIGSNACGAVGGMEPLFNALPLWASVVHVAPHRVSVHQRSSDGVTDGVAFQHSLVNGDGGLVSTAKEEMYHNSVQDAFVIFNTHPSGSARFVEHSQALTSGHTRSSEARRMVPKKTSPPRRKRKDPNRPRGYVSAFNFFVIDKRPAYVRDVQGVSPGNNNEVNKMLGQAWKELTTEEKNCYQARSDVDKCRYLKQETIGVRCSKSTAAKSLMSKTFGQRWSGGHQFSRMSHEDKSGNPGTKEKCRMPDEEKELYKELEEADKTFYNTTA	Efas-13_001750	M	AGAGTGTCCACCGAGCCAAGACCTGACTGGCAAGACATCCTAGATGTTGCTGCATCATCGCTCAGTACGGATGGCCATGGTAGTAGCGCGCGCGGGGCCGTCGGCGGAATGGAACCGCTATTCAAGGCGCTACCCTTGTGGGCATCGGTTGTGCACTTGGCTCCACATCGGGTTTCAATTCACCAACGCAGCGCTGACGGCGTCACGGATGGCGTGGCTTTTCAACACTCGCTCATAAACGGAGATGGTGGGCTTGTCTCAACGGGTAAGGAAGAGATGTACCACAACAGCGTTCAAGATGCATTCGTCATTTTCAACACCCATCCTTCCGGTTCTACGAGGTTTATCGAACAGTCTCGAGCCTTGACTAGTGGACATACCCGTTCTTCCGAAGCACGT…	RVSTEPRPDWQDILDVAASSLSTDGHGSSARGAVGGMEPLFKALPLWASVVHLAPHRVSIHQRSADGVTDGVAFQHSLINGDGGLVSTGKEEMYHNSVQDAFVIFNTHPSGSTRFIEQSRALTSGHTRSSEARRMVPKKTSPPRRRRKDPNRPRGYVSAFNFFVKDKRSAYVRDAQGFSPGNNNEVNKKLGQAWKELTTEEKNCYHTGTIHPVHRGVKRTGNADADKETGRPSPAYTHFTNQETIGVRCSKSTAAKSLMSKTFGQRWSGGRQFSRMPHEDNFGDPGAKDKCRMPDEEKELYKELEEADKTFYNTTA	SL-13_001750	M	TCCATCTTACACGTTGATAGCTGTGGCTCCCTTGCGTTCGACGCCATTGGATACAACGTCCATCGTTGTCAAAGCCTTACCATGTATGCAGCCTTCATTGATGTAGGGCGTCAAGACTCTCAACTAGTGGTCGGCTTTGAGACAGGTCAAGAACTCGGTTTATCGAAATCGCCTAACGGATCCAACGTCCTCTCCACCGGATTGCACACAGAAGGAGCCGCATCTGATATCCTGGGATCGAGTGAAGAAGCCTTTCGGCCACCAGGTACCATGCACTGGGCTGGATTCTCGTCAGCGAGAAGAGCCTGGGGAATGCAGGGTTCTAACAAGAACGGCGTCCTCCACACTGGGGTTGCTGAAAGTGCCCGCGAGGCTGGGTCTCATTTTCTGAGTTCGACG…	SILHVDSCGSLAFDAIGYNVHRCQSLTMYAAFIDVGRQDSQLVVGFETGQELGLSKSPNGSNVLSTGLHTEGAASDILGSSEEAFRPPGTMHWAGFSSARRAWGMQGSNKNGVLHTGVAESAREAGSHFLSSTCGALDGLLGMEEYDGIDKFCVFAYDGLHAAILVVEDHTTVFCAQVVAGLYDLGSSKMPMETRFGWQESLTAAASRLASDDIKCSTKEALVKEELPTKKPPFLATTVHMAPDRVSVHQRCADGATEGSSVQYAIGKQHLENLQDAFIVFNTHSACSERFVQRSAALASCYSTCSEAHVVIPASIIPPRKIRKTKKDPRGPRGYVSDFNFYVKAKRPAYVRDAQIDSAHANNEINKELGKAWKRATAEEKNHFKLLAEMDKARYVEEV…	SJ05808	M	ATGGGCTCCACGGAGAGCATTGCGGGCGGAGCGCCTTGTGGATTAAATTCGCGTTCCGAGTGGTTCTCGTCCCCAGCTTGGTCTTCAGTGGTACATATGGCGCCGAGTCGGGTGGCAGTACACCAACGATGCGCTGACGAAGCCACCGAAGGCCTCTCTGTACACTACTTCCGCACAATGGTTGAGGATCGCCACCTCGGTTTGTCTTCTATTCACGATCGACAGGATAATGTTCAAGATGCATTTGTCATATTCGGCACCCACTCGCGTCACCCCGTACGATTCAGGCAACACACCGGTGCCCTAGGGCACGGAAGAAGCAGGTATTCTAAACCACAAACCCGAGTTGCGTATGAGAGCGCCACGGCACCCAAGCGGCATAAGAAGGATCCGAACCGT…	MGSTESIAGGAPCGLNSRSEWFSSPAWSSVVHMAPSRVAVHQRCADEATEGLSVHYFRTM VEDRHLGLSSIHDRQDNVQDAFVIFGTHSRHPVRFRQHTGALGHGRSRYSKPQTRVAYES ATAPKRHKKDPNRPRGYISAFNFFVKDKRPTYVQSRPNAQGHSLEHNNEINKMLGKVWKT ATEQEKKTYEEKATADKVRYLKEMSAYRPPEGYERIAPRINVPKGFSTVSWDPDVIAGTT AQPCRRPWPAYTHFAHQ	MP-13_001750	M	GAGGGAGAAGAGTACGTGCAGCTCTTGCCGAACTGCAGGGCGCCCTTTCGGATGGTTGGGAACCAGAGACGGAGACCAAAGCGTCGGAAGCCGGTCCGGATGTCGAGACGGACGGCGCTGGAAACTGGTACGACGTGTTGGGTTGGGTTTTCATCACGTAGACGGGCATGGGCGATGGAGGGGTCCTTCAGCGATGGTGTGCCACCTGCCAACATTTTTGATGACGTGCGCAATGCTGGGCTGTTGTTCCTCGATTTGGGATGCGAGGCGCTGGCCAGTCTCTCCGCGGCAAACGACTTGGACGGAATTGGCAGGAGTCGCATCTTCGCATACGATGGGGTGCACGCAGCCATTTTGGTGACCGAAGGACGCACTCGAATTTTCTGCCAACAAGTTTCA…	EGEEYVQLLPNCRAPFRMVGNQRRRPKRRKPVRMSRRTALETGTTCWVGFSSRRRAWAMEGSFSDGVPPANIFDDVRNAGLLFLDLGCEALASLSAANDLDGIGRSRIFAYDGVHAAILVTEGRTRIFCQQVSSGLYDLGSLDLGCEALASLSAANDLDGIGRSRIFAYDGVHAAILVTEGRTRIFCQQVSSGLYDLGVSTIPRSDWRDALSATVKSLVVGSTESIADGVHHGFNSRSERFSSSSWSSVVHMALSRVAVHQRCADGATEGLSVHYFRTMVEEDHIGFTPIQDGRQDNVQDAFVIFGTHSHDLARYSQHASGLGRARSRPPKPQARVAHESATAPKRHKKDPNRPRGYISAFNFFVKDQRQTYVQSRPNAQGHSLEHNNEINKMLGKVWK…	UP-13_001750	Mb	TCTACCGCTCGTTGTGTTATCCTTGACCAGAGTCCGGAGTCTACAGTGATACCTAGCACGCTTTTCAACGGACGTTCGCAACGCACGATGTACGTCGCTTTCTTCAATTCTGGATGCCAGGACTCTCAAGTCGTCCTTGCCTTGGAGAACAGTGCAGGGTTCGTGCGGTCACAGGGTCAAAATGGGGCGAGTGTGTTCTCTACAAACTTGACAAACAGCGGTTCAGGTACGGCGTGCTGGGTTGGCCTTTCATCACGTAGACGAGCATGGGCGATGGAGGGCTCCTTCGAGAATGATGTCCCCTCTGTTGACCTTGTTGATGGTGTGCGCAATGCTGGACTTCTGTTTCTCGACCTGGATTGCGAGGCGATTGCCAGTCTCTCCGCTGCAGACGATTTC…	STARCVILDQSPESTVIPSTLFNGRSQRTMYVAFFNSGCQDSQVVLALENSAGFVRSQGQNGASVFSTNLTNSGSGTACWVGLSSRRRAWAMEGSFENDVPSVDLVDGVRNAGLLFLDLDCEAIASLSAADDFDGIDRSRVFAYDGVHAAIMVTEGRTRVFCQQVSSGLYDLGVSINPRIEWRNALGAAASSLFVDSMEGAADGTLGGFSSPSERFSLSAWSSVVHMAPNRVAVHQRCTGGATKGLSAHYFRTMVENDPMQHGRKNSVQDAFVIFGRHSHDAVRLGPHPRALVHGKHRPSKPQARVAYESATAPKRHKKDPNRPRGYISAFNFFVKDKRPTYVQNRPNAQGHSLEHNNEINKILGKVWKMATEHEKKTYEEKATADKVRYLKEMNAYRP…
Ec-13_001770	Esil-13_001770	M	GGGTGGTCCTGGCCACGTGTCTGCTGCTAGGAGCGCCAACATTTGTTGGGTCGGCCAACCTTCAGGCTCACGCAACAGTTAACGGCGGTGCCGTTCAGAAAACCTCGTCTCTGCTAAATGCGAGCACGGTTCAACAGTCTACCACCAAAAGGCTTCGGCAGAAACTACTTGAGGTGGAAACGTTTGTGGCATTTCTTCGACATGACGTCCTGCACACCTTGCCCGAGCGGGTTGCTCCTCAGGTGCAAGACCTCTTGGTGACTGTCGAAATGTTTACCGTGAAGCTAGACAGGCTTCTATCACGGGCACCATATCCAGACACAGCTCCTGGAATGAAGAAGGCCGTCATGCGATCGGAATTGCTATGTCCTGTCATCGACCAGCTAGCTTCTGCTCTTG…	VVLATCLLLGAPTFVGSANLQAHATVNGGAVQKTSSLLNASTVQQSTTKRLRQKLLEVETFVAFLRHDVLHTLPERVAPQVQDLLVTVEMFTVKLDRLLSRAPYPDTAPGMKKAVMRSELLCPVIDQLASALAGLSGAASGEQATVVLQIKSSLVTARALDPSAYLPNLPMSHAANGAKVVLSFAQVIAATPLVLVVRRSNTLRSFLGGLDMVNFTVPKVFSATCLVHGTFYGELVFKTIAPLGVAVVIMGVRTFLRSSCVTDGRTCRGRSMKCNECLLALTYFVQTPAINAALRTLSFDEPRAWWYEIFETCRRILLTSLVFFATRTSMQLWIAMGFTCSPPGSRDEDICSKTTENATHKSTSSPTSLSQAQSRRTQMECCARRKQDHSAPATVADAH…	Efas-13_001770	M	TGCTTCACCGACAGCTGTACATGGCGAGCCCGATCAGTGAAGTGCAACGAGTGCCTCCTGGCGCTTACGTACTTTGTGCTGATTCCTGCCATAAACGCGGCTCTCAGGACACTTTCTTGTGAGTCGTTCGATGATGGCCGCACCATGCTAAGAGCGGACTACTCCATAGACTGCAATGATGCAGAGCATCCGAAGTACCGAGCATTAGCGGTGGTCATGGCTGTGGCGTACCCGACCGGCGTGCTTGCGCTCTACTCTGGCGTGCTTTGGAAACATCGACATCTGTTATATCCTAGCGAGATACACGGTCGGCCTAAAGAGGATGACACAATTGCTGAGGAGGCTAAACGGGTCAACGCACTCACGCTTCAGCCATTTGCGCTTCTGCACGATGCATAC…	CFTDSCTWRARSVKCNECLLALTYFVLIPAINAALRTLSCESFDDGRTMLRADYSIDCNDAEHPKYRALAVVMAVAYPTGVLALYSGVLWKHRHLLYPSEIHGRPKEDDTIAEEAKRVNALTLQPFALLHDAYEPRAWWYEIFETCRRILLASLGYFATRTSMQLWIAMGFTVVRDRVLVANN	SL-13_001770	M	CAGCTCGAACCGACGACAATGCCATCCGAGTTTCCATTCCGCGTGTCATATCTCAGACTCCTGTACATACTAAATGTATCCCGCCTGGGGTCGTGCGCAGGAAATTATTGTGTAAACAGAGGCGGAGCTCTTTTCAACGATGCATGCTTCGTCTTTGCCGATCCTGGCGTCAGCTGCACCGACAAATGCTTGATGGAAGGGGCGTTATGTGATGAAGATGCTTTGGACATGAGCCACACGGAATGTGAGAGCGTTTTAGCTGCTCTTGGAGTTGATATTGCTTCAACGACATCAGAATGGTACTACAACTTTGGACCCGCGGACGACTTCGTGCGATCGGCCTTCTGGACAAGCTCAATTTTCGACGAAAATACTCAAAAAATCGTCGATGCGGTTCCT…	QLEPTTMPSEFPFRVSYLRLLYILNVSRLGSCAGNYCVNRGGALFNDACFVFADPGVSCTDKCLMEGALCDEDALDMSHTECESVLAALGVDIASTTSEWYYNFGPADDFVRSAFWTSSIFDENTQKIVDAVPSFRTAGCIVSPTFDATDQDSFTSLPRLTGEVTYGTMDAAEAHNFIAETPTCGGASLVYRRVCACFFLTPPPTPSPTTPFPSPTSAPHLPTSPPAPPSSPRPTPFPTSLSTILPTPNPTSSSVPHQTPTPTRSHIAPGYWRTSHSSTDVRLCPVPHLCDGGIGGADDLCLGDNTGPYCLVCPSSHFASVSGVCLVCGSTSGLTASYVVGLVLAVSILLGGLVLVGPTSSQPHRTGKNDEIPCTDTVEDLNAQVQQQSAIGKLTKKLL…	SJ05597	A	ATGACGCTTAGAGAGCCGTTTATTTCCTTCCTGCATGTCGGCCTGTTCCTCGTACTTCAGGCATGCCTCACTGCCCTGTGCACAGGTGTAGCTCTAGATTGCGTAGACGACGTTGGGGGCACTGTCTTCGAAGGAATGTGCTTCGCGTTCGCCTCTGTCGAAGTGAGTTGCACCACCAGATGTAATGATGTGGGAACCACCTGCAACGAGGCTGCGTTGGACATGGACAACCAGGGTTGTCTCGACGTTATTACCGCCATGGGAATCGACCTATCTACGTCAACCTACACGTGGTACTTCAATTTTGGAGAAGCAGGGGTCCTTCCGACCCTATACTTCACATCCTCGAGATTCGACGAGAACATATTTAAATTCCCGACAAATTCCGATGGCAATTTT…	MTLREPFISFLHVGLFLVLQACLTALCTGVALDCVDDVGGTVFEGMCFAFASVEVSCTTRCNDVGTTCNEAALDMDNQGCLDVITAMGIDLSTSTYTWYFNFGEAGVLPTLYFTSSRFDENIFKFPTNSDGNFRTLGCVVSPVYDAEDQDSFVDGPGNAQFVGNKRDELEAHNFDNFPPTCDLSSPILRRVCACTIDTPAPTPAPTIAPTPSPTPPPTTSPVVPTTPSPLPPATPSPPPALTPAPSLSNYYPSPLVDGGGYWRTSGASSDVRSCPIPDLCEGGTGGGDDLCFGNNTGPYCMVCPSSYFASVNGVCLECGSTSGVTTVQVAGFLLSVCLLLVGATLVGPCIRKASVAGGDTPEIEPLPLFSITAGASIPQSALTTLRQKTVELGLLVACL…	MP-13_001770	A	CTGCTGGTAGGAGCGACCTTCGTCGGAACGTGCATCAGGAAAACGTCGGCTGCTGGCGATGACACCCCAGAGATGGAACCTCTCCCGCTCTTCAGCATCACAACTGCAACAGCTGCAACTACTCCGCAGTCCGCCCTCACAACACTCAGGCAAAAAATTGTTGAACTTGGACTGCTAGTTGCGTGTGTTCGACGCGATCTGACGGGCACTTTCTCTCATCAGCTGGATGCTCAGCTGCAGTATCTTCTGGTTACCATCGAAATGTTCGTTCTAAAACTCATCCGGGTTTTACCTCGGGTGCCGGATCCGGACCCGGACAGAACAACGAAAAAGGCAATTTCCAATGCGCAGTTGCTGTGTCCAGTCGTCGACCAGATAGCTGCCGGCCTTGCCGGCCTG…	LLVGATFVGTCIRKTSAAGDDTPEMEPLPLFSITTATAATTPQSALTTLRQKIVELGLLVACVRRDLTGTFSHQLDAQLQYLLVTIEMFVLKLIRVLPRVPDPDPDRTTKKAISNAQLLCPVVDQIAAGLAGLSGAAPVEATTVIQHARSVLSTARTLDPSAYLPNAPTNDAASVAKVMVSFVQVMATTPMPLVVRHSDSLRSFLGGLDMANFSAPQGFSIACLVQDSNFYGELVFKIAGPLVMAVVICGAERVQRLRASTTKRKGRGQAISRTEWLLALTYLLVTPATNVALRGLPCETFDDGSNMLRADYSIDCDAAEHGRYRVLAGTMAVVYPLGVFTFYTFVLWRRRHLLYPMQVRGRPREDKAIAEEAKRLNELALRPFAILHDAYEPRAWWFE…		A	ATCCAGGCATGCCTCACTGCCTTGTGCTCAGGCGTCGCTCTAGATTGCGTAGACGACTTGGGCGGGGCTGTGGTTAACGGGATTTGCTATATATTTTCCTCGGTTGAGGTCAGTTGCACCGACAAATGCATTGAGGTGGGAACTACCTGTAACGAGGCTGCCTTGGCCATGGACAACCAGGGTTGTTTGGAGGTCATCACCGCACTCGGAATCGACCTGGCCACGACAACCCACTCTTGGTTCTACAATTTCGGGTCCTCCATCTTTCCGACCCTCTACTTCACGTCTTCGGTGTTTGACGAGAACGTATTTCGTTTCGTGACAGGTTCAAACGGGAACTTTCGAACCATGGGGTGCGTCGTCAGTCCGGTCTACGATGCTACCGATCAGGACAGCTTC…	IQACLTALCSGVALDCVDDLGGAVVNGICYIFSSVEVSCTDKCIEVGTTCNEAALAMDNQGCLEVITALGIDLATTTHSWFYNFGSSIFPTLYFTSSVFDENVFRFVTGSNGNFRTMGCVVSPVYDATDQDSFTTGPGNINFVGNKRDALEAHNFEVYPPTCDLSSPVLRRVCSCTGDDLCFGNNTGPYCMVCPSAYFASVSGVCLECGSASGVTTVQVAGFLLAVCLLMVAVTLVGPCVLMKTSATGNDDTPPVEPLPLFSITAGATPQSALTTLRQKLLELGLLVACLRRDLTGTFSHQLDAQLQDLLVTIEMFLLKLIRILPRVPEADPDRTMKRAISNAQLLCPVIDQLAAGLAGLSGAASMEATTVILHVRSVLATARTLDPSAYLQNVPTNDA…
Ec-13_001890	Esil-13_001890	A?	TACCACAACGTGCACCACCGCAATTGTTTGCGGGACATAGCCCCTGGGACGGAT	YHNVHHRNCLRDIAPGTD	Efas-13_001890	A?	ATGTCTCCGCTGTCGCATCAGGTGGGCGAGAATATCCCAAACATCACACGGCCCTATGCGTTTATAGACCTTAGGATCCGCCGCACTGCCGAAAAATGTCCATATATTTTGCTGTTCCTGTGGCCAATTTTCTTCGTTGTTGCCTCGCAGGAAGAGCCCACCTTGAAGCCTCGTGACTTCAGGAAGACGTTGCAGAGGGGTACAGAGCGTGTGATGAAGTGCAACTGTTGCACTAGGTCGGGCACTGAGCAAGTGGAGATGGCAGCCAGGGGGGATTTTGGAACACCAAATCCAATTAGGACCGATCGTACCTCCGTGGACGTATCGGGTTTTTCTTTATCCAGCCGCCCCCGTGAACAAGATGGACCGCGACGAACCTCTTCGTATTCCTCCGCAGTC…	MSPLSHQVGENIPNITRPYAFIDLRIRRTAEKCPYILLFLWPIFFVVASQEEPTLKPRDFRKTLQRGTERVMKCNCCTRSGTEQVEMAARGDFGTPNPIRTDRTSVDVSGFSLSSRPREQDGPRRTSSYSSAV	SL-13_001890	A?	CAACCAGGGTTGTTTCAATTTTTCTCCCTGGCCGACGGCTTCTTCTCGTCCCGCTGGCAGACGGCTACCAACTACGAAGTACTTGTCTCGAGCAGCCTTTTCCGCGAAAAGGAGCAGCGGCAGCAGCGGCAGCAGCAGCGAAAACATTCGTACCAATTGGTGCTCCTTTACATCGGTGAAATGTGGAAGGCTCGCGTCGTACATGAACGTCATCGACGCCGCCACATCCTTCTTTGGGCCATCCTCATCACTGCGATTCTCGCCTATATCGGCTGGGCACTCAGCAGGCTGCATGACCAGTATCTCAACCCCTCGACGTCCTTCTCTTTATCGAACGAGGTGTACAGGTATCCGGACTTCGGGGTATGCCTGTATCAAGGCAACGGCTGCGATAGTTTT…	QPGLFQFFSLADGFFSSRWQTATNYEVLVSSSLFREKEQRQQRQQQRKHSYQLVLLYIGEMWKARVVHERHRRRHILLWAILITAILAYIGWALSRLHDQYLNPSTSFSLSNEVYRYPDFGVCLYQGNGCDSFDDHIAEGCVNSSNSTEFGLSTAEYRGKELSPTDGVWIPDTTEDAEERQSIDVDPRFTGPEKKYCVLFNMSAIEHTLGEERAQENYLDYTNLRMAWYPSGSKENDSNTCTTDLARREPHSTSVVIHLFDEVTDTIASGFQVAYSCRSNTSDTHTFTDIALALTETKRLDGTTERSYRADTIYSYPYVSDQVGENIPNITRPYAFLDLRIKQGPNSLETITEDAPSTIGELLGDIGGFWDILLLLWPIFFVVVSQQEPTLKPRDFRKS…	NA				NA				NA
Ec-13_001930	Esil-13_001930	M	CAGCTTTTCATTCCCCCCGCATTTTTCCTTTCAGGTGAAACTGGCCGGCACTGCGGGCGTGCGGGTGGAGGAGCTCACGCCCCACCGATCCGTCGTGAAAGTTGCCAACGCCCGACGAGTGCAGAACCACATCGGGAGCGTGCACGCGTGCGGCATGGCTCTCGCCGCGGAATCCGCCACGGGAATCCTGGTCGGCATGAGCGTGCCCGACAGCCGACTGCCCCTGTGCAAGAGCATGGCGATCGATTTCACAAGGCTGTCGCA	QLFIPPAFFLSGETGRHCGRAGGGAHAPPIRRESCQRPTSAEPHRERARVRHGSRRGIRHGNPGRHERARQPTAPVQEHGDRFHKAVA	NA				NA				NA				NA				NA
Ec-13_001980	Esil-13_001980	M	CAGGTTGAGGAGATGTACAGCCTCGATGAGTCCAACTTCAAGGATATTCGACCGGTGTATGGCCTTGTGTTCCTGTTCAAATGGACGGGAGATGACGAGCGACACACCACCGAATCACAAGACGAGCCCGGTCTTTTTTTTGCACGTCAGGTGGGTTTGGCGATCAGCAACAGTGAGACCATCCGGTCGGTGCACAACGGATTTTCTCGTCAAGAACCTTTTGTGACTGACGGAAAGGACGATGGGGGCGAGAACCAAGACGCGTTCCATTTCGTGGCTTTCGTTCCGTTTAACGGCAAGGTTTTTGAGCTGGATGGTCTGAAATCTGGGCCAGTGAATTTGGGCGACATCCCTGGGCAAAGTGGAAACCTCGCTAGCGCTTCTTGCTCTGGAATCCAC…	QVEEMYSLDESNFKDIRPVYGLVFLFKWTGDDERHTTESQDEPGLFFARQVGLAISNSETIRSVHNGFSRQEPFVTDGKDDGGENQDAFHFVAFVPFNGKVFELDGLKSGPVNLGDIPGQSGNLASASCSGIHGDDWLSVASPAIEERIARYSAGEIRFNLLAIVKNRRHVASEERQRCMRRVEALDRELSGRGGVQHPEAAALSALKQ	Efas-13_001980	M	ATGGAAGGAAAAACAACCGAATCAGCGCTTGGACAGGAAGTCTGTTTTTTTCTTGAGATAATGGTGCATCAACCTTCCGCTCAGGTTGAGGAGCTGTACAGCCTCGATGAGTCCAGCTTCTCGGATATTCAACCGGTGTATGGCCTTGTGTTCCTGTTCAAATGGACGGGAGAGGACGAGCGACACACCACCGAATCACACGAGCCTGGTCTTTTTTTTGCACGTCAGGTGATCCAAAACGCATGCGCTACCCAGGCAATACTCAGTGTGCTTCTCAACTGCGCAGACAAGATCGACATTGGCGAGACGCTGTCGGACTTCATGACTTTCACACGAGACTTCCCACCGGAGATGAAGGGTTTGGCCATCAGCAACAGTGAGAACATCCGGTCGGTGCAC…	MEGKTTESALGQEVCFFLEIMVHQPSAQVEELYSLDESSFSDIQPVYGLVFLFKWTGEDERHTTESHEPGLFFARQVIQNACATQAILSVLLNCADKIDIGETLSDFMTFTRDFPPEMKGLAISNSENIRSVHNGFSRQEPFVTDGKDDGGENQDAFHFVAFV	SL-13_001980m	M	CCACCTTTGTCCTCCCCCGTATTGCACGACGCGTGGAAAGGATTCCTGCGGGCTTCCTTTCTCTGGTTTTTAAGCAGTGTTGTTCACCCTCGGGGCGTCATGAGCGGCACCTGGTGCACCATCGAAAGCGACCCTGGCGTGTTTACAGAGCTCATTGAAAGCATCGGCGTCCAAGGAGTACAGATGGAGGAGCTTTACAGCCTCGACGAATCTAGCTTCTCTCGTCTTCGACCTGTCTACGGCCTGGTGTTTCTGTTCAAGTGGACTGGAGAGGATCAACGGGTCGCTGCCGAAGCTAGCAATGAAGAGGGCCTGTTCTTCGCGCGTCAGGTCATTCCAAACGCGTGTGCCACCCAAGCGATCCTCAGCGTCCTGCTCAACTGTGCGGACGAGGTTGAC…	PPLSSPVLHDAWKGFLRASFLWFLSSVVHPRGVMSGTWCTIESDPGVFTELIESIGVQGVQMEELYSLDESSFSRLRPVYGLVFLFKWTGEDQRVAAEASNEEGLFFARQVIPNACATQAILSVLLNCADEVDIGETLSDFLAFTRDFPPEMKGLAISNSETIRSVHNGFSRQEPFFDDGKSSRGKEEDAFHFVAYVPHHGKVFELDGLKSGPISLGDVPSRAGGADDVGSETVSHDWLSVASPAIEERISRYSSGEIRFNLMAIVKNRKQVATEARERCRQRAEALDQALSVQDDAESLDGDACSALEMLRIERESQRAVELRTVDECDFTITLEEAKFAQWRRISRD	SJ-13_001980f	F	ATGGAAGAGCTCTACAGTCTCGATGGCGCTAGCTTTGCTCGCCTTCAACCGGTATATGGCCTGGTGTTCCTGTTCAAGTGGACCGGAGAGAAGGATGACCGTACCACTTCGAACGCAAGCAGCCACCCCGAACTGTTTTTCGCTCATCAGCAACCGCTTCCCCCTGAATCGAATGCTCAGGGGTTGGCGATTAGCAACAGCGAGACGATTCGGTCGGTTCACAACGGATATTCCCGGCAAGAACCCTTCTTTATCGAGAGGGGGGGCTGTGGAGGCAAGAAGGACGACGCGTTTCACTTCGTGGCCTACGTCCCGCACGAGGGAAAGGTTTTCGAGCTAGACGGTCTTCAGTCCGGGCCGATTATTCTGGGAGATATTCCTGCCACCGATGATGTTGAC…	MEELYSLDGASFARLQPVYGLVFLFKWTGEKDDRTTSNASSHPELFFAHQQPLPPESNAQGLAISNSETIRSVHNGYSRQEPFFIERGGCGGKKDDAFHFVAYVPHEGKVFELDGLQSGPIILGDIPATDDVDERDIWLE	MP-13_001980f	F	TGCACGATTGAGTCGGACCCAGGCGTGTTCACGGAGCTCATCTCGGAGATCGGTGTCAAGGGCGTGCAGGTGGAGGAGCTCTGGGCCATTGACGAGGAGTCCCTTGCGCCCCTGCAGCCGATCTACGGCCTTGTGTTCCTCTTCAAGTGGAAGGGAGAGGCGGACAGGCGGCCGGTGCTGAGCGTCGAGGAGACGGGCGACAGGGATATCGGCCCAGAATTAACTCAATTTAAGCAATTCACTGCTGATTTCCCCCCTGAAATGAAGGGGTTAGCTATTTCTAACTCTGATTTGATTCGAAAAGTGCATAATTCTTTTCATCGACAAGAGGTTTTTGTTGCAGAAAAACCAAGAGAAGCAACAAAAGATGATGATGTTTATCATTTTGTGAGTTATTTG…	CTIESDPGVFTELISEIGVKGVQVEELWAIDEESLAPLQPIYGLVFLFKWKGEADRRPVLSVEETGDRDIGPELTQFKQFTADFPPEMKGLAISNSDLIRKVHNSFHRQEVFVAEKPREATKDDDVYHFVSYLEHQGVLYELDGLK	UP-13_001980f	F	AATAAAATACGTAACACAAGAAACTTTAGTCAGTTTAAGCAGCAAGTCCAACCAGCAAAAGGGGGAAGCGAAGAAATGTCCGGGTGGTGCACAATTGAGAGCGACCCTGGGGTGTTCTCTGAACTGCTAGAGAACCTGGGAGTGCAAGATGTGTACATGGACGAAGTCATCACCCTCGATGAGGAGGCCTTCGCCCAACTTAAGCCCATCCACGGGTTGGTGTTCCTCTTCAAGTGGCAAAAGGGGAAGACCATGGAAGACAAGAGCGGGGAGTTCCCCAACGTCTATTTTGCCAAACAGATCGTGAACAACGCCTGCGCCACCCAAGCCATCCTGAACATCGTCCTGAACAGCTCCTCCAAATTCGAAGTGGGCCCCACCATGAAGGAATTTCTCGAG…	NKIRNTRNFSQFKQQVQPAKGGSEEMSGWCTIESDPGVFSELLENLGVQDVYMDEVITLDEEAFAQLKPIHGLVFLFKWQKGKTMEDKSGEFPNVYFAKQIVNNACATQAILNIVLNSSSKFEVGPTMKEFLEMTENMTPEDRGSLMGDHETLREAHNQFARHQNFSFEERYASEDDDVYHFIAYLPKDGKVYELDGLQKGPVEVGEEGEDWVTTATAAIRKRLEDYPESSIGFSLLALCGDPTVEIEVQKQKAATADPALTVRAEDLKEKRKMWRTENQRRRHNYVPFLVHLLKALSKNGKLSPMVEKAIEKTKEDKAKEAEKKKEGKK
									SL-13_001980f	F	AGCGTTCAGCCTGGGCTTCCAGGTGCGAAGCCTCAACAGAGTATACACTGCTCTCCCATGGACGACACATGGTGCACTATTGAGAGTGATCCAGGGGTTTTTACAGAGCTGATACGAAATGTTGGAGTCGAGGGAGTCCAGGTGGAAGAGGTCTACTCTCTGGACGACGCCAGTTTTGCCCATCTCCATCCGGTATATGGGCTAGTGTTTCTCTTCAAGTGGACAGGGGAAAGCGATGACCGCCAGACCGTCGGTCCTGACTGCCACCCCGAACTGTTCTTCGCGCAGCAGGTGATCCCGAACGCATGTGCGACACAAGCGATCCTCAACATTCTCCTAAACTCTACAGACAAGGTTGAGGTCGGAGAGGCTCTTGCGGACTTCAAGACTTTCACGGCG…	SVQPGLPGAKPQQSIHCSPMDDTWCTIESDPGVFTELIRNVGVEGVQVEEVYSLDDASFAHLHPVYGLVFLFKWTGESDDRQTVGPDCHPELFFAQQVIPNACATQAILNILLNSTDKVEVGEALADFKTFTAGFSPDMKGLAIGNSETIRSVHNGFSRQEPFFSDDKDDRRENEDSFHFVAYVPHDGKVFELDGLRPGPIVLGDCPSRSDSRGNEGAWLEVASPAIEERIGRYSSGEIRFNLMAIVKNRKQVAMEGKEQCERRIVVIDQALADESDAMRWISNDASFLRAQGMDNLLSQKTRELQASERFDSTIADEEAKATLRRNENARRKHNYVPFAITILTMIANKGAMHALVKSAASKTDVPSSQMRE
Ec-13_001410	Esil-13_001410	A	ATGGGGCCTTGTGCAGCTGAGCCCGTCGCCCCGGGAGAGGAGCAGGTGGTCTTTTCACGCACGGCTGGAGTCGTGGCGAGCAAGGTCAGCTACATGGACGTCCTCGACCCTGCGAACGACTGGCAAGTGCTGGAGAACCCGCACGAGAACGACGCCGCTCCCCTAACCTGCCGGTTCAACCGCCGCGGGACCCACTTCGCTGTGGGCGATGAGGCCGGTCGAGTCGACCTCTGGAGCTTCGTGCCGATGCGGATCGCTGTTACCACCCCTGCCGCCGCCGTCGCCGTCGCCTCCGAGAAGTCAGGAGCGAGGGCGGGGGCCAAGGACAGGGAGGACGTGGACCACGGGTGGTCTACGACGAGCGTCGGTTGGTCAAGATGCTCGCGATACATGGTAGCG…	MGPCAAEPVAPGEEQVVFSRTAGVVASKVSYMDVLDPANDWQVLENPHENDAAPLTCRFNRRGTHFAVGDEAGRVDLWSFVPMRIAVTTPAAAVAVASEKSGARAGAKDREDVDHGWSTTSVGWSRCSRYMVAAYVQKRKTWPDGEEVILPGLVLLWDIVEEEVEGCLRLPSRIVHASLSPSNPRCGSVCCADGSSFLADFPSAATTATATATALATATNCGTQDDAAAPVQTPGVGSSFGEGEGEEQQQQQQQQQQEQDQKPQHVDKDDCISDARAKSPGAEGMAISGGAGVVSRAYGRAAVTVAGNGDMDENDDGAMDVDDGKEARGESEAGTNVSSNNASSTGSCCAEDTKSSSGGSAEVEAVPSAETGTATAAAASTVCERSATGGGGGSITGES…	Efas-13_001410	A	ATGCTTAATCAACCGTCTCGACCCAATCTCGGCGTTGCTGTTGCCGTCTGCGCTTCGTTTGCCCTTTTGAATACACCTAAGGTGAAGGGATTCCTGCGACTGCCTTCCCGCATCGTGCACGCCTCCCTCTCGCCGTCCAACCCTCGCTGTGGGAGCGTATGCTGCGCCGACGGAAATTCTTTTCTGGCCGAGTTTCCTTCTGCGGCCACTACAGCGACTGCGACGGTCACAGCCCTCGCCACGACTACAAACTGCGGCAACCTGCACGACACTGCGGCGCCAGTTCAAACCTTGGGGACGGGGTCGTCCCTTGGAGAGGGCGAAGGGGGTGAGCAGCAGCAGCAGGAGGAGGAGCAGAAGCCACAGCAGCTGGACAAAGATGGCTGTCTCAGCGATGCG…	MLNQPSRPNLGVAVAVCASFALLNTPKVKGFLRLPSRIVHASLSPSNPRCGSVCCADGNSFLAEFPSAATTATATVTALATTTNCGNLHDTAAPVQTLGTGSSLGEGEGGEQQQQEEEQKPQQLDKDGCLSDARVKSPWAERMTISGGTGDVSLANSRAAVAVAASGDRNENGDGAMGVDDGKEAVRGWEQERRLLGTCRSCTTGATLSAAWLFSATTTATAAGASTACEPSATSGSRSIVAGKSEDGGGEGKVDTDAVREEAYVSSSSLSPPPSPSCAGGVTVSSVSGGTSSGSSVNRAVNRGPMQAGRVAWCDDGETFFLLNHEGRPGVLKTDFPGPWYPSGYVLIDNNVGEDVPESKKTLMSLLHLRYGSTAGAGPLVTDTGAGAAAHTLIAPPDD…	SL-13_001410m	M	AGCGGACGAGCAAGAGCGTTGCGTGCAGTCTTGCAGTCTTCAAGTCACATAGTCGTTGATACGACCAGCCTTCATTGTCGCGGGAGCATCGTACGTGGTGAATCGGAGATGGCGACTTCCCTTGTTGAGCACGTTGCTCCCGGGGAGGAACAGGTGGTATTTTCTCGCACTGCTGGAGTCGTGGCAAGCAAGGTCAGCCACATGGAAATCCTCGACCCTTCCAACGACTGGAAAGTACTGGAGAGTCCGCACGAAGACGATGCCCCCCCACTCACCTGCCAGTTCAACCACCGTGGGACGCATTTTGCGGTCGGGGACGAGTCCGGTCGGATCGATCTTTGGAGCTTCGTGCCCCTACGATTGTACGTTAAGTCGCTCGACCTCTCCTCTACTGTGCTC…	SGRARALRAVLQSSSHIVVDTTSLHCRGSIVRGESEMATSLVEHVAPGEEQVVFSRTAGVVASKVSHMEILDPSNDWKVLESPHEDDAPPLTCQFNHRGTHFAVGDESGRIDLWSFVPLRLYVKSLDLSSTVLEGLLPPGPFVNNSSGKSSVVVEGEVGGAPANEENEVERRDAEHGWSMASVAWSRCSRYIIAAYAQRKKTWPDRTSAQLPGLVTFWNIVAGQVEGYLRLQSRVVHVSLSPRNPRRGSVCCIDGTSFVADFAATTLSDIPARGIETWFFPGGGKQERDCTLEGSCGSDVGVMSSRAILRERALGGRPATGGHKKCVHGMNALDMEEAYTCDISTNEDGDGTVGNSSPQDGCVPAVPAAKKPSNKNAGVAKVYQIWDPVRQTELFSASF…	SJ21771 _SJ04462	M	ATGAGATCTGCCATCTCAGTCCTGCTCTCGTCGACAGTGGTGTTAACTGTCAGCACTGCCGTTGTCGCGCCTCCCCCCCGCCCGCTCCTCGCCCCCCCACACGAAGACGAAGCTCCCCCGCTTGCGTGCCAATTCAACTACCGGGGCACGTACTTCATGGTTGGAGACGAAGCGGGCCGTATCGACCTATGGAGCTTGGTGCCTCTCCGATTATACGTCAAGTCCCTTGATCTCACGCGCGACCTTCTCGACACACTAATTCCCCCGCCCCCGTTCACTGAAAGTGCCAACGGGAATTGGACGTCTGACGGCAACGGCACGGAGAAGGAGAAGAAAAACGAAAAAGACGGCCAGGAGCACGGGTGGTCTACCGCTAGCGTTCAATGGTCCAGGTGTTCG…	MRSAISVLLSSTVVLTVSTAVVAPPPRPLLAPPHEDEAPPLACQFNYRGTYFMVGDEAGRIDLWSLVPLRLYVKSLDLTRDLLDTLIPPPPFTESANGNWTSDGNGTEKEKKNEKDGQEHGWSTASVQWSRCSKFIVAAYIQKRKTWPDGEEVLLPGMVLLWNVVDSQVQGYLRLPSRVAHVSISPVDPRRGSVCCVDGTSFLVDFPAVAPHSPPVSANCGSGGHGADIPPVSASVGAETSLAGGGGGGQQQQPPPQKNKQQNEQMRHMSGVEQLTLSMGHGVGVGNEQTEDEQGSYRCNGFRGHGVIVNSVATATEVTETTADDLLPFNGSGDGRSRNSDDYEMRIDIQEEGAVVAAAPGVGGNLKVSASPRADGCGIGGARAGTSKTEADMLVEHGT…	MP-13_001410m	M	AGGCGGCTCTCGCGTGGACAGTGTTCCTGCCTTCTTGCGCGGGCGGCGTACATGACCACCCCCTCTTCAATCGCTGGCATGGAATATACGGCCCCTGGGGAAGAACAAGTCGTCTTCTCGCGTAAGGCGGGGGTCGTCGCAAGCAAGATCAGCTACGTTGACATTCTTGACTCTGCCAATGACTGGCAAGTCCTCGAGAGTCCGCACGAAGACGAAGCCGCCCCGCTCGCGTGCCAATTCAACTACCGGGGCACATACTTCATGGTTGGAGACGAGGCGGGCCGTATTGACCTATGGAGCTTGGTGCCCCTTCGACTATACGTCAAATCGCTTGACCTCACGCGCGACCTCCTCGACACTCTAATCCCCCCGCCCCCTTTCACTGAAAACGCAAACGGG…	RRLSRGQCSCLLARAAYMTTPSSIAGMEYTAPGEEQVVFSRKAGVVASKISYVDILDSANDWQVLESPHEDEAAPLACQFNYRGTYFMVGDEAGRIDLWSLVPLRLYVKSLDLTRDLLDTLIPPPPFTENANGKSPSDGNDMGKATKNERDSQEHGWSIASVQWSRCSKFILAAYIQKRKTWPDGKEVLLPGMLLLWSTVEAEHEDEAAPLACQFNYRGTYFMVGDEAFASGNLLKIKASANGDLSLLAKADLHGGASPATLQLTTEGDKVLVATATKGLCLVPTDDLDLSRAEMFGETFGMRGSKTRFWGPAILADVHGSGSDSAGIRRQTVVGNPSRSRDEKTALFFFDPIGGQPERVDTPRREGVISLAGSPLRPLLVLLCPTGEVYLREQVLKTD…	UP-13_001410m	M	TCAAAGTTCGACCTCCGAAAGTCGCGCGGGATAGCTGGCACCAGGTGCCTTCAGATCTTGAATCAGAGCTCTTGCCATCTTCTGTTGACGGCGTACATGACCACCACCCTTGGTCCACTCTCTGGGATGGAACACTCGGCTCCTGGGGAGGAGCAGGTCGTCTTCTCACGCAAGGCGGGGGTTGTCGCGAGCAAGATTAGCTACGTCGACGTTCTTGACTCAGCGAATGACTGGCAAATCCTCGAGAGTCCGCATGAAGACGAAGCCCCCCCTCTCGCCTGCCAGTTCAACTACCGGGGCACATACTTCATGGTTGGAGACGAAGGGGGGCGTATCGACCTCTGGAGCTTGGTGCCCCTCCGACTTTATGTCAAGTCGCTTGATGTCACGCACGACCTC…	SKFDLRKSRGIAGTRCLQILNQSSCHLLLTAYMTTTLGPLSGMEHSAPGEEQVVFSRKAGVVASKISYVDVLDSANDWQILESPHEDEAPPLACQFNYRGTYFMVGDEGGRIDLWSLVPLRLYVKSLDVTHDLLDTLTPPAPFTESANGNSSGGVNGTGKGKEKERNGQEHGWSTASAHWSRCSRFIVAAYIQKRKTWPSGEEVRLPGLVLLWNIVEAQVQGYLRLRSRVAHVSLSPMDPRRGSVCCVDGTSFIVDFPSVVAVSTPVAQLHGSAEYAAADAAKRSGNGAESGGAAGVSPFPPSVAQVETKTPGPGRGDHWQQQPQQHSGRKGNIPGIHQLPLFEGGAVEVSGREKPYSERGSDKWNELLGDRAIGDAVETAWGLDEIGARDGRIKSKDI…
									SL-13_001410f	F	GACCCTACCAACGACTGGCAGCACGAAGACGAGGCCTCTCCACTGACCTGTCAGTTCAATTACCGCGGGACGCATTTGGCGGTAGGGGACGAGTCCGGGCGCATCGATCTGTGGAGCTTTGTACCACTCCGACTGTATGTCAAGTCGCTCGAACTCACCCGAGAGCTTGTAGACAAGCTGCGTGCCCCTACCTCGCTTGCCGAAAGGGCCACTGGCAACTTCTCTGGGGCAGTTGGGGAGGAGGGCGGAGTAAGGACGAACGAAGAGAAGGAGCTCCGAAGGGAGAGCACGGACCTCGGGTGGACGACGGCGAGTGTTGACTGGTCCAGGTGTTCACGGTACATTTTGGCCGCCTATGTGCAAAAGAGAAAGAATTGGCCGAACGGGGAGGCGATTCGA…	DPTNDWQHEDEASPLTCQFNYRGTHLAVGDESGRIDLWSFVPLRLYVKSLELTRELVDKLRAPTSLAERATGNFSGAVGEEGGVRTNEEKELRRESTDLGWTTASVDWSRCSRYILAAYVQKRKNWPNGEAIRVPGLVAYWNVVEGQVEGYLRLESRVMHVSLSPRNPRRGSVCCENGTSFVADFPAPAKAAVASSTLQEAVPIEEVRCHSVINNVEERFEEKEPCARDTEVVSSDTVLRDGKRPVRSSADSRLESARDGGGPADVEEPGGDGSGANKHTTYGCRNVSSDCVLSAPAVTLQSTEKPKLSSAILATSRKIWDPVIHTELFQAPMVAAGSMALCADPGTGGSEGGMRFNVDADAGLGTIEETSAGDDGVSTGIGAWRSGNVASAGSACGVS…	SJ-13_001410f	F	ATGAATTCGCGCAGTTTTGGGATGCGAGGGAGCAAGACCCGTTTTTGGGGAGCGGCGGTACTAGGGGACGTGCACGGTAGCGGGGCCGACGGCTCCGGCAAGCGGAGCTTGACAATCATTGGGAACCCTTCTCGGTCTCGTGATGAAAAGACGGATCTGTTCTTCTTTGATCCCAATGGAGGGCAGCCGGAACGCGTGGACACGCCCCGGAGAGAGGGTGTGATTTGTCTGGCATGCTCGTCGCTTCGACCCCTGCTGGTGTTTATTTGCCCAACGGGGGAGCTGTATTTCAGGGAAGAGCGATTTCGAGCTGCGACTGCGTCGGAGGCGGATGCCGCGGTGAAGCGCAGAAAAATGGTGCCGAAGATGATGGAGATTCTGGCTGCGAAAAAGAAGAAA…	MNSRSFGMRGSKTRFWGAAVLGDVHGSGADGSGKRSLTIIGNPSRSRDEKTDLFFFDPNGGQPERVDTPRREGVICLACSSLRPLLVFICPTGELYFREERFRAATASEADAAVKRRKMVPKMMEILAAKKKKYDEEVFKRKRKLQEANANATATGQGAADDAAADVYGVVVNGKDTARELRPLLAKRGGGGASKRRDVAACDSLPFGSAGSAGGNLDPHGYHLSAAPAHDVGAPEYTPCFGSMSLVGPDVWCPPGGGNGTGVGSLALTGGATAYFTPWVPGASGGVSPFGGNASDCQRIPGEHGVCGVLDSGGLKHEPHSSLFPTDSPTDSRGGDYESLDVGSGRQVAPSRAMHAVGSALSSFSPLSSSDRRILSSGASCSTPLSRESSHRHYCSSQS…	MP-13_001410f	F	GGGTGGTCTACCCCGAGCGTTTCCTGGTCCAGGTGCTCGAGGTATATTGTGGCGGCGTACATTCAGAAAAAGAAGACCTGGCCCGATGGGGAGGAGGTGCAACTGCCCGGTATGGTACTCTTGTGGAACGTTGTGGAGGCGCAGGTCCAAGGGTACCTGCGACTCCGTTCTCGGGTCGCCCATGTGTCGCTGTCCCCGATGGACCCTCGAAGGGGAAGCGCATGCTGCGTGGACGGGACGTCCTTCCTGTTCGACTTCCCCCCCGTCGTACCGCTCTCCCTGTCGAAGAAGGAGTGTCATGGAGGCGCCGAAATCGCCCCTGTCGACGCTGCGAAGTCCTCCGCGCCTATGGGCGCTGTAGGCGTTGGCGCTGGTTGTGCAAAAGTTTCAATTTCGGCA…	GWSTPSVSWSRCSRYIVAAYIQKKKTWPDGEEVQLPGMVLLWNVVEAQVQGYLRLRSRVAHVSLSPMDPRRGSACCVDGTSFLFDFPPVVPLSLSKKECHGGAEIAPVDAAKSSAPMGAVGVGAGCAKVSISATSSEMRTPFVGGEQQWQQQPIRGHAQPQQSNQLHGQRTREGLVYDVQVKSPLARASWLASASSTTWRGEEDSGRVSGSSSDVDMHSPMNAQRARTIKIWDPVQQLQLFSPATSTASGKCSGTGEKTVIEPTAGTTGVEIAFPPGSASGSVSGGGGSGSGSKPQSRIPVQPGRAAWCEDGETFFLLNHEGSLVKIKASANGALSLLAVANLHGGASPATLQLTPEGDKLLVATATKGLCLVPSNDLDMSRAEMFGETXXXXEGLKRQ…	UP-13_001410f	F	TCGCCACGAAGAATACGTCACGTCCAAAATCGCCACACCGAACCCCTGAGAGGAACTGTACGAATTTTCTGGAAGCAAGGTTGTTTCTGCTGTTTTTCATGGACAGCGTACATGGCCGCCACCGCCGCTCCAACCGACCACGTGGAACATACGGCTCCAGGGGAGGAGCAGGTCGTCTTCTCGCGGAAAGCAGGGGTTGTCGCGAGCAAGATCAGCTATGTTGGTGTTCTTGACTCTGCAAACGATTGGCAAGTTCTCGAAAGTCCGCATGAAGACGAAGCCCCTGCGCTCGCGTGCCAATTCAATCACCTGGGCACGCACTTGATGGTCGGGGACGAAGGGGGACGTATCGACCTCTGGAGCTTGGTACCTCTCCGACTCTACGTCAAGTCGCTCGAT…	SPRRIRHVQNRHTEPLRGTVRIFWKQGCFCCFSWTAYMAATAAPTDHVEHTAPGEEQVVFSRKAGVVASKISYVGVLDSANDWQVLESPHEDEAPALACQFNHLGTHLMVGDEGGRIDLWSLVPLRLYVKSLDLTSGLLDTLLPPAPFTENANGSSPPDIGSGKEKRRHRQEHGWSTPSVCWSRCSRYIVAAYVQKKRTWPDGEEVLLPGMVLLWDVMEAQVQGYLRLRSRVAHVSLSPMDPRRGSVCCVDGTSFLFDFPPVVPRFLSKELRFHRGAKISTVDASKLCASTGSLSNDDGYGTVAFSAASAETRISFVGGQQREQQLRGQRAGEEGLVYGVQMRLAATPTSWLRTKPSATWQGKEYALKRGRNQEQEEDNTSLGSVDAIDIGMGTEERVA…
Ec-13_002450	Esil-13_002450	A	ATGCCTGTGCTATGGACGACGACGACCCCCGCCACTGCTGCGCCAGCGGCAGGGGAGCAAAGAAGAAAGATGACGATTATCACCGATGCAAGGACGCCCGCAGCAGCAGCAGCAGCAGTACCATTAGCGGCGGCAGCGGCGGCGGTAGCAGCAGGACGAGAAGGGCCGCAGAGGAGGAGTAGTGGTGGGAGGAGCTCATGCCGCGGCAAGCGGCGTCCGGCGAGCAGTACGGCGGCGCCAGCGGCGCTGCTGCTGTTGTTTGCCGCGGCCGCCGTAGTCTCCACCTGCTGCTGCGTTGGCGTGGCGGAGGCACCTTTGGGGCTACTGACATCGCCTTTTCCCACCACTTCCGCTGGGCCGGGGAGAGGATGCGGGGCTTTCATCCCCGCCGCAGCAGCC…	MPVLWTTTTPATAAPAAGEQRRKMTIITDARTPAAAAAAVPLAAAAAAVAAGREGPQRRSSGGRSSCRGKRRPASSTAAPAALLLLFAAAAVVSTCCCVGVAEAPLGLLTSPFPTTSAGPGRGCGAFIPAAAAKTPLIWPQQRQYARQQAVFGTGRRVVSERGHGATAAAGVFSREKKSASAALSMAVMKLVASCGIGYYFSKKGILDQSAITSLSKLIFFVFQPCLLFVNVASTLGTPGQKLSKLLVLPVFAVLQILFGSAVGKAMEKILGLKEGSPEARELRTCTSFANSGPLPLLFVDSIFGAHPDASIVSSAVAYISFYLLGWSPMFWTAGYTMVAGKPQPAAPVSDADEQHFETLSPLRKLVVVCHRLKASPTFKRIASPPVMGCIAGMFAGLL…	Efas-13_002450	A	AGGCCTCTGGGGCTACTGACGCCATCGCCTTTTCCAACCACTTCCGCTGGGCCGGGGGGGAGGGGATGCGGGGCTTTCGTCCCCGCCGCAGCAACCAGGACGCCGCTCTTACGGCCACGGCAGCAGCAGCAGCAGCAACAGCAGCAGCAGTTCGCACGGCAACAAACGGTTTTCGGTGTGGGGAGGCGTGTTGGTGGTGACCGGGGGGGGCACGGGGCGACGGCGACGGCACCAGGCGTCTTCTCAAGAGAGAAGAAGAAGAGAACTTCGGCGGCGTTGTCGATGGTGGCGGGGGCGGGGGCGGGGAGGGGATCCGCGGTTGCGGGAGGGGGGGGTACCGGTGGCGGCGGCGGCGGGGCCGCGGGCGCGATTAAGGCGGGCGTGCTTGCCGTGGGGTCG…	RPLGLLTPSPFPTTSAGPGGRGCGAFVPAAATRTPLLRPRQQQQQQQQQQFARQQTVFGVGRRVGGDRGGHGATATAPGVFSREKKKRTSAALSMVAGAGAGRGSAVAGGGGTGGGGGGAAGAIKAGVLAVGSVLMSVQPAILVGGDEARGLLRDRVLLQQEGYPRSAERHHFPVEADLLRLPAVPAVRQRGLHPRHPRSEAVQAARAAGLRGPPDRLRIRRRK	SL-13_002450	A	GTTTTGGTTTTCGTTGGAGCTGGCGCGCTCAAGGCGGGAGCGCTGGCGGTGGCGTCCGTCGTGATGTCCGTGCAGCCGGCGATCCTAGTGCTCGCGACCAAGGCGGTGATGAAGCTCGTGGCCTCGTGCGGGATCGGCTTCTACTTCAGCAAGAAGGGAATTCTCGACCAGACCGCCATCACTTCCCTGTCCAAGCTCATCTTCTACGTGTTCCAGCCCTGCCTCCTGTTCGTCAACGTCGCCTCCACGCTTGGGACTCCCGGCCAGAAGCTTTCCAAGCTGCTGGTGCTGCCAGCGTTTGCGGTGCTCCAGATTCTCTTCGGCTCCGCCGTGGGCAAGGGCATGGAGAAGCTCCTCGGCCTTAAGGGGGGTTCTCCCGAGGCGCGGGAGCTCCGCATG…	VLVFVGAGALKAGALAVASVVMSVQPAILVLATKAVMKLVASCGIGFYFSKKGILDQTAITSLSKLIFYVFQPCLLFVNVASTLGTPGQKLSKLLVLPAFAVLQILFGSAVGKGMEKLLGLKGGSPEARELRMCTSFANSGPLPLLFVDSIFGAHPDASIVSSAVAYISFYLLGWSPMFWTAGYTMVAGKPQPSAPISAADAEHFEKLSPLRKVVVMGHRLKASPTFKRIASPPVMGCIAGMIAGLLPVGRSLLLGRSAPLSPLFDALKGLGNAYLPAAILVLAGSLARPAAVPPPAPAAGGEVVEGASSSSPSYPAETKRAFYKKIAAIMASRFLVMPLVAAMLLLSGAKAKVIPYDKLVWFVLLMEGCMPSAQNSVVILQMEKKPELASSMAKTLTV…	SJ00352	M	ATGGCGGCGGGCAGCGGGGGAGCGGGGGTCGGGGCGGGGGCGGGGGCGGGGGCGGGAGCGGAGGGGTTGCTTGGCGGGAGGTTGAGGGTGAGCCGGAACGCTGCTCGTGCGGCGGCCCTGGCGGCGTGCTCGATGGTTGGCTCTGTGCAGCCATCCATACTCATCCTCGCCACAAAGGCGGTGATGAAGCTGGTGGCCTCGTGCGCTATCGGGTACGGCTTCAGCAAGAAGGGCATTCTAGACCAGAGCGCCATCAGTTCTTTGTCTAGGCTCATATTTTTCGTGTTTCAGCCCTGCCTGCTTTTCGTCAACGTGGCCTCCACGCTGGGAACTCCCGGGCAAAGCCTGTCGAAGCTGCTGGTGCTCCCGGTGTTTGCAATGTTCCAGATATTCTTCGGC…	MAAGSGGAGVGAGAGAGAGAEGLLGGRLRVSRNAARAAALAACSMVGSVQPSILILATKAVMKLVASCAIGYGFSKKGILDQSAISSLSRLIFFVFQPCLLFVNVASTLGTPGQSLSKLLVLPVFAMFQIFFGSIVGRGMEKLLRLPEGSPAARELRMCTSFANSGPLPLLFVDSIFGAHPDGAIVSNAVAYISFYLLGWSPMFWTAGYTMVAGKPQAAVPMSEADAESFKQLSPLRQVVAKCLRAKDDPTFKRIVSPPVLG	MP-13_002450	A	GGAGAGAGGTTGAGGGTGGGCCGGAACGCGGCTCGGGCTGCGGCTCTGGCGGTGTGCTCGATGTTGAGCTCTGTCCAGCCGTCTATACTCATCCTCGCCACGAAGGCGGTGATGAAACTGGTGGCCTCGTGCGCTATCGGGTACGGCTTCAGCAAGAAGGGAGTCCTGGACCAGAGCGCCATCAGTTCTTTGTCGAGGCTCATCTTCTTCGTGTTCCAGCCCTGCCTGCTCTTCGTCAACGTGGCCTCCACGCTGGGAACTCCCGGGCAGAGCCTGTCAAAGCTGCTCGTCCTGCCGGTGTTCGCTATTTTCCAAATATTCTTCGGCTCCTTCATAGGACGGGGGATGGAAAAATTGCTCCGCCTCCCCGAAGGGTCTCCGGCGGCCCGAGAGCTCCGG…	GERLRVGRNAARAAALAVCSMLSSVQPSILILATKAVMKLVASCAIGYGFSKKGVLDQSAISSLSRLIFFVFQPCLLFVNVASTLGTPGQSLSKLLVLPVFAIFQIFFGSFIGRGMEKLLRLPEGSPAARELRMCTSFANSGPLPLLFVDSIFGSLPDGAIVSSAVAYISFYLLGWSPMFWTAGYTMVAGKPQAAIRMSEADAERFKKLSPLRQVVAKCLRAKDDPTFKRIASPPVLGCIAGMIVGLLPWGRTLLLGRSAPLSPLFDAIKSLGNAYLPAAILVLAGSLARPASAKPDAAAAATGSAPAPASAVAAAATAAATTAATATATATATATATNTATGAATDAASMTESKLDFYKKIAAIMASRFLFMPVVAAGMLLTGSRLKLIPSDKLIWFV…	UP-13_002450	A	GGGGCGGAGGCGGAGGCGGGAGCGGGGGGGTTAATGGTTGTGAGGGTTAGCTTAAACAGTGCTAGAGCCGCGACTCTAGCAGTGTGCTCGCTCTTGGGGTCTGTGCAGCCGTCCATACTCATCCTCGCCACAAAGGCCGTGATCAAGCTCGTAGCGTCTTGCGCTATCGGGTACGGCTTCAGCAAGAAGGGCATTCTTGACCAGACCGCTATCAGTTCTCTGTCGAAATTGATCTTCTACGTGTTCCAGCCCTGCCTTCTCTTCGTCAATGTGGCCTCCACGTTGGGAACTCCAGGAGAGAGTTTTTCTAAGCTGCTCGTGTTACCGGTCTTCGCGATATTCCAGATATTCTTCGGCTCTATAGTGGGAAGGGGCATGGAAAAAATGCTCCGTCTACCG…	GAEAEAGAGGLMVVRVSLNSARAATLAVCSLLGSVQPSILILATKAVIKLVASCAIGYGFSKKGILDQTAISSLSKLIFYVFQPCLLFVNVASTLGTPGESFSKLLVLPVFAIFQIFFGSIVGRGMEKMLRLPEGSPAARELRMCTSFANSGPLPLLFVDSIFGAHPDVTIVSSAVAYISFYLLGWSPMFWTAGYTMVAGKPQAAVPMSAAEAERLKLLGPLRQVVARCVRAKGDPTFKRIISPPVMGCIAGMIVGLLPWGRALLLGRSAPLFPLFDALKSLGNAYLPAAILVLAGSLARPASTKPAPPATTTIDKATVPGVPVIGGGSGGVATFTAATAVAATATAADSPTETKAAFYKKIVAIMASRFLVMPVVAAGMLLSGSRMKVIPTDKLIWFV…
Ec-sdr_f_000050	Esil-f_000050	F	GTGGGAGACATCGAACTTGGTGAGTTGCTATGTGACAGCCTTGAGGATGCTGCGGACTCTAGTCTGCTGCGATTCACGATCAGTTCTACCGAGACCTGGCTGGGAGAAGTCGTCGACCCCGAACCCTCCGCCAATTCCATCCCCAGGACTGTCAGTATGACGTGGACCGACCCATGCGACATTGAGAGCTTCCTCCTGAAGCTGGTGTCACGAAACGCAGACGGCAGCACCTCTATCGTCACATCCGTACCATGCTCCGCTGGATCCAGCAACGAACTTTGCATGGTGGAGCTCGAAATGTTTTTTCACGACGAAAGTGAGGCTGTGGACACCATAGAATCCTCTTCGTCAAGCTCCAGTTCGAAGGACCAGGGCTCTCGGATGCTGAAGGAACGACGT…	VGDIELGELLCDSLEDAADSSLLRFTISSTETWLGEVVDPEPSANSIPRTVSMTWTDPCDIESFLLKLVSRNADGSTSIVTSVPCSAGSSNELCMVELEMFFHDESEAVDTIESSSSSSSSKDQGSRMLKERRVSTTYMEEESLRSQGIPSDRSLQATTVIDVLIVYSPEAAYARGIAEAQLLTRIVEGMVTLNQAITNSGIAGLEYRLVQVAELPYSQMTYIPSDDIDLKPELDALAANSNVTDLRDQYQGDLVQLVGYFPGTCGLGYVFNGDDGSGFSLVDSNCFDNFSHTHEIAHNMGCYHDKDNSNTQHAYRHGWRYCEGTDP	NA				NA				NA				NA				NA
Ec-sdr_f_000100	Esil-f_000100	F	ATGCACCACCGCGGGCCGTCTGGTCAAACAGCGCTTCACTTTGCAGCATGTGGTGGCGGAGCGCTTGTTGCCAGGACCCTTGTTGCTGCCGGAGCTGACCCGGCAGCGCTTGACGATGCTGGGAACACCCCGGTGGATGTCGCCAGAAAATGCAGTGGAAGGGCAACGCTGGACGTGCTTACTCTACATCGTGAACATATGACGCCAGCCTCCGTCCTTGTCGCATATATTGCAGAGGACGAGGTCGGGACCAGCTCTTGGGTGAGAACTCCTCGCACTGGCGGTGGCTTGAGAAGACCATCGCGTGTCGGCTATCAGGCTAGCACTAGGGAGGCTTCCCAGATGGTGGACATCTAG	MHHRGPSGQTALHFAACGGGALVARTLVAAGADPAALDDAGNTPVDVARKCSGRATLDVLTLHREHMTPASVLVAYIAEDEVGTSSWVRTPRTGGGLRRPSRVGYQASTREASQMVDI	Efas-f_000100	F	GACGAGATCGGGACCAGCTCTTGGGTGAGAAGGTCTGGCACTGGCGGTGGCTTGAGAAGACCATCGCGTGCCGACTATCAGGCTAGCACTACGGAGGCTTCCCAGAGGGTGGACGTGTAG	DEIGTSSWVRRSGTGGGLRRPSRADYQASTTEASQRVDV	NA				NA				NA				NA
Ec-sdr_f_000120	Esil-f_000120	F	ATGGGAGCTGCGCTGGCGAAGGCATTGTCCCTTCAGGTGGAAGTCAGGGAATTGTCTCACCCTTCTGCAAACGTGATCAGGTGCGGGTACCATGCGATGCCATCGCAAGAGCCGTTGCATTTGCACGTCGTCAGCATGGACCTCGACGGGACGGGCCTGAAGCGCAAGACACACTGGAACAGCTTCACGACAGAGAGGCGGCTGGAGGAGCGGGGAAGCCTCGGTCTCGACATGCGAACATTCAGGGAACTCGAGCATGTGAAGTTG	MGAALAKALSLQVEVRELSHPSANVIRCGYHAMPSQEPLHLHVVSMDLDGTGLKRKTHWNSFTTERRLEERGSLGLDMRTFRELEHVKL	NA				NA				NA				NA				NA
Ec-sdr_f_000140	Esil-f_000140	F	TGTACCAACGCAAGTACGACGTCGTATCACACGCCCCCACAGGTATTCGGCTTTGTTCCTTGCTTGCTAATCGACGAGAAGCGGAAGGACGTCGCAAGATTCGATCTTGGGTGTTGCTGGAAGGAAACTACCCAGCCAGAGAGAATCATCAGCGGACCGCCAAGAGTTCGTAGCCGGCGTGATTCCTTTGTGCTTGAGCAACTCTCCGACACGGATCACCCAGCTGCCATTGCCGACGAAACCTGGAATGACACCGGTGATGAGGCTCGCTGCCCACCTTGTTCCCCAGCGGCTGCCTTAGTGGGAAAAACTGTTCCAACCCAGCCGTCATCGTCTTGCAGGTATGGCACAAGTCATGAAACGGGCGAACTATCCCGTCCCTTCCCGCGTTCCCCACCC…	CTNASTTSYHTPPQVFGFVPCLLIDEKRKDVARFDLGCCWKETTQPERIISGPPRVRSRRDSFVLEQLSDTDHPAAIADETWNDTGDEARCPPCSPAAALVGKTVPTQPSSSCRYGTSHETGELSRPFPRSPPRVRNGGSERGAGRNNGQDCHQTKRPDVHQPRSRHEANNDIITAVTKREASAGGLRVSALIQEKPWKNMTPACFEAVEAPRNPRGWGRGQGETGGSEPSCWGGVVQGYCNWLLDRNSAXGSPGYDINVFFRRSSYLRDFVTTARRHGMLLGESSLPVAAYIRGVDLSEVATQQAILDLEIALVSSSQSTIASTTSIDQDAVVSGNATSSWLRGFINWLPSSSYASSSEEYTSANEQGLWVGSADLFHEAVNDFLAEPEYQRFEDDFS…	Efas-f_000140	F	TGTTCTTTCGTCGACAACACGCCCCCACAGGTGTTCGGCTTTGTCCCTTACTTGCTTATCGACGAGAAGAGGAAGGACGTCGCAAGATTCGACCTTGGGTGTTGCTGGAAGTGGAAGGAAACTACCCAGCCAGAGAGAATCATCAGCGGACCGCCAAGAGTTCGTAGCCGGCGTGATTCCTTTGTGCTTGAGCAACTCTCCGACACGGATCACCCAGCTTCCGCCAGCGACGAGGCTCCCAATGTGGACGAAACCTGGGATGACACTGGTGATGAGGCCCGCAGCCCTCCTTGTTCCCCAGCCGCTGCCTTCGTGGGAACAACTGTTCCACCCCAGACGTCATCGTCTTGCAGGTATGTCGCAAGTCATGCAACGGGCGAGCCATCCCTTCCCTTCCCA…	CSFVDNTPPQVFGFVPYLLIDEKRKDVARFDLGCCWKWKETTQPERIISGPPRVRSRRDSFVLEQLSDTDHPASASDEAPNVDETWDDTGDEARSPPCSPAAAFVGTTVPPQTSSSCRYVASHATGEPSLPFPRSPPRVRNDGSERG	SL-f_000140	F	ATGAATGCCAAATTTGAAGTTGATGTAGCATCGAAAGATGTGTCCGATGATACGCTCAAACATCTTGCAATGCATCTCTTATCCACCTTTCCAGAAACCAAACAAGATATCCAGAAACGGGAAAGAGCGCAAGTGGAAGGAAGTATCGACGAACGGCCGCGAGTTCCACTTCGACGCGATTCCTTCGTGATCGAGTCTCTTTCGGCGTTGAATTACCCGCCTCATGCCGGCCGAGGCGCTGACCTCATGGAAGAAGTTTGGAATGATAGTGGTGACGAACGGGCACAATACCGTCCATCTCCACATCCATCTTGCACCAATGGATTGGTGGAGAGGCAGAGGTTACCTTGCGCTTCACCACCATCGAGCCCGTCTGCAAGTAATGTTACTTTAACACCA…	MNAKFEVDVASKDVSDDTLKHLAMHLLSTFPETKQDIQKRERAQVEGSIDERPRVPLRRDSFVIESLSALNYPPHAGRGADLMEEVWNDSGDERAQYRPSPHPSCTNGLVERQRLPCASPPSSPSASNVTLTPKLRWSEEQAQQKTGHDLPSAKSSKRTPDGCHHQRRRGQRQSNEGLESADTHADYIESNPWWCHRLIPQGPSKSSQPLSSDPSPSHLEIRSGTQPSLGGYREIAMKNGIKTSSTTRRLKLLKVAGGYVGQAGEGESGIEECCSLQPIIQGYCNWLLDGFGARWGVLAFFGVGLATASAIGVKHATLGYNANDFYPPSSYLYEFVTIARQQGLLFGESSVPVAAYVQGVDLSSSATQQAILGLEIALVASSPSTISSTSSVSRGDIMF…	NA				NA				NA
Ec-sdr_f_000160	Esil-f_000160	F	ATGCTGATGGGTGCGACAAAAATGGACTTTAGtttttttCAACGGAGTCATGCCAGCACAGCGNNGCAGGATACTCTACAACTGGAGGAAGCTTTGTCATTGGCAGCGTTGACACGCCGAAGCCTTCGCCATTTGAATGAGTCTTTGACGACGGCAGAATTCGGTGAACATGGAGCGCTACACTGCGTGAATTCGCGCAGAAGAACCAGTGAAATAAAGGCTGACTTCGAAATGGGTGAAATAGCTGCTGCTGGCAAGGACATGGATGGTGGCGGTTTGGAACTGATGGTGCAACAACGACCGCCGGATCATCATGCTCGTACACGTAATACCCCAACAATGGACGACGTTGCGGTGCGATCCTTGGGCCAGATTCGGCAGAAGGGAGCGCGTAGAGTT…	MLMGATKMDFSFFQRSHASTAXQDTLQLEEALSLAALTRRSLRHLNESLTTAEFGEHGALHCVNSRRRTSEIKADFEMGEIAAAGKDMDGGGLELMVQQRPPDHHARTRNTPTMDDVAVRSLGQIRQKGARRVHRELNVVRAGFRELLGLAQARAAKVAERMMTRSARTCIAAQRRAMQVRAAVLA	Efas-f_000160	F	ATGCTGATGGGTGCGACAAAAATGGAGTTTAGTTTTCTTCAACGGAGCCATGCCAACACTGCGCAGGATACTCTACGACTCGAGGAAGCGACAGCGTTAACACGACGAAGCCTTTGCCAATTGAATAGGCCTCTGATGATGACAGAATCCGGTGAACACGGAGCGTTACACGGCGTGATTTCACGCAGGAGAACCAGTGAAACAACGGCAGACTTCAAAAAGGATGAAATGCCTGCTGCTGGCAGGGACATGGTTGATGGAAGTTTGGAACTGATGGTGCAACAACGACCGCCGGAGCATCATGCTCGTACATGTAATATGCGTACCCCAACAACGGCCGACGGTGCGGTGCCATCCGTGGGCCAGATTCGGCGGAAAGGAGCGCGTAGAGTTAATCGC…	MLMGATKMEFSFLQRSHANTAQDTLRLEEATALTRRSLCQLNRPLMMTESGEHGALHGVISRRRTSETTADFKKDEMPAAGRDMVDGSLELMVQQRPPEHHARTCNMRTPTTADGAVPSVGQIRRKGARRVNRELTVVRAGFRELLGLAQARSAKVAERMVTRSARACIAAQRRAMQVR	NA				NA				NA				NA
Ec-sdr_f_000220	Esil-f_000220	F	ATGCAGGCAACAAACGCCCCAACACAACTTGTCGAGCAGCGGGCGTGGTGCTGGCGAGAGCAGAACAAGCTATCGGAAGCATTCGCTACAGCATGGTGTTTTCTATCCGATACCATGCTACTTGAGCGGCCTGTAGTGTCGACTGTGGTGAGCGCTGCGGTATGCATCGCCCTTGCGTCGGGGCTGACGGATATTGATGTGACCTACAGCGTCACAAGCACGCTATGCTCACGAGGCACTGACCGCAGTCCCCACAGGCGGAATGCAGATGAGGTGGCGCAGCTTTTCCCGTCCAGCCCGCGTTTCAGTCAGATCTTGTTTACCACGCCCGAGCCCAACTCCTCCAGCCACGAAGAAGATACTAACGTGCTGAAAGAGGAAATTTTCGACGAAATTTGG…	MQATNAPTQLVEQRAWCWREQNKLSEAFATAWCFLSDTMLLERPVVSTVVSAAVCIALASGLTDIDVTYSVTSTLCSRGTDRSPHRRNADEVAQLFPSSPRFSQILFTTPEPNSSSHEEDTNVLKEEIFDEIWSIAEKVALIEAGLNNESYDSLCYRHSTNGRCASYGVLSFWDGDEALYRSGVADNQSLRIGLSSETFRDGTPVPRDLVFGDYSLVKDEARCALHEMVSWSLSCQHGILEATFRWASYVLAS	Efas-f_000220	F	ATGCAGGCAACAAACGCCCCAACACAGCTTGTCGAGCAGCGGGCGTCGTGCTGGCGAGAGCAGAACAAGCTATCAGAGGCATTCGCTACAGCATGGTGTTTTTTATCCGATACCATGCTACTCGAGCGTCCTGTGGTGTCGATTGTGGTGAGCACTGCGATATGCATCGCCCTTGCATCGGGGCTGGCGGATATTGATGTGACCTACAGTATCACAAGCACGCTAAGCTCACGAGGCACTGACCGCAGTCCCCACAGGCGGAATGCAGCTGACGTGGCGCAACTTTTCCCGCCCAGCCCACGTTTCAGCCAGATCTTGTTTACCACACCCGAGTCCAACTACTCCAGCCACGAGGAAGATACTAATGTACTGAAAAAGGAAATTTTCGACGACATTTGG…	MQATNAPTQLVEQRASCWREQNKLSEAFATAWCFLSDTMLLERPVVSIVVSTAICIALASGLADIDVTYSITSTLSSRGTDRSPHRRNAADVAQLFPPSPRFSQILFTTPESNYSSHEEDTNVLKKEIFDDIWGIAEKVALIEAGLKNESYDNLCYRHSKNGSCASHGVLSFWDGDEAFYRSAVADNQSLRIGLSSETFRDGTPVPRDLVFGDYSLVQDDARCALHEMVNWSSSCLHGLFEAVFRYASHVLVS	SL-f_000220	F	ATGCAGGCATCGCGAACTGCGACAGAGCTGAGCGAGTGGCCAACGTGGAGCCGGCGAAGTAAAAATGCCGTATCTGCGGCGTTCGCTACATCATGGTGCTATCTCTCCGAGTACTTGTTGCTTAAGCGAGATGCATTTGATGTGGAACAGCTTTTCCCCTCCAGCCCTCGTTTTAGCCAGCTTCTGTTCACTCCGCTTCATACCGGCGACGAGACCGATGGGGACCCGACAAACGTGCTGACGGAGGCAATCTTCGACGACATTTGGGGTGTAGCTGAGAAGGTGGCGTCAATTGAAGCCGGGCTGAAGAACGAGCTTCACGAAGCATTGTGCTACCGACACGCTGAGCATGGGAAATGCGCCCCTTACGGCGTGCTTTCCTTTTGGGACGGCGATGAG…	MQASRTATELSEWPTWSRRSKNAVSAAFATSWCYLSEYLLLKRDAFDVEQLFPSSPRFSQLLFTPLHTGDETDGDPTNVLTEAIFDDIWGVAEKVASIEAGLKNELHEALCYRHAEHGKCAPYGVLSFWDGDEALYRNVVADSQSLRIGLSAVTFNDGTPVPRDLVFGNFTIVRDEAR	NA				NA				NA
aSex linkage was determined by bioinformatic analysis (coverage) of male and female genomes and transcriptomes and, for all samples apart from those marked with an asterisk, also by PCR amplification from male and female genomic DNA samples.
bSex-linkage was verified by PCR elewhere (27)

## Sheet: Table S9 strains Sjap
Table S9. Strains of S. japonica used in the study to correlate phenotypic and genotypic sex.
Saccharina japonica
Strain name	Phenotypic sex	Collection site	Collection year	Collector
SJ_F1	female	Muroran, Hokkaido, Japan	Nov, 2014	T.Motomura
SJ_F2	female	Muroran, Hokkaido, Japan	Nov, 2014	T.Motomura
SJ_F3	female	Muroran, Hokkaido, Japan	Nov, 2014	T.Motomura
SJ_M1	male	Muroran, Hokkaido, Japan	Nov, 2014	T.Motomura
SJ_M2	male	Muroran, Hokkaido, Japan	Nov, 2014	T.Motomura
SJ_M3	male	Muroran, Hokkaido, Japan	Nov, 2014	T.Motomura
Sjap_F	female	Muroran, Hokkaido, Japan	Nov, 2011	T.Motomura
Sjap_M	male	Muroran, Hokkaido, Japan	Nov, 2011	T.Motomura
KU-508	male	Muroran, Hokkaido, Japan	-	H.Kawai
KU-511	female	Muroran, Hokkaido, Japan	-	H.Kawai

## Sheet: Table S10 primers
Table S10. Primers used to investigate sex-linkage in S. japonica.
Marker name	scaffold S. japonica	Primer_F	Primer_R	Sex specificity
Sj_M1	scaffold1033	GCCCTTCGGTTACTTTCTCC	CACACGTAGGCAAGATGGAA	Male
Sj_M2	scaffold1050	TGAATTTAGTGCCGGGTAGG	TTGGGAAAGTTGGAGTGTCC	Male
Sj_M3	scaffold1081	TGCTTGCAAAAGAACTCGAA	CTCCTGACAAGCCCAACATC	Male
Sj_M4	scaffold1107	TTCCCAACCCGTTGTTAGTC	GTCGTGTCGGCATAGAGGAT	Male
Sj_M5	scaffold1121	TCGCGCAACAGACAATCTAC	CTGCGAACTTTCCTCGATTC	Male
Sj_M6	scaffold1211	GTGACCCCGGATCTGAGTTA	ATCTCCCTGCCACAACAGTC	Male
Sj_M7	scaffold1243	CAACTTGGCGACTGTGGATA	AAAAGTTGTGTGCGTGCTTG	Male
Sj_M8	scaffold1377	TTCCTCACAACATCCACCAA	AGGAGGCAGAAATCAGCAAA	Male
Sj_M9	scaffold1396	CTACAGCGCTGCTCGTAGTG	GGCAACACCACAGGAAAGTT	Male
Sj_M10	scaffold1406	CACAACCCGACATGAAACTG	ATACCCTCCGACTCCGCTAT	Male
Sj_M11	scaffold1441	ATACGACACGAGGGAAGCAC	GAAACATGAAAGACGCAGCA	Male
Sj_M12	scaffold1514	AACGAGGAGTGATTGGCAAC	AGGTGTGCACCATTGTTTGA	Male
Sj_M13	scaffold1550	TCTAAGGCCTTTTTGCCTGA	TTTCAATACCTGGGGAACCA	Male
Sj_M14	scaffold1552	CACGGCGTGCTTATTCTGTA	CCTTGCGTTTCAGATCCATT	Male
Sj_M15	scaffold1609	TAATGAGGACGGCGTAATCC	GAGATGCGGTTATGGGAGAA	Male
Sj_M16	scaffold1616	AACAAGACGGCGAAGAAGAA	CGGAATCCCACCGTCTACTA	Male
Sj_M17	scaffold1689	CTCACCGCTACCATGGACTT	CGAAAAGTGGGAATCGAAAG	Male
Sj_M18	scaffold1744	AGATTGCAAATCCCAAAACG	CCCCGTCGTAGTTGTCTTGT	Male
Sj_M19	scaffold1781	AGGAAACGTCGGCGTGTAT	CTGAGTCTCTCGCCCTGAAG	Male
Sj_M20	scaffold1783	TTAGGCCAAACCGTAGTTGC	AATTCATCATCTCCCCACCA	Male
Sj_M21	scaffold1788	GGCACGGCGATATCTGTACT	GCCCCGTTGTACTTCACTGT	Male
Sj_M22	scaffold1790	CTTGCTTGCGCCACATTC	GTTGGTCCTCGGTGTGTTCT	Male
Sj_M23	scaffold1885	ATGGCGTCAGTCTCCTGTCT	CTTGAGCGCCACAACAATAA	Male
Sj_M24	scaffold1944	TCAAGCGTACACCTTCCAGA	ACAGCCAACCCAACCATAAA	Male
Sj_M25	scaffold2020	ACACATCTGGGCGATAAAGG	GGAACAGACACGAGACCACA	Male
Sj_M26	scaffold2057	ATGCGACTCCTGTCAATTCC	CTGGGTTGGGTTTTCATCAC	Male
Sj_M27	scaffold2133	TGCCATACCATTTGGCACTA	TTGTTCTTGGATCGGTTTCC	Male
Sj_M28	scaffold2164	AAGGCGTGCTACGATGCTAC	CGTTCACGAAAACCAAGTCA	Male
Sj_M29	scaffold2170	GTCAATCGACCGGACACTTT	TACCGGCAAATAGGCATCTC	Male
Sj_M30	scaffold2185	TCAATCGCATCCAATCGTAA	AGGAAGGTACAGCTGCCTCA	Male
Sj_M31	scaffold2287	CAATAATGGGTGCTGGCTTT	CCGCTTATATGCACTGCTCA	Male
Sj_M32	scaffold2288	ACTGGGGTGTTCCTCTCCTT	CCTAGAACTGGCGCTACCAC	Male
Sj_M33	scaffold2402	ATAAGCCGTGGATCGAACAG	AACTAGGCCACGATCCACAC	Male
Sj_M34	scaffold2418	GGTTCACTGGCAAAAGGGTA	TCAGTGGTCATACAGCCACA	Male
Sj_M35	scaffold2454	CTTTTTCGTCCGTTCTCTCG	AGTAGTATCCCAGCGCCAGA	Male
Sj_M36	scaffold2586	CTGAATCGCCCAAAAACAAT	ATCCCCTGCTGTTTGTATCG	Male
Sj_M37	scaffold2624	AGCGTCTTTGCAATTGTGTG	GTCGTTGAATCTGTCGCTGA	Male
Sj_M38	scaffold2635	GATAACCGACTCGACCCAGA	CACGACCCCATAGCCATAGT	Male
Sj_M39	scaffold2770	GCCTGCGTTTCTTCTTGTTC	AGCATCCGCCCACTATACAC	Male
Sj_M40	scaffold2797	ACCCATAGATCCCCTTGTCC	CCAACTCTCGCAGGTAGGTC	Male
Sj_M41	scaffold2859	CGCGTCAGTCCTAGTGAACA	CGCTGCTTCATGCTCAATTA	Male
Sj_M42	scaffold2898	GCACCCACTTGGCATCTTAT	CAGTTTTTGCGACAACCTGA	Male
Sj_M43	scaffold3026	GACCCTGTACGCCTGTGATT	CCGTAGGTAAGCACCTCTGC	Male
Sj_M44	scaffold3044	AGATCATCCCTACGGGAACC	TGCCTGGTCTGTAGTTGCTG	Male
Sj_M45	scaffold3251	AGGTGGGCATGATACAAAGC	GGGGGTAAGGAATCAGTGGT	Male
Sj_M46	scaffold3294	CCAATACGCCTTGTTTCGTT	CAAAGATTGGTTGCGCAGTA	Male
Sj_M47	scaffold3330	TAGCTGCACAACGTCGAAAC	CCCCCTGTCATAACCATACG	Male
Sj_M48	scaffold3373	AGCGAATGTCTGCCTCAACT	ACTGCTACGTGCTCCTCGAT	Male
Sj_M49	scaffold3430	TCGAAACGAAATGGGTAGGT	CCTTGACGCTAACAGGCTTC	Male
Sj_M50	scaffold3441	GCCATCGAAATACCGAACAT	TAGATTTTTCTCGGCGCATC	Male
Sj_M51	scaffold3705	AGCTTGCATCCTTGAGGAAA	CGTGGAGGACGCTGATTTAT	Male
Sj_M52	scaffold3746	CGAACTTGTATGCTGCTGCT	ATGTTGCCTGACGTTGATGA	Male
Sj_M53	scaffold3777	CTGAATCTCACCGCAGGAAT	CGTAGATGGTGTGGATGACG	Male
Sj_M54	scaffold378	AGCTCAGCAGCAGCAGTACA	GCTTTGTTCGCCCTCAGTAG	Male
Sj_M55	scaffold3885	CCAAGGGATGGCAAGAAATA	TGCGTACTGGCGTTTATCAG	Male
Sj_M56	scaffold4133	CGGGTTCTCGTGATTTGATT	TACCACGAGCAGTGAGCATC	Male
Sj_M57	scaffold477	AGCGAGGGAGGCTATTAAGC	AGGTTCCATCGGAAGTTGTG	Male
Sj_M58	scaffold788	AGCTCCGTTCATCTCCTACC	GCCTCCGTTTGTGAGTGTTT	Male
Sj_M59	scaffold907	TGAGATCAAGGGACTTGACG	CTTGCGTGCCAATTCAACTA	Male
Sj_M60	C60807	ACGTAGGCCACGAAGTGAAA	CCCTGAATCGAATGCTCAG	Female
Sj_M61	M_scaffold1883	CGTTTGACAAGGAGGGAAAA	CGTCACCTTCATGTCGATGT	Female
Sj_M62	M_scaffold1046	TGCCCCAAACACGTACAATA	CGAGGTATCTGCCTCGTAGC	Female
Sj_M63	M_scaffold2115	ATGGCAACAGCAGTGTTCAG	CGCGTGCAAACAATACCTTA	Female
Sj_M64	M_scaffold2153	TTGTTGAAAGCTCCCTTCGT	GTGTGTGGTCGTTCCTGTTG	Female
Sj_M65	M_scaffold2801	GGTGGAAAAACGTCAAAGGA	GAACGCAATGCTGAGACAAA	Female
Sj_M66	M_scaffold3172	CCGTAAAAGAGCTGCTGGAG	AGTTCGTGTGGGAAATACGC	Female
Sj_M67	M_scaffold3297	AGAGGTTAGCGTGGAGGTGA	ACACGCAGCGATAGTCACAC	Female
Sj_M68	M_scaffold344	CAAACAGGGGCAAGTTCATT	CGCCAACACTTGTCGTATTG	Female
Sj_M69	M_scaffold3617	CCGTAAAAGAGCTGCTGGAG	AGTTCGTGTGGGAAATACGC	Female
Sj_M70	M_scaffold377	GCTGATGCTGGCAGTTACAA	GCCATTCAGGCTCAAGCTAC	Female
Sj_M71	M_scaffold4021	GGCTGTTTCAAGCATGGATT	GCGTCGTCGTTACCTGATTT	Female
Sj_M72	M_scaffold4178	TGCTTCTTCAACAGGCAAGA	CCTCCTCGTGTACCAACTCC	Female
Sj_M73	M_scaffold4362	CTGTACGAGCATGTCCCTCA	AGCCCTGAGATGTGTGGAGA	Female
Sj_M74	M_scaffold644	CGCAAGCCTATTAGCGTACA	GGATATATTTGCGGCGTTTC	Female
Sj_M75	M_scaffold694_1	CCATGCACTGTTACCCTCCT	CCGCTGTTTTCTCCGTACAT	Female

[truncated: 1 more sheets: Table S11 sex linkage Sjap]
